# Supplementary material
Source: publisher figshare collection journal article supplement (https://acs.figshare.com/ndownloader/files/3601380)
Supplement: Supplementary file 1 [file 3601380]

## Sheet: 350
Supplementary Table S1
PS regulated for each VPA concentration compared to untreated control on DoD6. Fold change is given in linear range. p-value was achieved by paired t-test and false discovery rate (FDR) correction was done by the method of Benjamini Yekuteli. p-values are given in log scale. Tab. S1 corresponds to Fig. 2.
350 µM VPA
ID	symbol	fold change	-log(p-value)	-log(p-value) BY-adjusted
207443_at	NR2E1	0.23	6.01	1.96
206588_at	DAZL	0.23	5.59	1.79
206140_at	LHX2	0.23	4.96	1.48
242054_s_at	SIX3	0.24	4.78	1.39
237472_at	SOX1	0.29	6.07	1.97
213912_at	TBC1D30	0.3	5.87	1.91
238625_at	C1orf168	0.31	5.49	1.74
229085_at	LRRC3B	0.32	5.63	1.79
221086_s_at	FEZF2	0.32	4.72	1.36
206634_at	SIX3	0.34	5.62	1.79
213913_s_at	TBC1D30	0.34	5.6	1.79
221245_s_at	FZD5	0.34	5.63	1.79
238755_at	RASSF10	0.34	5.07	1.52
206343_s_at	NRG1	0.35	5.28	1.63
205041_s_at	205041_s_at	0.35	4.77	1.39
1555800_at	ZNF385B	0.36	4.84	1.42
231898_x_at	SOX2-OT	0.36	4.76	1.38
1555801_s_at	ZNF385B	0.36	4.62	1.3
1552575_a_at	C6orf141	0.39	4.63	1.31
223468_s_at	RGMA	0.4	5.36	1.68
202219_at	SLC6A8	0.4	4.9	1.46
1559067_a_at	LOC158402	0.41	5.42	1.71
1558388_a_at	UG0898H09	0.42	4.83	1.42
230785_at	230785_at	0.42	4.61	1.3
212143_s_at	IGFBP3	0.43	4.96	1.48
228658_at	MIAT	0.44	5.18	1.6
226279_at	PRSS23	0.44	4.92	1.47
237322_at	MIAT	0.45	4.69	1.34
222217_s_at	SLC27A3	0.45	4.67	1.33
231800_s_at	DMRT3	0.45	4.65	1.32
227168_at	MIAT	0.46	4.93	1.47
206136_at	FZD5	0.46	4.91	1.46
219820_at	SLC6A16	0.46	4.79	1.4
204121_at	GADD45G	0.48	4.66	1.32
201427_s_at	SEPP1	2.01	4.62	1.3
1554863_s_at	DOK5	2.02	4.71	1.35
204347_at	204347_at	2.02	4.62	1.3
227817_at	PRKCB	2.04	4.68	1.34
244565_at	HMX2	2.05	4.66	1.32
213397_x_at	213397_x_at	2.06	4.68	1.34
218189_s_at	NANS	2.06	4.65	1.32
221217_s_at	RBFOX1	2.07	4.73	1.36
202720_at	TES	2.09	4.73	1.36
210519_s_at	NQO1	2.1	4.85	1.43
212724_at	RND3	2.11	4.72	1.36
226938_at	DCAF4	2.11	4.72	1.36
203814_s_at	NQO2	2.12	4.87	1.44
224218_s_at	TRPS1	2.12	4.68	1.34
226452_at	PDK1	2.12	4.65	1.32
201849_at	BNIP3	2.13	4.84	1.43
213479_at	NPTX2	2.13	4.73	1.36
205030_at	FABP7	2.15	4.9	1.46
210601_at	CDH6	2.15	4.69	1.34
241698_at	RFTN2	2.16	4.98	1.49
227830_at	GABRB3	2.16	4.94	1.47
1552578_a_at	MYO3B	2.16	4.8	1.4
242909_at	242909_at	2.17	4.97	1.48
207327_at	EYA4	2.17	4.82	1.42
228750_at	228750_at	2.18	4.8	1.4
203066_at	CHST15	2.21	5.06	1.52
201163_s_at	IGFBP7	2.21	4.96	1.48
217764_s_at	RAB31	2.21	4.61	1.3
206481_s_at	LDB2	2.23	4.93	1.47
222651_s_at	TRPS1	2.23	4.89	1.45
219869_s_at	SLC39A8	2.23	4.75	1.37
206373_at	ZIC1	2.24	5.04	1.51
214844_s_at	DOK5	2.25	5.05	1.51
226560_at	226560_at	2.26	4.94	1.47
230623_x_at	USP28	2.26	4.81	1.41
205029_s_at	FABP7	2.27	4.99	1.49
221605_s_at	PIPOX	2.28	4.93	1.47
205433_at	BCHE	2.28	4.89	1.45
219955_at	L1TD1	2.28	4.88	1.45
235956_at	KIAA1377	2.29	5.15	1.58
207957_s_at	PRKCB	2.29	4.85	1.43
236180_at	236180_at	2.3	4.81	1.41
200660_at	S100A11	2.3	4.62	1.3
228598_at	DPP10	2.31	4.68	1.34
1556629_a_at	SNAP25	2.32	5.04	1.51
209267_s_at	SLC39A8	2.35	5.21	1.61
219764_at	FZD10	2.35	4.8	1.4
202620_s_at	PLOD2	2.36	4.77	1.39
230220_at	UNC80	2.36	4.69	1.34
203397_s_at	GALNT3	2.36	4.64	1.31
1569796_s_at	ATRNL1	2.37	5.19	1.6
207680_x_at	PAX3	2.37	5.02	1.51
226497_s_at	FLT1	2.37	4.99	1.49
226863_at	FAM110C	2.37	4.94	1.47
218502_s_at	TRPS1	2.37	4.62	1.3
208358_s_at	UGT8	2.38	5.17	1.59
1552712_a_at	NMNAT2	2.38	5.15	1.58
201467_s_at	NQO1	2.38	4.98	1.49
235174_s_at	LOC100128822	2.4	5.28	1.63
201468_s_at	NQO1	2.4	5.03	1.51
223423_at	GPR160	2.41	5.19	1.6
212099_at	RHOB	2.42	5.27	1.63
210033_s_at	SPAG6	2.42	4.82	1.41
236894_at	L1TD1	2.43	4.99	1.49
225681_at	CTHRC1	2.44	5.35	1.67
230303_at	SYNPR	2.44	4.94	1.47
211668_s_at	PLAU	2.44	4.92	1.46
226225_at	MCC	2.44	4.64	1.31
233536_at	ASXL3	2.45	5.1	1.54
204518_s_at	PPIC	2.45	5	1.49
225342_at	225342_at	2.46	4.78	1.39
225173_at	ARHGAP18	2.47	4.78	1.39
227210_at	SFMBT2	2.48	5.26	1.63
204595_s_at	STC1	2.48	5.01	1.5
1553654_at	SYT14	2.49	5.32	1.66
206653_at	POLR3G	2.49	5.03	1.51
227862_at	TRNP1	2.5	4.75	1.37
202403_s_at	COL1A2	2.5	4.7	1.35
205278_at	GAD1	2.51	5.37	1.68
227099_s_at	C11orf96	2.51	5.04	1.51
204933_s_at	TNFRSF11B	2.51	4.87	1.44
212538_at	DOCK9	2.53	5.49	1.74
210665_at	TFPI	2.53	4.84	1.43
221916_at	NEFL	2.54	5.4	1.7
207424_at	MYF5	2.55	5.52	1.74
232226_at	LRRC4C	2.56	5.49	1.74
239572_at	GJA3	2.56	4.63	1.31
221801_x_at	NEFL	2.57	5.15	1.58
232176_at	SLITRK6	2.59	5.53	1.75
222747_s_at	SCML1	2.59	5.29	1.63
214811_at	RIMBP2	2.59	5.07	1.52
227297_at	ITGA9	2.59	4.98	1.49
214265_at	ITGA8	2.59	4.96	1.48
202619_s_at	PLOD2	2.6	5.52	1.75
219355_at	CXorf57	2.6	5.45	1.72
202936_s_at	SOX9	2.6	5.35	1.67
219195_at	PPARGC1A	2.63	5.45	1.72
226448_at	226448_at	2.63	5.17	1.59
235518_at	SLC8A1	2.63	4.8	1.4
232151_at	MACC1	2.63	4.64	1.31
219474_at	C3orf52	2.63	4.62	1.3
210664_s_at	TFPI	2.65	4.75	1.37
206701_x_at	EDNRB	2.66	5.41	1.7
228782_at	SCGB3A2	2.68	5.07	1.52
206670_s_at	GAD1	2.71	5.64	1.79
209469_at	GPM6A	2.71	5.61	1.79
232720_at	LINGO2	2.71	5.12	1.56
209921_at	SLC7A11	2.71	4.9	1.46
214596_at	CHRM3	2.71	4.9	1.46
209480_at	HLA-DQB1	2.72	5.23	1.62
222071_s_at	SLCO4C1	2.74	5.26	1.63
221729_at	COL5A2	2.74	5.19	1.6
221805_at	NEFL	2.74	4.91	1.46
228850_s_at	SLIT2	2.76	5.24	1.62
230237_at	ADCYAP1	2.76	4.98	1.49
228293_at	DEPDC7	2.77	5.7	1.81
238877_at	EYA4	2.77	5.29	1.63
204597_x_at	STC1	2.77	4.92	1.46
227703_s_at	SYTL4	2.78	5.62	1.79
235976_at	SLITRK6	2.8	5.24	1.62
244170_at	RAB3C	2.8	4.7	1.35
237034_at	237034_at	2.8	4.63	1.31
227627_at	227627_at	2.82	5	1.49
210032_s_at	SPAG6	2.82	4.82	1.42
233934_at	LOC349160	2.83	5.36	1.68
225171_at	ARHGAP18	2.84	5.6	1.79
218764_at	PRKCH	2.84	4.95	1.48
205942_s_at	ACSM3	2.84	4.88	1.45
209966_x_at	ESRRG	2.85	5.03	1.51
227209_at	CNTN1	2.85	4.73	1.36
211148_s_at	ANGPT2	2.86	5.37	1.68
218656_s_at	LHFP	2.86	4.78	1.39
211776_s_at	EPB41L3	2.87	4.61	1.3
218793_s_at	SCML1	2.88	5.87	1.91
222108_at	AMIGO2	2.88	5.33	1.66
228796_at	CPNE4	2.89	4.94	1.47
213601_at	213601_at	2.91	5.58	1.78
203001_s_at	STMN2	2.93	5.88	1.91
211470_s_at	SULT1C2	2.93	5.74	1.83
218995_s_at	EDN1	2.93	4.67	1.33
213258_at	TFPI	2.96	4.98	1.49
232481_s_at	SLITRK6	2.97	5.06	1.52
206326_at	GRP	2.97	4.79	1.4
213373_s_at	CASP8	2.98	5.1	1.54
204273_at	EDNRB	2.99	5.66	1.79
205626_s_at	CALB1	2.99	4.85	1.43
202935_s_at	SOX9	3.01	5.21	1.61
231798_at	NOG	3.02	5.62	1.79
230262_at	ST8SIA3	3.02	5.01	1.49
209755_at	NMNAT2	3.04	5.68	1.8
209406_at	BAG2	3.04	5.24	1.62
217678_at	SLC7A11	3.06	5.44	1.72
205342_s_at	SULT1C2	3.06	5.41	1.7
203786_s_at	TPD52L1	3.07	5.65	1.79
222891_s_at	BCL11A	3.09	5.28	1.63
206710_s_at	EPB41L3	3.09	5.11	1.55
212188_at	KCTD12	3.12	4.73	1.36
238447_at	RBMS3	3.14	5.83	1.9
205113_at	NEFM	3.15	4.84	1.43
204115_at	GNG11	3.17	5.49	1.74
204271_s_at	EDNRB	3.17	5.44	1.72
239911_at	ONECUT2	3.18	5.37	1.68
228335_at	CLDN11	3.19	6.05	1.97
203000_at	STMN2	3.19	6	1.95
243555_at	243555_at	3.24	5.96	1.93
229963_at	BEX5	3.24	5.84	1.9
201005_at	CD9	3.24	5.34	1.67
231380_at	C8orf34	3.25	5.1	1.54
223734_at	MGARP	3.26	6.1	1.99
237911_at	237911_at	3.26	4.99	1.49
212681_at	EPB41L3	3.27	5.59	1.79
229218_at	COL1A2	3.27	4.8	1.4
201590_x_at	ANXA2	3.28	6.23	2.07
209803_s_at	PHLDA2	3.31	5.69	1.8
209676_at	TFPI	3.33	5.08	1.53
210427_x_at	ANXA2	3.34	6.24	2.07
1556638_at	PAX7	3.34	6.18	2.04
239975_at	HLA-DPB2	3.35	5.24	1.62
206552_s_at	TAC1	3.36	5.83	1.9
226534_at	KITLG	3.36	5.32	1.66
221730_at	COL5A2	3.36	5.07	1.52
210319_x_at	MSX2	3.37	4.69	1.34
213503_x_at	ANXA2	3.38	6.24	2.07
230372_at	HAS2	3.38	5.64	1.79
202454_s_at	ERBB3	3.39	5.27	1.63
204591_at	CHL1	3.39	5.24	1.62
205738_s_at	FABP3	3.41	5.89	1.91
210292_s_at	210292_s_at	3.41	5.48	1.74
242871_at	PAQR5	3.41	5.29	1.63
205524_s_at	HAPLN1	3.42	4.73	1.36
228956_at	UGT8	3.43	5.57	1.78
205932_s_at	MSX1	3.44	5.64	1.79
226751_at	CNRIP1	3.44	5.14	1.58
205609_at	ANGPT1	3.46	5.04	1.51
236359_at	SCN4B	3.48	5.77	1.86
204471_at	GAP43	3.5	6.27	2.07
209470_s_at	GPM6A	3.5	5.96	1.93
210372_s_at	TPD52L1	3.5	5.57	1.78
206310_at	SPINK2	3.53	5.48	1.74
203799_at	203799_at	3.58	5.91	1.91
228716_at	THRB	3.58	5.22	1.62
204823_at	NAV3	3.59	5.91	1.91
206001_at	NPY	3.6	6.31	2.07
206286_s_at	206286_s_at	3.63	6.1	1.99
209160_at	AKR1C3	3.69	5.22	1.62
202435_s_at	CYP1B1	3.71	5.5	1.74
1562301_at	C8orf34	3.72	5.17	1.59
209199_s_at	MEF2C	3.73	6.43	2.07
209200_at	MEF2C	3.73	5.84	1.9
219814_at	MBNL3	3.75	6.05	1.97
202202_s_at	LAMA4	3.75	5.25	1.63
206332_s_at	IFI16	3.76	6.15	2.02
232116_at	GRHL3	3.8	5.57	1.78
236045_x_at	236045_x_at	3.85	5.94	1.92
231666_at	PAX3	3.86	4.88	1.45
228635_at	PCDH10	3.88	5.64	1.79
1552658_a_at	NAV3	3.89	6.37	2.07
1554547_at	FAM13C	3.89	6.27	2.07
229125_at	KANK4	3.89	5.9	1.91
206280_at	CDH18	3.9	6.33	2.07
203649_s_at	PLA2G2A	3.9	4.97	1.49
202436_s_at	CYP1B1	3.94	5.5	1.74
1554524_a_at	OLFM3	3.95	6.15	2.02
212614_at	ARID5B	3.99	6.68	2.18
222802_at	EDN1	4.05	5.6	1.79
206432_at	HAS2	4.11	6.18	2.04
203789_s_at	SEMA3C	4.17	6.04	1.97
1554526_at	OLFM3	4.17	5.39	1.7
208966_x_at	IFI16	4.22	6.65	2.18
212192_at	KCTD12	4.33	5.88	1.91
205286_at	TFAP2C	4.36	6.58	2.14
202508_s_at	SNAP25	4.4	5.81	1.89
218468_s_at	GREM1	4.43	6.27	2.07
201324_at	EMP1	4.55	6.25	2.07
229004_at	ADAMTS15	4.57	6.47	2.07
242344_at	GABRB2	4.61	5.99	1.95
230423_at	230423_at	4.62	6.02	1.96
219179_at	DACT1	4.63	6.26	2.07
223962_at	TTC29	4.67	6.44	2.07
213107_at	TNIK	4.73	6.97	2.25
226281_at	DNER	4.8	6.9	2.22
209840_s_at	LRRN3	4.85	5.78	1.86
208965_s_at	IFI16	4.93	6.84	2.22
209687_at	CXCL12	4.94	5.44	1.72
218469_at	GREM1	4.99	6.27	2.07
1556421_at	LOC286189	5.01	6.79	2.22
229498_at	MBNL3	5.01	6.64	2.18
202437_s_at	CYP1B1	5.02	6.37	2.07
209723_at	SERPINB9	5.13	6.8	2.22
210145_at	PLA2G4A	5.13	6.39	2.07
213109_at	TNIK	5.17	6.27	2.07
205572_at	ANGPT2	5.32	5.41	1.7
204463_s_at	EDNRA	5.35	5.7	1.81
209841_s_at	LRRN3	5.37	6.35	2.07
205431_s_at	BMP5	5.39	7.02	2.26
218589_at	LPAR6	5.49	6.81	2.22
230204_at	HAPLN1	5.51	5.9	1.91
220184_at	NANOG	5.91	6.63	2.18
207729_at	CDH9	6.26	4.87	1.44
243610_at	C9orf135	6.72	5.23	1.62
205523_at	HAPLN1	6.79	6.26	2.07
1559280_a_at	LOC100506013	7.21	5.47	1.73
211828_s_at	TNIK	7.29	7.3	2.37
228875_at	FAM162B	7.29	6.72	2.18
238914_at	DCC	7.39	7.16	2.36
241986_at	BMPER	7.59	5.86	1.9
224833_at	ETS1	8.63	7.39	2.37
237375_at	237375_at	8.87	7.51	2.41
1553394_a_at	TFAP2B	9.06	7.17	2.36
205430_at	BMP5	9.33	7.72	2.52
204653_at	TFAP2A	12	7.27	2.37
214451_at	TFAP2B	12.83	8.35	2.89
213139_at	SNAI2	13.77	8.46	2.89
241612_at	FOXD3	17.15	8.21	2.89

## Sheet: 450
450 µM VPA
ID	symbol	fold change	-log(p-value)	-log(p-value) BY-adjusted
221086_s_at	FEZF2	0.14	5.75	2.12
233972_s_at	FEZF2	0.14	4.62	1.52
237472_at	SOX1	0.17	6.83	2.62
242054_s_at	SIX3	0.17	6.43	2.43
229085_at	LRRC3B	0.17	5.93	2.2
206588_at	DAZL	0.19	6.44	2.43
238755_at	RASSF10	0.19	6.11	2.28
207443_at	NR2E1	0.2	5.36	1.92
213913_s_at	TBC1D30	0.21	6.45	2.43
239230_at	HES5	0.21	4.36	1.37
231898_x_at	SOX2-OT	0.22	6.08	2.27
238625_at	C1orf168	0.24	6.44	2.43
243672_at	SALL3	0.24	6.2	2.32
230785_at	230785_at	0.24	5.81	2.13
213912_at	TBC1D30	0.24	5.62	2.06
228658_at	MIAT	0.25	6.37	2.42
238661_at	LOC100130155	0.25	4.83	1.63
1555801_s_at	ZNF385B	0.25	4.63	1.53
1555800_at	ZNF385B	0.26	5.09	1.78
220519_s_at	LIM2	0.26	4.98	1.72
211427_s_at	KCNJ13	0.26	4.89	1.67
230045_at	CNTN2	0.27	5.76	2.12
232847_at	SALL3	0.27	5.72	2.1
242193_at	LOC100130155	0.27	4.93	1.69
1554314_at	C6orf141	0.27	4.45	1.42
210179_at	KCNJ13	0.28	5.63	2.06
206634_at	SIX3	0.28	4.92	1.68
237322_at	MIAT	0.29	5.89	2.18
206343_s_at	NRG1	0.29	5.48	1.98
210095_s_at	IGFBP3	0.29	5.38	1.93
221245_s_at	FZD5	0.3	5.42	1.96
230147_at	F2RL2	0.31	5.31	1.9
239556_at	LOC645513	0.31	4.27	1.31
227168_at	MIAT	0.32	5.5	1.99
219197_s_at	SCUBE2	0.32	5.23	1.85
226279_at	PRSS23	0.32	5.05	1.76
1552575_a_at	C6orf141	0.33	5.63	2.06
1561969_at	ZPLD1	0.33	5.06	1.77
202219_at	SLC6A8	0.33	4.93	1.69
210493_s_at	MFAP3L	0.34	5.42	1.96
224774_s_at	NAV1	0.34	5.38	1.93
229441_at	PRSS23	0.34	4.87	1.66
230889_at	LOC645321	0.34	4.67	1.54
207103_at	KCND2	0.34	4.41	1.39
203868_s_at	VCAM1	0.35	5.65	2.07
213843_x_at	SLC6A8	0.36	5.45	1.97
243996_at	243996_at	0.36	4.85	1.65
1553202_at	STOX1	0.36	4.63	1.52
202458_at	PRSS23	0.37	5.42	1.96
223468_s_at	RGMA	0.37	5.06	1.77
240713_s_at	240713_s_at	0.37	4.6	1.51
229019_at	ZNF385B	0.37	4.54	1.47
1552520_at	TMEM74	0.38	5.32	1.9
244116_at	244116_at	0.38	4.8	1.62
206157_at	PTX3	0.39	5.21	1.85
1554012_at	RSPO2	0.39	4.95	1.7
221029_s_at	WNT5B	0.4	5.07	1.77
227195_at	ZNF503	0.4	4.75	1.59
243806_at	243806_at	0.4	4.35	1.36
1552296_at	BEST4	0.41	5.21	1.85
230493_at	SHISA2	0.41	4.88	1.66
202708_s_at	HIST2H2BE	0.41	4.64	1.53
205041_s_at	205041_s_at	0.42	4.9	1.67
230928_at	230928_at	0.42	4.6	1.51
227697_at	SOCS3	0.42	4.34	1.36
224772_at	NAV1	0.43	4.89	1.67
229435_at	GLIS3	0.43	4.88	1.66
224773_at	NAV1	0.43	4.52	1.46
217028_at	CXCR4	0.43	4.48	1.44
219557_s_at	NRIP3	0.44	4.81	1.63
227020_at	YPEL2	0.44	4.83	1.63
219820_at	SLC6A16	0.44	4.57	1.49
1557667_at	1557667_at	0.44	4.43	1.41
204121_at	GADD45G	0.45	4.85	1.65
235456_at	235456_at	0.45	4.83	1.63
209560_s_at	DLK1	0.45	4.8	1.62
209806_at	HIST1H2BK	0.45	4.78	1.61
229351_at	229351_at	0.45	4.77	1.6
229092_at	NR2F2	0.45	4.68	1.55
206209_s_at	CA4	0.45	4.45	1.42
219696_at	DENND1B	0.45	4.4	1.39
211919_s_at	CXCR4	0.46	4.73	1.58
235829_at	CAHM	0.46	4.66	1.54
232989_s_at	CCDC136	0.46	4.64	1.53
228885_at	MAMDC2	0.46	4.61	1.51
212062_at	ATP9A	0.46	4.59	1.5
214774_x_at	TOX3	0.46	4.46	1.42
227584_at	NAV1	0.46	4.42	1.4
202037_s_at	SFRP1	0.47	4.71	1.57
230721_at	230721_at	0.47	4.68	1.55
224215_s_at	DLL1	0.47	4.67	1.54
204914_s_at	SOX11	0.47	4.63	1.52
1555982_at	ZFYVE16	0.47	4.6	1.51
215071_s_at	HIST1H2AC	0.47	4.53	1.46
223121_s_at	SFRP2	0.48	4.58	1.5
205442_at	MFAP3L	0.48	4.52	1.46
213283_s_at	SALL2	0.48	4.52	1.46
238129_s_at	FZD2	0.48	4.42	1.41
238787_at	DENND1B	0.48	4.39	1.39
1560652_at	1560652_at	0.48	4.38	1.38
242396_at	NR2F2-AS1	0.48	4.37	1.37
244133_at	USP49	0.48	4.37	1.37
210220_at	FZD2	0.48	4.29	1.33
204915_s_at	SOX11	0.49	4.55	1.48
209911_x_at	HIST1H2BD	0.49	4.56	1.48
235072_s_at	KIF13A	0.49	4.52	1.46
212427_at	KIAA0368	0.49	4.34	1.36
236501_at	236501_at	0.49	4.29	1.32
222784_at	SMOC1	0.5	4.48	1.44
229086_at	C1orf213	0.5	4.47	1.43
225511_at	GPRC5B	0.5	4.42	1.41
228081_at	CCNG2	0.5	4.43	1.41
205109_s_at	ARHGEF4	0.5	4.38	1.38
208215_x_at	DRD4	0.5	4.3	1.33
202769_at	CCNG2	0.51	4.39	1.38
201146_at	NFE2L2	1.91	4.27	1.3
209291_at	ID4	1.92	4.3	1.33
204326_x_at	MT1X	1.94	4.3	1.33
1553321_a_at	SULT1C4	1.94	4.29	1.32
226876_at	FAM101B	1.94	4.29	1.32
203455_s_at	SAT1	1.95	4.36	1.37
225202_at	RHOBTB3	1.95	4.37	1.37
222043_at	CLU	1.95	4.28	1.31
224909_s_at	PREX1	1.96	4.36	1.37
204389_at	MAOA	1.96	4.34	1.36
225573_at	225573_at	1.98	4.41	1.4
213546_at	DKFZP586I1420	1.98	4.4	1.39
203192_at	ABCB6	1.98	4.39	1.38
223748_at	SLC4A11	1.98	4.39	1.38
237552_at	LOC100505817	1.98	4.39	1.38
202733_at	P4HA2	1.98	4.35	1.36
202422_s_at	ACSL4	1.98	4.29	1.33
205618_at	PRRG1	1.98	4.31	1.33
230973_at	SH2D5	1.99	4.4	1.39
231336_at	CPNE4	1.99	4.4	1.39
220942_x_at	FAM162A	2	4.26	1.3
37549_g_at	BBS9	2.01	4.47	1.43
225081_s_at	CDCA7L	2.01	4.42	1.4
206907_at	TNFSF9	2.01	4.33	1.35
217356_s_at	PGK1	2.01	4.33	1.35
230920_at	TRABD2B	2.01	4.33	1.35
205891_at	ADORA2B	2.02	4.51	1.46
204879_at	PDPN	2.02	4.51	1.45
209457_at	DUSP5	2.02	4.51	1.45
233675_s_at	TPTE2P6	2.02	4.44	1.41
210592_s_at	SAT1	2.03	4.34	1.36
219703_at	MNS1	2.03	4.33	1.35
219867_at	CHODL	2.03	4.28	1.32
204466_s_at	SNCA	2.03	4.27	1.31
202345_s_at	FABP5	2.05	4.5	1.45
205381_at	LRRC17	2.05	4.51	1.45
221447_s_at	GLT8D2	2.05	4.44	1.41
213666_at	2006-09-01	2.05	4.31	1.33
201163_s_at	IGFBP7	2.06	4.53	1.46
242522_at	TCF24	2.06	4.5	1.45
224847_at	CDK6	2.06	4.45	1.42
201340_s_at	ENC1	2.06	4.38	1.38
203817_at	GUCY1B3	2.06	4.37	1.37
204679_at	KCNK1	2.06	4.37	1.37
230861_at	DKFZP434L187	2.07	4.57	1.49
209465_x_at	PTN	2.07	4.46	1.43
210033_s_at	SPAG6	2.07	4.43	1.41
224345_x_at	FAM162A	2.07	4.42	1.41
211737_x_at	PTN	2.07	4.37	1.37
202990_at	PYGL	2.08	4.52	1.46
213880_at	LGR5	2.09	4.59	1.5
235117_at	CHAC2	2.09	4.54	1.47
209466_x_at	PTN	2.09	4.53	1.46
232760_at	TEX15	2.09	4.27	1.31
215380_s_at	GGCT	2.09	4.26	1.3
215594_at	ERV9-1	2.1	4.6	1.51
233934_at	LOC349160	2.1	4.43	1.41
205533_s_at	CDH6	2.11	4.65	1.53
206481_s_at	LDB2	2.11	4.64	1.53
221539_at	EIF4EBP1	2.11	4.43	1.41
218332_at	BEX1	2.11	4.39	1.39
226354_at	LACTB	2.11	4.38	1.38
236377_at	TMEM132D	2.11	4.37	1.37
226697_at	FAM114A1	2.12	4.71	1.56
203304_at	BAMBI	2.12	4.69	1.55
229613_at	229613_at	2.12	4.68	1.55
210602_s_at	CDH6	2.12	4.56	1.49
222162_s_at	ADAMTS1	2.12	4.54	1.47
205668_at	LY75	2.12	4.35	1.36
219863_at	HERC5	2.13	4.67	1.54
223092_at	ANKH	2.13	4.66	1.54
227038_at	SGMS2	2.13	4.63	1.52
214608_s_at	EYA1	2.14	4.6	1.51
238584_at	IQCA1	2.14	4.5	1.45
208275_x_at	UTF1	2.14	4.46	1.42
201151_s_at	MBNL1	2.14	4.38	1.38
235956_at	KIAA1377	2.15	4.72	1.57
225716_at	BRI3BP	2.15	4.7	1.56
238063_at	TMEM154	2.15	4.55	1.48
226907_at	PPP1R14C	2.15	4.4	1.39
218699_at	RAB7L1	2.15	4.35	1.36
205433_at	BCHE	2.16	4.62	1.52
211555_s_at	GUCY1B3	2.16	4.5	1.45
201865_x_at	NR3C1	2.17	4.64	1.53
203180_at	ALDH1A3	2.17	4.52	1.46
201170_s_at	BHLHE40	2.18	4.62	1.52
224851_at	CDK6	2.18	4.58	1.5
201195_s_at	SLC7A5	2.18	4.53	1.46
219789_at	NPR3	2.18	4.43	1.41
219569_s_at	SLC35G2	2.19	4.77	1.6
201422_at	IFI30	2.2	4.64	1.53
224822_at	DLC1	2.2	4.58	1.5
202546_at	VAMP8	2.2	4.45	1.42
227070_at	GLT8D2	2.2	4.28	1.31
219740_at	VASH2	2.21	4.82	1.63
239533_at	GPR155	2.21	4.79	1.61
217294_s_at	ENO1	2.21	4.75	1.59
225540_at	MAP2	2.21	4.65	1.53
1555526_a_at	2006-09-01	2.21	4.63	1.52
223710_at	CCL26	2.22	4.71	1.56
203725_at	GADD45A	2.22	4.44	1.41
231195_at	KLRG2	2.23	4.28	1.31
208086_s_at	DMD	2.24	4.83	1.63
209842_at	SOX10	2.24	4.78	1.61
229376_at	PROX1	2.24	4.6	1.51
217109_at	MUC4	2.24	4.32	1.34
213456_at	SOSTDC1	2.24	4.3	1.33
230003_at	230003_at	2.25	4.7	1.56
236115_at	HTR7P1	2.25	4.64	1.53
204347_at	204347_at	2.25	4.31	1.33
203423_at	RBP1	2.26	4.6	1.51
229139_at	JPH1	2.26	4.52	1.46
1553151_at	ATP6V0D2	2.26	4.34	1.36
239345_at	SLC19A3	2.26	4.26	1.3
221898_at	PDPN	2.27	4.81	1.62
1556194_a_at	1556194_a_at	2.27	4.77	1.6
208500_x_at	FOXD3	2.28	4.36	1.37
219885_at	SLFN12	2.29	4.89	1.67
201848_s_at	BNIP3	2.29	4.51	1.45
204388_s_at	MAOA	2.3	4.97	1.71
226905_at	FAM101B	2.3	4.93	1.69
203814_s_at	NQO2	2.3	4.69	1.55
231517_at	ZYG11A	2.31	4.66	1.54
223557_s_at	TMEFF2	2.31	4.59	1.5
210754_s_at	LYN	2.32	4.87	1.66
227690_at	GABRB3	2.32	4.69	1.55
242338_at	TMEM64	2.32	4.64	1.53
205111_s_at	PLCE1	2.32	4.6	1.51
227084_at	DTNA	2.32	4.49	1.44
201601_x_at	201601_x_at	2.33	4.73	1.58
205625_s_at	CALB1	2.33	4.65	1.53
218723_s_at	RGCC	2.33	4.57	1.49
216236_s_at	216236_s_at	2.33	4.37	1.38
201427_s_at	SEPP1	2.34	4.73	1.58
202626_s_at	LYN	2.34	4.67	1.54
205184_at	GNG4	2.34	4.52	1.46
216967_at	GAP43	2.35	5.06	1.77
201116_s_at	CPE	2.35	5.05	1.76
208949_s_at	LGALS3	2.35	4.56	1.48
219895_at	TMEM255A	2.35	4.32	1.34
206542_s_at	SMARCA2	2.36	5.04	1.76
201438_at	COL6A3	2.36	4.95	1.7
201849_at	BNIP3	2.36	4.93	1.69
230769_at	DENND2C	2.36	4.51	1.45
206456_at	GABRA5	2.37	4.66	1.54
228441_s_at	228441_s_at	2.37	4.64	1.53
206669_at	GAD1	2.37	4.44	1.41
237275_at	LINC00458	2.38	4.88	1.66
226560_at	226560_at	2.38	4.83	1.63
236300_at	PDE3A	2.38	4.81	1.63
202672_s_at	ATF3	2.38	4.81	1.62
208146_s_at	CPVL	2.38	4.46	1.42
230836_at	ST8SIA4	2.39	4.85	1.65
205141_at	ANG	2.39	4.78	1.61
219498_s_at	BCL11A	2.39	4.76	1.59
207424_at	MYF5	2.39	4.69	1.55
211864_s_at	MYOF	2.39	4.42	1.4
201596_x_at	KRT18	2.4	4.88	1.66
232176_at	SLITRK6	2.4	4.84	1.64
225972_at	TMEM64	2.41	4.9	1.67
201467_s_at	NQO1	2.41	4.84	1.64
218162_at	OLFML3	2.41	4.38	1.38
206247_at	MICB	2.42	5.11	1.79
218189_s_at	NANS	2.42	5	1.73
205027_s_at	MAP3K8	2.42	4.84	1.64
229300_at	RAB3C	2.43	4.93	1.69
235652_at	235652_at	2.43	4.87	1.66
226782_at	SLC25A30	2.43	4.52	1.46
242909_at	242909_at	2.44	5.15	1.82
214636_at	CALCB	2.44	4.8	1.62
213093_at	PRKCA	2.44	4.79	1.61
206281_at	ADCYAP1	2.44	4.3	1.33
238815_at	LRRTM1	2.44	4.31	1.33
219073_s_at	OSBPL10	2.45	4.96	1.71
212724_at	RND3	2.45	4.9	1.67
230951_at	EPB41L5	2.45	4.85	1.65
213050_at	COBL	2.45	4.68	1.55
210519_s_at	NQO1	2.46	5.21	1.85
233536_at	ASXL3	2.46	5.09	1.78
225060_at	LRP11	2.46	4.97	1.71
227817_at	PRKCB	2.46	4.79	1.61
217762_s_at	RAB31	2.46	4.74	1.58
1556213_a_at	BTG3	2.47	5.12	1.8
1561331_at	ERVMER61-1	2.47	5.03	1.75
241698_at	RFTN2	2.47	5.03	1.75
226452_at	PDK1	2.48	4.98	1.72
207680_x_at	PAX3	2.48	4.35	1.36
230464_at	S1PR5	2.49	4.81	1.62
225809_at	PARM1	2.49	4.57	1.49
226863_at	FAM110C	2.5	5.2	1.85
202975_s_at	RHOBTB3	2.5	5.18	1.83
201117_s_at	CPE	2.5	5.09	1.78
207057_at	SLC16A7	2.5	5.06	1.77
209631_s_at	GPR37	2.5	5.07	1.77
235976_at	SLITRK6	2.5	4.55	1.48
227830_at	GABRB3	2.51	5.16	1.82
212741_at	MAOA	2.51	5.05	1.76
209683_at	FAM49A	2.51	5	1.73
237056_at	INSC	2.51	4.67	1.54
204646_at	DPYD	2.51	4.65	1.53
208816_x_at	ANXA2P2	2.52	5.12	1.8
222651_s_at	TRPS1	2.52	4.66	1.54
213988_s_at	SAT1	2.52	4.33	1.35
1554887_at	1554887_at	2.53	4.51	1.46
205234_at	SLC16A4	2.53	4.49	1.44
207981_s_at	ESRRG	2.53	4.32	1.34
225974_at	TMEM64	2.54	5.25	1.87
228598_at	DPP10	2.54	4.9	1.67
226985_at	FGD5	2.54	4.88	1.66
229292_at	EPB41L5	2.54	4.74	1.58
222088_s_at	222088_s_at	2.54	4.56	1.49
226748_at	LYSMD2	2.54	4.48	1.44
231411_at	LHFP	2.54	4.45	1.42
227182_at	SUSD3	2.54	4.41	1.4
210665_at	TFPI	2.55	5.14	1.8
209685_s_at	PRKCB	2.55	5.05	1.76
228080_at	LAYN	2.55	4.95	1.7
227641_at	FBXL16	2.55	4.73	1.58
213455_at	FAM114A1	2.55	4.4	1.39
202800_at	SLC1A3	2.55	4.36	1.37
223423_at	GPR160	2.56	5.22	1.85
202719_s_at	TES	2.56	5.1	1.78
231040_at	231040_at	2.56	4.9	1.67
202497_x_at	SLC2A3	2.57	5.28	1.88
213397_x_at	213397_x_at	2.57	5.14	1.8
218807_at	VAV3	2.57	4.62	1.52
238919_at	238919_at	2.58	4.46	1.42
1554079_at	GALNT18	2.59	5.2	1.85
239457_at	ATP8B3	2.59	4.94	1.7
208065_at	ST8SIA3	2.6	5.22	1.85
204112_s_at	HNMT	2.6	5.08	1.77
203973_s_at	CEBPD	2.61	5.12	1.79
229724_at	GABRB3	2.62	5.33	1.9
219737_s_at	PCDH9	2.62	4.91	1.67
222071_s_at	SLCO4C1	2.62	4.77	1.6
206382_s_at	BDNF	2.64	5.32	1.9
202625_at	LYN	2.64	5.29	1.88
1569178_at	GRIA4	2.64	4.53	1.46
1569796_s_at	ATRNL1	2.64	4.44	1.41
217764_s_at	RAB31	2.65	5.14	1.8
214079_at	DHRS2	2.65	4.83	1.63
1552736_a_at	NETO1	2.65	4.44	1.41
225798_at	JAZF1	2.66	4.94	1.69
235174_s_at	LOC100128822	2.67	4.97	1.71
205030_at	FABP7	2.68	5.33	1.9
224218_s_at	TRPS1	2.68	5.05	1.76
214811_at	RIMBP2	2.68	4.99	1.73
207957_s_at	PRKCB	2.68	4.77	1.6
215271_at	TNN	2.69	4.55	1.47
203323_at	CAV2	2.69	4.48	1.44
204348_s_at	204348_s_at	2.7	4.82	1.63
200878_at	EPAS1	2.71	5.42	1.96
226938_at	DCAF4	2.71	5.23	1.85
1552486_s_at	LACTB	2.71	4.77	1.6
225342_at	225342_at	2.72	4.88	1.66
205749_at	CYP1A1	2.72	4.27	1.3
202720_at	TES	2.73	5.51	1.99
214111_at	OPCML	2.73	4.71	1.57
202620_s_at	PLOD2	2.73	4.63	1.52
209211_at	KLF5	2.73	4.35	1.36
221605_s_at	PIPOX	2.74	5.49	1.99
217707_x_at	SMARCA2	2.74	4.93	1.69
223044_at	SLC40A1	2.74	4.62	1.52
241703_at	RUNDC3B	2.74	4.5	1.45
235570_at	RBMS3	2.75	5.44	1.97
235343_at	VASH2	2.75	5.41	1.96
210664_s_at	TFPI	2.75	5.31	1.89
227062_at	227062_at	2.75	4.87	1.66
203066_at	CHST15	2.76	5.37	1.93
202375_at	SEC24D	2.76	4.88	1.66
201468_s_at	NQO1	2.77	5.21	1.85
225239_at	225239_at	2.77	4.79	1.61
219497_s_at	BCL11A	2.78	4.97	1.71
221773_at	ELK3	2.78	4.39	1.38
209859_at	TRIM9	2.78	4.29	1.32
205029_s_at	FABP7	2.79	5.58	2.03
236180_at	236180_at	2.79	4.66	1.54
242385_at	RORB	2.79	4.49	1.45
208358_s_at	UGT8	2.81	5.19	1.83
205619_s_at	MEOX1	2.82	5.28	1.88
226636_at	PLD1	2.82	4.66	1.54
33323_r_at	SFN	2.83	5.16	1.82
213479_at	NPTX2	2.84	5.45	1.97
230262_at	ST8SIA3	2.84	5.05	1.76
227856_at	C4orf32	2.86	5.45	1.97
224975_at	NFIA	2.86	5.23	1.85
219093_at	PID1	2.86	4.44	1.41
233085_s_at	NABP1	2.88	5.46	1.97
213258_at	TFPI	2.88	4.61	1.51
202619_s_at	PLOD2	2.89	5.34	1.9
230746_s_at	230746_s_at	2.89	4.46	1.43
225173_at	ARHGAP18	2.9	5.66	2.07
212538_at	DOCK9	2.9	5.45	1.97
206167_s_at	ARHGAP6	2.9	5.12	1.8
223282_at	TSHZ1	2.9	4.87	1.66
228780_at	POU3F3	2.9	4.74	1.58
219955_at	L1TD1	2.91	5.2	1.85
237193_s_at	237193_s_at	2.91	4.47	1.43
232226_at	LRRC4C	2.92	5.66	2.07
206309_at	LECT1	2.92	5.23	1.85
238453_at	FGFBP3	2.94	5.66	2.07
200660_at	S100A11	2.94	5.32	1.9
204529_s_at	TOX	2.94	4.9	1.67
219355_at	CXorf57	2.95	5.58	2.04
1557369_a_at	LINC00698	2.95	5.34	1.9
213745_at	ATRNL1	2.97	5.31	1.89
227297_at	ITGA9	2.97	5.26	1.87
219869_s_at	SLC39A8	2.97	4.93	1.69
232481_s_at	SLITRK6	2.98	5.61	2.05
204491_at	PDE4D	2.99	5.31	1.89
219054_at	NPR3	2.99	4.9	1.67
230237_at	ADCYAP1	2.99	4.48	1.44
221801_x_at	NEFL	3	5	1.73
205538_at	CORO2A	3.01	5.75	2.12
222872_x_at	NABP1	3.01	5.66	2.07
225681_at	CTHRC1	3.01	5.51	1.99
233050_at	233050_at	3.01	5.49	1.99
1556629_a_at	SNAP25	3.01	5.07	1.77
209897_s_at	SLIT2	3.02	5.32	1.9
211148_s_at	ANGPT2	3.02	5.22	1.85
244170_at	RAB3C	3.04	5.17	1.83
227742_at	CLIC6	3.05	5.34	1.9
218995_s_at	EDN1	3.05	4.63	1.52
218700_s_at	RAB7L1	3.06	4.86	1.66
218858_at	DEPTOR	3.07	5.74	2.12
221729_at	COL5A2	3.07	5.73	2.11
221916_at	NEFL	3.07	5.62	2.06
206670_s_at	GAD1	3.07	5.51	1.99
211668_s_at	PLAU	3.08	5.69	2.08
226497_s_at	FLT1	3.08	5.63	2.06
213943_at	TWIST1	3.08	5.49	1.99
227177_at	CORO2A	3.08	4.32	1.34
207528_s_at	SLC7A11	3.09	5.3	1.89
1552712_a_at	NMNAT2	3.09	5.23	1.85
218502_s_at	TRPS1	3.1	4.73	1.58
230623_x_at	USP28	3.11	5.84	2.14
231837_at	USP28	3.11	5.18	1.83
204595_s_at	STC1	3.12	5.82	2.13
219474_at	C3orf52	3.12	5.08	1.77
227099_s_at	C11orf96	3.13	5.39	1.94
203001_s_at	STMN2	3.14	5.82	2.13
222446_s_at	BACE2	3.14	5.24	1.86
203397_s_at	GALNT3	3.14	4.75	1.59
226117_at	TIFA	3.14	4.51	1.45
202404_s_at	COL1A2	3.15	5.25	1.87
205278_at	GAD1	3.16	5.84	2.14
228782_at	SCGB3A2	3.17	5.41	1.95
209267_s_at	SLC39A8	3.17	5.3	1.89
209757_s_at	MYCN	3.19	5.5	1.99
205942_s_at	ACSM3	3.19	5.32	1.9
202403_s_at	COL1A2	3.21	5.7	2.08
239738_at	DACH2	3.22	5.27	1.87
231166_at	GPR155	3.23	5.53	2
205923_at	RELN	3.23	5.44	1.97
209469_at	GPM6A	3.23	5.23	1.85
235518_at	SLC8A1	3.23	5.17	1.83
212099_at	RHOB	3.23	4.44	1.41
227703_s_at	SYTL4	3.24	5.6	2.04
205932_s_at	MSX1	3.24	4.72	1.57
226913_s_at	SOX8	3.24	4.69	1.55
204591_at	CHL1	3.24	4.35	1.36
1555878_at	RPS24	3.25	4.57	1.49
207558_s_at	PITX2	3.25	4.53	1.46
221019_s_at	COLEC12	3.26	5.27	1.87
222747_s_at	SCML1	3.27	5.96	2.22
202936_s_at	SOX9	3.27	5.01	1.74
203000_at	STMN2	3.28	5.97	2.22
209392_at	ENPP2	3.29	5.03	1.75
227210_at	SFMBT2	3.3	5.91	2.19
238877_at	EYA4	3.3	5.14	1.8
231798_at	NOG	3.31	5.05	1.76
219195_at	PPARGC1A	3.32	5.96	2.22
222108_at	AMIGO2	3.33	5.88	2.17
212510_at	GPD1L	3.33	5.8	2.13
227202_at	CNTN1	3.33	5.82	2.13
209480_at	HLA-DQB1	3.33	5.31	1.9
206653_at	POLR3G	3.33	5.03	1.75
201131_s_at	CDH1	3.33	4.98	1.72
210292_s_at	210292_s_at	3.34	4.4	1.39
204518_s_at	PPIC	3.35	4.94	1.69
223962_at	TTC29	3.36	5.55	2.01
225171_at	ARHGAP18	3.38	5.97	2.22
204932_at	TNFRSF11B	3.39	5.52	1.99
206701_x_at	EDNRB	3.39	5.1	1.79
211470_s_at	SULT1C2	3.4	5.79	2.13
213601_at	213601_at	3.4	5.68	2.07
209966_x_at	ESRRG	3.4	4.54	1.47
221730_at	COL5A2	3.42	5.43	1.97
232720_at	LINGO2	3.44	5.53	2
230130_at	SLIT2	3.44	5.21	1.85
209921_at	SLC7A11	3.44	4.81	1.62
237034_at	237034_at	3.45	5.05	1.76
226225_at	MCC	3.46	5.53	2
213285_at	TMEM30B	3.49	4.5	1.45
210839_s_at	ENPP2	3.5	5.66	2.07
209676_at	TFPI	3.51	5.85	2.15
208606_s_at	WNT4	3.52	5.17	1.83
206310_at	SPINK2	3.53	5.29	1.88
227399_at	VGLL3	3.58	5.88	2.17
227410_at	FAM43A	3.58	4.63	1.52
205479_s_at	PLAU	3.59	5.94	2.21
236894_at	L1TD1	3.59	5.51	1.99
227238_at	MUC15	3.59	5.47	1.98
226448_at	226448_at	3.6	5.35	1.91
227209_at	CNTN1	3.61	5.49	1.99
223734_at	MGARP	3.61	4.69	1.55
1552678_a_at	USP28	3.63	5.03	1.75
227612_at	ELAVL3	3.64	5.55	2.01
1555355_a_at	ETS1	3.64	5.24	1.86
210643_at	TNFSF11	3.65	6.24	2.34
207679_at	PAX3	3.65	5.65	2.07
218793_s_at	SCML1	3.67	5.71	2.09
206941_x_at	SEMA3E	3.68	4.86	1.66
1556638_at	PAX7	3.7	5.75	2.12
239911_at	ONECUT2	3.7	5.78	2.12
219064_at	ITIH5	3.7	5.59	2.04
205738_s_at	FABP3	3.71	5.67	2.07
239572_at	GJA3	3.72	6.1	2.27
221805_at	NEFL	3.73	6.09	2.27
228850_s_at	SLIT2	3.73	4.91	1.67
232151_at	MACC1	3.75	6.18	2.32
205609_at	ANGPT1	3.75	4.81	1.62
230372_at	HAS2	3.76	5.47	1.98
202935_s_at	SOX9	3.77	5.18	1.83
230303_at	SYNPR	3.78	5.39	1.94
210377_at	ACSM3	3.8	5.52	2
229218_at	COL1A2	3.8	4.99	1.72
213373_s_at	CASP8	3.81	5.27	1.87
1552658_a_at	NAV3	3.82	5.83	2.14
204597_x_at	STC1	3.84	6.07	2.27
212681_at	EPB41L3	3.84	5.2	1.85
217678_at	SLC7A11	3.84	4.68	1.55
206552_s_at	TAC1	3.86	6.2	2.33
227862_at	TRNP1	3.86	6.08	2.27
211776_s_at	EPB41L3	3.87	6.24	2.34
204823_at	NAV3	3.9	5.75	2.12
209470_s_at	GPM6A	3.92	5.99	2.22
206710_s_at	EPB41L3	3.93	5.17	1.83
206239_s_at	SPINK1	3.93	5.13	1.8
226751_at	CNRIP1	3.94	5.94	2.21
227627_at	227627_at	3.95	6.41	2.43
229963_at	BEX5	3.95	6.16	2.31
205626_s_at	CALB1	3.96	6.07	2.27
204517_at	PPIC	3.96	5.05	1.76
209406_at	BAG2	4.03	6.11	2.28
203786_s_at	TPD52L1	4.03	6.01	2.24
1554526_at	OLFM3	4.05	5.67	2.07
201005_at	CD9	4.06	6.01	2.24
228293_at	DEPDC7	4.07	6.37	2.42
1566766_a_at	MACC1	4.08	5.68	2.07
200872_at	S100A10	4.09	6.28	2.36
229580_at	229580_at	4.09	5.11	1.79
214974_x_at	CXCL5	4.09	4.56	1.48
1553613_s_at	FOXC1	4.11	5.81	2.13
228796_at	CPNE4	4.12	5.07	1.77
204471_at	GAP43	4.14	6.15	2.31
216059_at	PAX3	4.14	5.26	1.87
213503_x_at	ANXA2	4.15	6.41	2.43
237911_at	237911_at	4.16	5	1.73
201963_at	ACSL1	4.18	5.76	2.12
228964_at	PRDM1	4.19	5.01	1.74
212188_at	KCTD12	4.21	5.76	2.12
210427_x_at	ANXA2	4.22	6.4	2.43
238447_at	RBMS3	4.22	6.19	2.32
201590_x_at	ANXA2	4.24	6.42	2.43
209160_at	AKR1C3	4.26	5.49	1.99
226534_at	KITLG	4.27	6.42	2.43
222891_s_at	BCL11A	4.27	6.26	2.35
226498_at	FLT1	4.29	5.47	1.98
220038_at	220038_at	4.33	6.01	2.24
218656_s_at	LHFP	4.33	5.96	2.22
230895_at	HAPLN1	4.36	6.5	2.43
203649_s_at	PLA2G2A	4.36	4.72	1.58
209755_at	NMNAT2	4.4	5.95	2.21
231666_at	PAX3	4.4	4.9	1.67
228956_at	UGT8	4.42	5.59	2.04
210319_x_at	MSX2	4.42	4.76	1.59
204273_at	EDNRB	4.43	6.22	2.33
1564413_at	FLJ36116	4.43	5.79	2.13
204271_s_at	EDNRB	4.5	5.48	1.99
212614_at	ARID5B	4.52	6.59	2.5
204115_at	GNG11	4.53	6.02	2.24
202202_s_at	LAMA4	4.53	5.29	1.88
240055_at	240055_at	4.54	5.66	2.07
239975_at	HLA-DPB2	4.56	5.48	1.98
232054_at	PCDH20	4.58	6.02	2.24
1554547_at	FAM13C	4.59	6.68	2.54
203799_at	203799_at	4.66	6.66	2.53
203789_s_at	SEMA3C	4.66	5.76	2.12
202286_s_at	TACSTD2	4.67	6.31	2.38
205342_s_at	SULT1C2	4.68	5.8	2.13
226302_at	ATP8B1	4.69	6.18	2.32
1554524_a_at	OLFM3	4.7	6.07	2.27
222802_at	EDN1	4.82	5.63	2.06
243555_at	243555_at	4.83	5.46	1.98
206280_at	CDH18	4.88	6.66	2.53
206432_at	HAS2	4.94	5.49	1.99
219814_at	MBNL3	5.01	6.55	2.48
205113_at	NEFM	5.03	4.78	1.61
210372_s_at	TPD52L1	5.04	6.02	2.24
205572_at	ANGPT2	5.09	6.27	2.36
226213_at	ERBB3	5.12	4.39	1.38
209200_at	MEF2C	5.2	6.36	2.42
205287_s_at	TFAP2C	5.2	4.74	1.58
205524_s_at	HAPLN1	5.22	6.86	2.63
209199_s_at	MEF2C	5.22	6.45	2.43
201860_s_at	PLAT	5.27	5.58	2.04
228335_at	CLDN11	5.3	5.9	2.18
205286_at	TFAP2C	5.32	6.84	2.62
229498_at	MBNL3	5.43	6.62	2.5
1556421_at	LOC286189	5.44	6.79	2.61
219179_at	DACT1	5.44	6.16	2.31
230765_at	KIAA1239	5.57	5.79	2.13
242344_at	GABRB2	5.59	5.68	2.07
209875_s_at	SPP1	5.6	5.38	1.93
209803_s_at	PHLDA2	5.61	6.96	2.64
228716_at	THRB	5.66	6.74	2.58
201324_at	EMP1	5.69	5.99	2.22
204464_s_at	EDNRA	5.69	5.26	1.87
229004_at	ADAMTS15	5.69	5.02	1.75
218468_s_at	GREM1	5.75	6.89	2.64
202454_s_at	ERBB3	5.8	6.36	2.42
207729_at	CDH9	5.83	5.62	2.06
242871_at	PAQR5	5.86	5.79	2.13
214265_at	ITGA8	5.87	5.94	2.21
206001_at	NPY	5.93	6.41	2.43
236045_x_at	236045_x_at	5.95	7.08	2.7
206286_s_at	206286_s_at	6.03	6.21	2.33
241550_at	DPPA5	6.05	5.03	1.75
206332_s_at	IFI16	6.08	6.73	2.58
228635_at	PCDH10	6.2	7.01	2.67
213107_at	TNIK	6.21	7.08	2.7
210145_at	PLA2G4A	6.23	6.61	2.5
218469_at	GREM1	6.23	6.44	2.43
232116_at	GRHL3	6.25	6.11	2.28
208096_s_at	COL21A1	6.27	6.8	2.61
216259_at	LOC100506699	6.44	5.1	1.78
236359_at	SCN4B	6.65	6.9	2.64
213109_at	TNIK	6.66	7.03	2.68
235666_at	ITGA8	6.68	6.58	2.5
226281_at	DNER	6.8	6.86	2.63
202436_s_at	CYP1B1	6.87	7.34	2.84
209840_s_at	LRRN3	6.87	6.36	2.42
202435_s_at	CYP1B1	7	7.32	2.84
230423_at	230423_at	7.01	7.41	2.84
208966_x_at	IFI16	7.06	7.14	2.72
209687_at	CXCL12	7.21	6.26	2.35
209841_s_at	LRRN3	7.43	6.92	2.64
212192_at	KCTD12	7.45	7.35	2.84
218589_at	LPAR6	7.65	7.42	2.84
229125_at	KANK4	7.77	6.48	2.43
205431_s_at	BMP5	8.31	7.66	2.84
208965_s_at	IFI16	8.85	7.19	2.75
202508_s_at	SNAP25	8.99	7.37	2.84
230204_at	HAPLN1	8.99	7.37	2.84
211828_s_at	TNIK	9.21	6.9	2.64
204463_s_at	EDNRA	9.52	5.12	1.8
209723_at	SERPINB9	9.69	7.43	2.84
238914_at	DCC	9.73	7.47	2.84
241986_at	BMPER	9.76	7.29	2.83
202437_s_at	CYP1B1	9.85	6.93	2.64
237375_at	237375_at	10.56	7.71	2.84
220184_at	NANOG	10.65	7.04	2.68
205523_at	HAPLN1	10.69	6.42	2.43
1559280_a_at	LOC100506013	11.18	6.81	2.61
228875_at	FAM162B	12.14	7.41	2.84
205430_at	BMP5	12.66	7.39	2.84
243610_at	C9orf135	13.84	6.6	2.5
224833_at	ETS1	13.94	7.74	2.84
1553394_a_at	TFAP2B	14.83	7.82	2.84
239206_at	CR1L	16.12	7.37	2.84
204653_at	TFAP2A	16.76	7.42	2.84
214451_at	TFAP2B	18.38	8.39	3.05
213139_at	SNAI2	21.63	8.38	3.05
241612_at	FOXD3	22.65	8.55	3.05
239205_s_at	239205_s_at	33.32	7.84	2.84

## Sheet: 550
550 µM VPA
ID	symbol	fold change	-log(p-value)	-log(p-value) BY-adjusted
221086_s_at	FEZF2	0.05	8.04	3.86
233972_s_at	FEZF2	0.07	7.09	3.38
229085_at	LRRC3B	0.1	7.88	3.77
238661_at	LOC100130155	0.13	7.61	3.69
243929_at	243929_at	0.13	7.72	3.69
219197_s_at	SCUBE2	0.13	7.38	3.53
242193_at	LOC100130155	0.13	6.76	3.23
1555801_s_at	ZNF385B	0.14	7.66	3.69
1554314_at	C6orf141	0.14	6.54	3.11
242054_s_at	SIX3	0.15	8.03	3.86
210303_at	MAB21L2	0.15	8	3.85
238878_at	ARX	0.15	6.33	2.98
210179_at	KCNJ13	0.16	7.03	3.38
1555800_at	ZNF385B	0.16	6.72	3.21
237472_at	SOX1	0.16	5.9	2.7
206140_at	LHX2	0.16	5.58	2.48
231898_x_at	SOX2-OT	0.17	7.6	3.68
1554012_at	RSPO2	0.17	7.05	3.38
206588_at	DAZL	0.17	7.05	3.38
228658_at	MIAT	0.18	7.57	3.67
213913_s_at	TBC1D30	0.18	7.07	3.38
243672_at	SALL3	0.18	6.88	3.29
238755_at	RASSF10	0.18	6.4	3.02
211427_s_at	KCNJ13	0.18	6.23	2.92
230785_at	230785_at	0.18	6.09	2.83
213912_at	TBC1D30	0.19	7.4	3.55
237322_at	MIAT	0.19	7.3	3.5
238625_at	C1orf168	0.19	6.25	2.93
220087_at	BCMO1	0.2	7.36	3.52
1561969_at	ZPLD1	0.2	7	3.36
232847_at	SALL3	0.2	6.49	3.08
1553447_at	AGBL1	0.2	6.19	2.9
207443_at	NR2E1	0.21	6.95	3.33
1553411_s_at	SALL3	0.21	6.4	3.01
204424_s_at	LMO3	0.21	5.52	2.44
1556378_a_at	LOC440896	0.21	4.88	2.02
219557_s_at	NRIP3	0.22	7.38	3.53
239230_at	HES5	0.22	6.42	3.03
227168_at	MIAT	0.22	6.37	3
1553202_at	STOX1	0.22	6.05	2.8
230889_at	LOC645321	0.22	5.94	2.73
230493_at	SHISA2	0.23	7.04	3.38
210302_s_at	MAB21L2	0.23	6.9	3.29
222900_at	NRIP3	0.23	6.76	3.23
1558388_a_at	UG0898H09	0.23	6.32	2.97
220519_s_at	LIM2	0.23	5.61	2.5
1552575_a_at	C6orf141	0.24	7.07	3.38
230045_at	CNTN2	0.24	6.76	3.23
202219_at	SLC6A8	0.24	6.19	2.89
230147_at	F2RL2	0.25	7	3.36
1552521_a_at	TMEM74	0.25	6.96	3.33
226279_at	PRSS23	0.25	6.7	3.2
227195_at	ZNF503	0.25	6.49	3.08
210493_s_at	MFAP3L	0.25	6.42	3.03
244061_at	244061_at	0.25	5.64	2.53
229441_at	PRSS23	0.26	6.89	3.29
1552520_at	TMEM74	0.26	6.75	3.23
229378_at	STOX1	0.26	5.29	2.3
229019_at	ZNF385B	0.27	6.68	3.18
221245_s_at	FZD5	0.27	6.39	3.01
1558387_at	UG0898H09	0.27	5.35	2.33
206634_at	SIX3	0.28	6.56	3.11
229435_at	GLIS3	0.28	6.34	2.99
208345_s_at	POU3F1	0.28	6.26	2.94
224774_s_at	NAV1	0.28	6.01	2.77
239556_at	LOC645513	0.28	5.81	2.64
232826_at	232826_at	0.28	5.46	2.41
202458_at	PRSS23	0.29	6.5	3.08
244116_at	244116_at	0.29	6.44	3.04
203868_s_at	VCAM1	0.29	6.09	2.83
221029_s_at	WNT5B	0.29	5.77	2.62
205710_at	LRP2	0.29	5.72	2.59
230863_at	LRP2	0.29	5.27	2.28
207103_at	KCND2	0.29	5.15	2.2
213843_x_at	SLC6A8	0.3	6.27	2.94
224242_at	GALP	0.3	6.13	2.86
223468_s_at	RGMA	0.3	6.08	2.82
230776_at	RNF157-AS1	0.3	5.11	2.17
205646_s_at	PAX6	0.31	6.33	2.98
1570335_at	1570335_at	0.31	4.62	1.84
235795_at	PAX6	0.32	6.37	3
243996_at	243996_at	0.32	6.15	2.87
206157_at	PTX3	0.32	6.07	2.82
205442_at	MFAP3L	0.32	5.6	2.5
224773_at	NAV1	0.32	5.57	2.48
209618_at	CTNND2	0.32	4.57	1.81
243193_at	243193_at	0.33	5.53	2.45
215483_at	AKAP9	0.33	4.97	2.08
1564383_s_at	FLJ35934	0.34	5.81	2.65
231731_at	OTX2	0.34	5.79	2.63
238455_at	238455_at	0.34	5.7	2.58
209560_s_at	DLK1	0.34	5.69	2.57
1557945_at	TCTE3	0.34	5.58	2.49
202283_at	SERPINF1	0.34	5.58	2.49
239280_at	239280_at	0.35	6.15	2.87
1552296_at	BEST4	0.35	6.03	2.79
206343_s_at	NRG1	0.35	5.47	2.42
235004_at	RBM24	0.35	5.47	2.42
223122_s_at	SFRP2	0.35	5.34	2.33
210854_x_at	SLC6A8	0.35	5.25	2.26
230809_at	230809_at	0.35	5.19	2.22
1556659_at	1556659_at	0.36	5.87	2.68
210381_s_at	CCKBR	0.36	5.61	2.51
224772_at	NAV1	0.36	5.5	2.43
1560652_at	1560652_at	0.36	5.38	2.36
227584_at	NAV1	0.36	5.23	2.25
222058_at	RNF130	0.36	4.94	2.06
236297_at	236297_at	0.36	4.93	2.05
228407_at	SCUBE3	0.36	4.22	1.57
230258_at	GLIS3	0.37	5.87	2.68
214774_x_at	TOX3	0.37	5.48	2.42
230928_at	230928_at	0.37	5.39	2.36
225627_s_at	CACHD1	0.37	5.1	2.17
1559067_a_at	LOC158402	0.37	4.99	2.09
206731_at	CNKSR2	0.37	4.91	2.04
208215_x_at	DRD4	0.37	4.91	2.04
235422_at	235422_at	0.37	4.91	2.04
206843_at	CRYBA4	0.37	4.62	1.84
237435_at	237435_at	0.37	4.58	1.81
210095_s_at	IGFBP3	0.37	4.35	1.65
215071_s_at	HIST1H2AC	0.38	5.87	2.68
202708_s_at	HIST2H2BE	0.38	5.62	2.52
228018_at	NKAIN4	0.38	5.6	2.5
228032_s_at	DENND1B	0.38	5.55	2.46
244133_at	USP49	0.38	5.53	2.45
219696_at	DENND1B	0.38	5.43	2.39
1552811_at	WFIKKN1	0.38	5.36	2.34
238318_at	238318_at	0.38	5.3	2.31
204663_at	ME3	0.38	5.18	2.22
223552_at	LRRC4	0.38	4.94	2.06
209220_at	GPC3	0.38	4.91	2.04
209806_at	HIST1H2BK	0.39	5.73	2.59
235456_at	235456_at	0.39	5.54	2.46
215108_x_at	TOX3	0.39	5.49	2.43
229092_at	NR2F2	0.39	5.5	2.43
217028_at	CXCR4	0.39	5.45	2.41
229661_at	SALL4	0.39	5.46	2.41
216623_x_at	TOX3	0.39	5.41	2.38
233241_at	PLK1S1	0.39	5.35	2.34
203845_at	KAT2B	0.39	5.16	2.21
206209_s_at	CA4	0.39	5.06	2.14
230076_at	PITPNM3	0.39	5.07	2.14
231230_at	KCNK10	0.39	4.82	1.98
212062_at	ATP9A	0.39	4.72	1.91
242007_at	242007_at	0.39	4.67	1.87
224508_at	MGC12916	0.39	4.46	1.73
233977_at	GREB1L	0.39	4.24	1.57
243865_x_at	243865_x_at	0.39	3.85	1.32
238787_at	DENND1B	0.4	5.66	2.55
242128_at	OTX2	0.4	5.65	2.54
213010_at	PRKCDBP	0.4	5.64	2.53
228017_s_at	NKAIN4	0.4	5.61	2.51
229302_at	TMEM178A	0.4	5.42	2.38
244045_at	244045_at	0.4	5.09	2.15
210492_at	MFAP3L	0.4	4.98	2.09
213353_at	ABCA5	0.4	4.85	1.99
227361_at	HS3ST3B1	0.4	4.73	1.91
226665_at	AHSA2	0.4	4.67	1.88
241962_at	241962_at	0.4	4.64	1.85
235500_at	HNRNPC	0.4	4.45	1.72
232453_at	232453_at	0.4	3.88	1.33
1563899_at	LCTL	0.41	5.49	2.43
205659_at	HDAC9	0.41	5.44	2.39
237044_s_at	ZNF503-AS2	0.41	5.41	2.38
203441_s_at	CDH2	0.41	5.34	2.33
228081_at	CCNG2	0.41	5.28	2.29
238098_at	238098_at	0.41	5.2	2.24
223121_s_at	SFRP2	0.41	5.13	2.18
224219_s_at	TRPC4	0.41	5.09	2.16
242253_at	PPP5D1	0.41	4.98	2.08
1562633_at	RMST	0.41	4.91	2.04
213721_at	SOX2	0.41	4.82	1.98
240259_at	240259_at	0.41	4.79	1.96
205041_s_at	205041_s_at	0.41	4.78	1.95
222217_s_at	SLC27A3	0.41	4.64	1.85
242120_at	242120_at	0.41	4.41	1.7
1558508_a_at	C1orf53	0.41	4.35	1.65
1560525_at	1560525_at	0.41	4.1	1.48
230198_at	230198_at	0.41	4.08	1.47
220663_at	IL1RAPL1	0.41	3.83	1.31
218870_at	ARHGAP15	0.42	5.49	2.43
213283_s_at	SALL2	0.42	5.31	2.31
226884_at	LRRN1	0.42	5.28	2.29
214058_at	MYCL1	0.42	5.21	2.24
202037_s_at	SFRP1	0.42	5.16	2.21
225487_at	TMEM18	0.42	4.82	1.98
212606_at	WDFY3	0.42	4.65	1.86
237305_at	237305_at	0.42	4.54	1.78
231088_at	MORF4L2-AS1	0.42	4.24	1.58
1555318_at	HIF3A	0.42	4.17	1.53
242986_at	NAV1	0.42	4.16	1.53
215554_at	GPLD1	0.42	4.12	1.5
235593_at	ZEB2	0.42	4.07	1.47
242518_at	LOC100505648	0.42	4.04	1.44
231738_at	PCDHB7	0.42	3.99	1.41
202770_s_at	CCNG2	0.43	5.39	2.37
238785_at	238785_at	0.43	5.34	2.33
210962_s_at	AKAP9	0.43	5.29	2.3
211559_s_at	CCNG2	0.43	5.29	2.29
228885_at	MAMDC2	0.43	5.24	2.26
227020_at	YPEL2	0.43	5.1	2.16
231899_at	ZC3H12C	0.43	5.04	2.12
204914_s_at	SOX11	0.43	4.93	2.05
236501_at	236501_at	0.43	4.87	2.01
232989_s_at	CCDC136	0.43	4.82	1.98
240713_s_at	240713_s_at	0.43	4.8	1.96
229351_at	229351_at	0.43	4.63	1.85
213241_at	PLXNC1	0.43	4.59	1.82
1557667_at	1557667_at	0.43	4.53	1.78
233753_at	SCAF4	0.43	4.53	1.78
1566152_a_at	1566152_a_at	0.43	4.45	1.72
1561158_at	1561158_at	0.43	4.29	1.61
224215_s_at	DLL1	0.43	4.25	1.58
224771_at	NAV1	0.43	4.25	1.58
243049_at	243049_at	0.43	4.09	1.47
212427_at	KIAA0368	0.43	3.92	1.36
237444_at	KIF13A	0.43	3.87	1.33
239903_at	TPBG	0.44	5.28	2.29
203829_at	ELP4	0.44	5.24	2.26
230148_at	AHSA2	0.44	5.25	2.26
230293_at	MEAF6	0.44	5.24	2.26
226096_at	FNDC5	0.44	5.15	2.2
206136_at	FZD5	0.44	5.12	2.18
204915_s_at	SOX11	0.44	5.05	2.13
210220_at	FZD2	0.44	4.86	2
228387_at	LOC100996511	0.44	4.71	1.9
237449_at	SP8	0.44	4.53	1.78
220340_at	GREB1L	0.44	4.42	1.7
238129_s_at	FZD2	0.44	4.37	1.66
1555074_a_at	KCNH5	0.44	4.11	1.49
224507_s_at	MGC12916	0.44	4.1	1.48
237885_at	SOX21-AS1	0.45	5.24	2.26
211919_s_at	CXCR4	0.45	5.23	2.25
202769_at	CCNG2	0.45	5.2	2.23
209911_x_at	HIST1H2BD	0.45	5.12	2.17
230721_at	230721_at	0.45	5.08	2.15
65472_at	C2orf68	0.45	4.98	2.09
217574_at	CDH8	0.45	4.87	2.01
243806_at	243806_at	0.45	4.86	2
218113_at	TMEM2	0.45	4.75	1.93
243243_at	GPC3	0.45	4.56	1.79
202766_s_at	FBN1	0.45	4.35	1.66
223161_at	KIAA1147	0.45	4.16	1.53
202350_s_at	202350_s_at	0.45	4.15	1.52
208015_at	SMAD1	0.45	4.05	1.45
1559283_a_at	CNPY1	0.45	3.88	1.34
227697_at	SOCS3	0.46	5.11	2.17
235072_s_at	KIF13A	0.46	5.06	2.14
210006_at	ABHD14A	0.46	5.06	2.13
225975_at	PCDH18	0.46	4.98	2.08
244427_at	KIF23	0.46	4.9	2.03
205206_at	KAL1	0.46	4.84	1.99
220302_at	MAK	0.46	4.8	1.96
241017_at	241017_at	0.46	4.8	1.96
204121_at	GADD45G	0.46	4.68	1.88
229452_at	TMEM88	0.46	4.66	1.86
235217_at	LOC100216546	0.46	4.64	1.85
220887_at	CCDC177	0.46	4.46	1.73
223915_at	BCOR	0.46	4.43	1.71
241972_at	ZNF674-AS1	0.46	4.37	1.66
236909_at	CCDC173	0.46	4.33	1.64
242239_at	ARL5B-AS1	0.46	4.23	1.57
242523_at	242523_at	0.46	4.23	1.57
236270_at	NFATC4	0.46	4.22	1.56
212354_at	SULF1	0.46	4.09	1.48
208579_x_at	208579_x_at	0.47	5.03	2.12
1555982_at	ZFYVE16	0.47	4.9	2.04
222106_at	PRND	0.47	4.9	2.04
207357_s_at	GALNT10	0.47	4.84	1.99
230865_at	LIX1	0.47	4.82	1.98
219820_at	SLC6A16	0.47	4.73	1.91
239209_at	239209_at	0.47	4.7	1.89
244490_at	LOC100996511	0.47	4.64	1.85
228210_at	NXPH3	0.47	4.54	1.78
222784_at	SMOC1	0.47	4.5	1.75
227870_at	IGDCC4	0.47	4.5	1.75
207724_s_at	SPAST	0.47	4.49	1.74
244802_at	244802_at	0.47	4.47	1.73
243322_at	243322_at	0.47	4.34	1.65
226972_s_at	CCDC136	0.47	4.33	1.64
229086_at	C1orf213	0.47	4.33	1.64
212806_at	PRUNE2	0.47	4.29	1.61
214012_at	ERAP1	0.47	4.09	1.48
233309_at	233309_at	0.47	4.1	1.48
1554636_at	1554636_at	0.47	3.83	1.31
238712_at	238712_at	0.47	3.82	1.3
202036_s_at	SFRP1	0.48	4.98	2.08
215812_s_at	215812_s_at	0.48	4.92	2.05
220390_at	AGBL2	0.48	4.86	2.01
202035_s_at	SFRP1	0.48	4.85	2
209201_x_at	CXCR4	0.48	4.82	1.98
203440_at	CDH2	0.48	4.8	1.96
212549_at	STAT5B	0.48	4.72	1.91
220818_s_at	TRPC4	0.48	4.69	1.89
223162_s_at	KIAA1147	0.48	4.64	1.85
228826_at	BZRAP1-AS1	0.48	4.61	1.84
229782_at	RMST	0.48	4.57	1.81
1555388_s_at	SNX25	0.48	4.43	1.71
209617_s_at	CTNND2	0.48	4.43	1.71
242292_at	FAM226B	0.48	4.44	1.71
239005_at	239005_at	0.48	4.38	1.67
239347_at	239347_at	0.48	4.38	1.67
1554607_at	CNKSR2	0.48	4.36	1.66
244294_at	GTF2H5	0.48	4.36	1.66
238983_at	NSUN7	0.48	4.31	1.62
210945_at	COL4A6	0.48	4.27	1.6
211267_at	HESX1	0.48	4.26	1.59
1562957_at	1562957_at	0.48	4.21	1.56
228494_at	PPP1R9A	0.48	4.19	1.55
228412_at	LOC643072	0.48	4.14	1.51
227351_at	C16orf52	0.48	4.11	1.49
225511_at	GPRC5B	0.48	3.93	1.37
210447_at	GLUD2	0.49	4.87	2.01
238946_at	238946_at	0.49	4.86	2
224800_at	WDFY1	0.49	4.82	1.98
240317_at	PCDHB4	0.49	4.82	1.98
228038_at	SOX2	0.49	4.71	1.9
227812_at	TNFRSF19	0.49	4.65	1.86
244271_at	244271_at	0.49	4.66	1.86
228296_at	YPEL1	0.49	4.6	1.83
1554328_at	STXBP4	0.49	4.58	1.81
214393_at	RND2	0.49	4.43	1.71
236917_at	LRRC34	0.49	4.44	1.71
228762_at	LFNG	0.49	4.31	1.63
241769_at	241769_at	0.49	4.32	1.63
220817_at	TRPC4	0.49	4.26	1.59
242563_at	242563_at	0.49	4.22	1.57
243332_at	243332_at	0.49	4.16	1.53
222016_s_at	ZSCAN31	0.49	4.08	1.47
236219_at	SLC35G1	0.49	4.05	1.45
236343_at	236343_at	0.49	4.05	1.45
243528_at	243528_at	0.49	3.93	1.37
232424_at	PRDM16	0.49	3.86	1.33
205839_s_at	BZRAP1	0.5	4.78	1.95
229060_at	YPEL2	0.5	4.72	1.91
238633_at	EPC1	0.5	4.58	1.81
227059_at	GPC6	0.5	4.56	1.8
1561319_at	OTX2-AS1	0.5	4.53	1.78
201826_s_at	SCCPDH	0.5	4.54	1.78
230296_at	C16orf52	0.5	4.52	1.77
218376_s_at	MICAL1	0.5	4.5	1.76
228560_at	228560_at	0.5	4.47	1.74
235939_at	235939_at	0.5	4.47	1.74
236214_at	FAM71F1	0.5	4.41	1.7
227943_at	227943_at	0.5	4.39	1.68
1557438_at	1557438_at	0.5	4.31	1.62
219314_s_at	ZNF219	0.5	4.3	1.62
209120_at	NR2F2	0.5	4.25	1.58
227499_at	FZD3	0.5	4.24	1.57
212875_s_at	C2CD2	0.5	4.08	1.47
213145_at	FBXL14	0.5	4.05	1.45
1556257_at	LOC645513	0.5	4.02	1.43
208241_at	NRG1	0.5	3.94	1.38
235315_at	TSC22D1	0.5	3.93	1.37
227610_at	TSPAN11	0.51	4.69	1.89
239649_at	239649_at	0.51	4.68	1.88
222963_s_at	IL1RAPL1	0.51	4.62	1.84
212805_at	PRUNE2	0.51	4.56	1.8
1560906_at	1560906_at	0.51	4.49	1.74
1554507_at	NAALAD2	0.51	4.43	1.71
203562_at	FEZ1	0.51	4.41	1.7
219029_at	C5orf28	0.51	4.38	1.67
1556160_a_at	1556160_a_at	0.51	4.36	1.66
210892_s_at	GTF2I	0.51	4.36	1.66
205109_s_at	ARHGEF4	0.51	4.26	1.59
239545_at	239545_at	0.51	4.21	1.56
215073_s_at	NR2F2	0.51	4.14	1.52
213722_at	SOX2	0.51	4.09	1.48
231449_at	231449_at	0.51	4.06	1.46
236668_at	236668_at	0.51	4.06	1.46
236032_at	236032_at	0.51	4.02	1.43
230375_at	PNISR	0.51	3.95	1.39
212143_s_at	IGFBP3	0.51	3.94	1.37
220727_at	KCNK10	0.51	3.92	1.36
211165_x_at	EPHB2	0.51	3.9	1.35
220546_at	MLL	0.51	3.83	1.31
51158_at	FAM174B	0.52	4.59	1.81
230589_at	TRAF3IP2-AS1	0.52	4.55	1.79
228788_at	YPEL1	0.52	4.51	1.76
231061_at	231061_at	0.52	4.5	1.76
243010_at	MSI2	0.52	4.44	1.72
210222_s_at	RTN1	0.52	4.43	1.71
1563975_at	RNF130	0.52	4.41	1.7
235226_at	CDK19	0.52	4.36	1.66
206718_at	LMO1	0.52	4.33	1.64
229706_at	TCERG1	0.52	4.26	1.59
231325_at	UNC5D	0.52	4.24	1.57
238115_at	DNAJC18	0.52	4.21	1.56
204913_s_at	SOX11	0.52	4.12	1.5
233985_x_at	PPP1R9A	0.52	4.1	1.49
203384_s_at	GOLGA1	0.52	4.1	1.48
226210_s_at	MEG3	0.52	4.03	1.44
207426_s_at	TNFSF4	0.52	4.02	1.43
227524_at	FZD3	0.52	4	1.42
235928_at	ZNF503-AS2	0.52	4	1.42
209121_x_at	NR2F2	0.52	3.98	1.4
215491_at	MYCL1	0.52	3.93	1.37
1555842_at	CYTH2	0.52	3.92	1.36
202765_s_at	FBN1	0.52	3.92	1.36
227525_at	GLCCI1	0.52	3.87	1.33
204671_s_at	ANKRD6	0.52	3.85	1.31
225921_at	NIN	0.52	3.83	1.3
230932_at	230932_at	0.52	3.82	1.3
229411_at	PNCK	0.53	4.5	1.75
226588_at	CWC22	0.53	4.45	1.72
226444_at	226444_at	0.53	4.44	1.71
203413_at	NELL2	0.53	4.41	1.7
236273_at	NBPF1	0.53	4.41	1.69
230668_at	NKAIN4	0.53	4.38	1.67
221880_s_at	FAM174B	0.53	4.36	1.66
227502_at	227502_at	0.53	4.32	1.63
238501_at	238501_at	0.53	4.31	1.63
244218_at	244218_at	0.53	4.32	1.63
220474_at	SLC25A21	0.53	4.3	1.62
221088_s_at	PPP1R9A	0.53	4.24	1.57
207437_at	NOVA1	0.53	4.22	1.56
1554686_at	STAU2	0.53	4.19	1.55
229672_at	UQCC	0.53	4.2	1.55
1558600_a_at	1558600_a_at	0.53	4.19	1.54
1552739_s_at	ST7L	0.53	4.17	1.53
215259_s_at	CADM4	0.53	4.17	1.53
228980_at	228980_at	0.53	4.16	1.53
236918_s_at	LRRC34	0.53	4.11	1.49
221901_at	KIAA1644	0.53	4.04	1.44
1553167_a_at	SEPSECS	0.53	4.02	1.43
204153_s_at	MFNG	0.53	3.93	1.37
203476_at	TPBG	0.53	3.92	1.36
1558754_at	ZNF763	0.53	3.87	1.33
230939_at	LOC100996457	0.53	3.82	1.3
226192_at	AR	0.54	4.4	1.69
236163_at	LIX1	0.54	4.4	1.68
242590_at	242590_at	0.54	4.37	1.66
202137_s_at	ZMYND11	0.54	4.33	1.64
227408_s_at	SNX25	0.54	4.34	1.64
209074_s_at	FAM107A	0.54	4.32	1.63
203485_at	RTN1	0.54	4.31	1.62
1564164_at	DENND1B	0.54	4.26	1.59
212905_at	CSTF2T	0.54	4.26	1.59
235697_at	235697_at	0.54	4.26	1.59
236555_at	TRAF3IP2-AS1	0.54	4.26	1.59
227276_at	PLXDC2	0.54	4.24	1.57
227575_s_at	NRDE2	0.54	4.24	1.57
238799_at	ATP5S	0.54	4.24	1.57
225191_at	CIRBP	0.54	4.18	1.54
1569785_at	1569785_at	0.54	4.17	1.53
233202_at	CNTNAP3	0.54	4.15	1.52
242053_at	242053_at	0.54	4.13	1.51
210409_at	MLLT4-AS1	0.54	4.09	1.48
230821_at	ZNF148	0.54	4.1	1.48
242894_at	242894_at	0.54	4.1	1.48
1564746_at	SLC9B2	0.54	4.04	1.44
229491_at	SLC9B2	0.54	4.04	1.44
227162_at	ZBTB26	0.54	4.01	1.43
215232_at	ARHGAP44	0.54	4.01	1.42
235598_at	SMAD2	0.54	3.98	1.41
219683_at	FZD3	0.54	3.97	1.4
219926_at	POPDC3	0.54	3.97	1.4
202986_at	ARNT2	0.54	3.96	1.39
238488_at	238488_at	0.54	3.94	1.38
226384_at	PPAPDC1B	0.54	3.92	1.36
214094_at	FUBP1	0.54	3.91	1.35
200986_at	SERPING1	0.54	3.85	1.32
236164_at	FLJ10038	0.54	3.84	1.31
205893_at	NLGN1	0.54	3.83	1.3
242751_at	242751_at	0.54	3.82	1.3
1562848_at	IST1	0.55	4.35	1.66
237918_at	237918_at	0.55	4.33	1.64
210070_s_at	210070_s_at	0.55	4.31	1.63
218309_at	CAMK2N1	0.55	4.27	1.6
231950_at	231950_at	0.55	4.28	1.6
210469_at	DLG5	0.55	4.26	1.59
226677_at	ZNF521	0.55	4.21	1.56
229695_at	229695_at	0.55	4.19	1.55
201825_s_at	SCCPDH	0.55	4.17	1.53
239761_at	GCNT1	0.55	4.17	1.53
230185_at	THAP9	0.55	4.15	1.52
223472_at	WHSC1	0.55	4.12	1.5
222307_at	LOC282997	0.55	4.1	1.48
217122_s_at	217122_s_at	0.55	4.08	1.47
232531_at	EMX2OS	0.55	4.06	1.46
232256_s_at	LOC401321	0.55	4	1.42
240445_at	240445_at	0.55	3.98	1.41
52837_at	KIAA1644	0.55	3.96	1.39
212462_at	KAT6B	0.55	3.95	1.38
235415_at	RPRD2	0.55	3.93	1.37
229770_at	GLT1D1	0.55	3.9	1.35
235224_s_at	CAND1	0.55	3.86	1.32
207822_at	FGFR1	0.55	3.84	1.31
230380_at	THAP2	0.56	4.23	1.57
222819_at	CTPS2	0.56	4.18	1.54
226113_at	ZNF436	0.56	4.18	1.54
217729_s_at	AES	0.56	4.17	1.53
203695_s_at	DFNA5	0.56	4.12	1.5
203902_at	HEPH	0.56	4.1	1.49
211955_at	IPO5	0.56	4.11	1.49
1553099_at	TIGD1	0.56	4.09	1.48
229374_at	EPHA4	0.56	4.09	1.48
1558755_x_at	ZNF763	0.56	4.08	1.47
209403_at	209403_at	0.56	4.08	1.47
244389_at	TLK1	0.56	4.08	1.47
239937_at	ZNF207	0.56	4.05	1.45
201431_s_at	DPYSL3	0.56	4.03	1.44
212468_at	SPAG9	0.56	4.03	1.44
217865_at	RNF130	0.56	4.03	1.44
210880_s_at	EFS	0.56	4	1.42
212677_s_at	CEP68	0.56	3.99	1.41
229116_at	CNKSR2	0.56	3.99	1.41
238081_at	WDFY3-AS2	0.56	3.97	1.4
241853_at	241853_at	0.56	3.98	1.4
209119_x_at	NR2F2	0.56	3.91	1.36
235647_at	AP4S1	0.56	3.92	1.36
209925_at	OCLN	0.56	3.9	1.35
204072_s_at	FRY	0.56	3.87	1.33
225339_at	SPAG9	0.56	3.86	1.33
236428_at	236428_at	0.56	3.86	1.32
229133_s_at	ZNF397	0.56	3.83	1.3
204759_at	RCBTB2	0.57	4.15	1.52
226114_at	ZNF436	0.57	4.13	1.51
211391_s_at	PATZ1	0.57	4.1	1.49
202136_at	ZMYND11	0.57	4.1	1.48
210379_s_at	TLK1	0.57	4.1	1.48
231954_at	DKFZP434I0714	0.57	4.07	1.47
232395_x_at	AGBL3	0.57	4.07	1.46
204161_s_at	ENPP4	0.57	4.05	1.45
241376_at	241376_at	0.57	4.03	1.44
225706_at	GLCCI1	0.57	3.98	1.41
242277_at	242277_at	0.57	3.97	1.4
227837_at	227837_at	0.57	3.96	1.39
235278_at	MACROD2	0.57	3.94	1.37
226563_at	SMAD2	0.57	3.92	1.36
228349_at	KIAA1958	0.57	3.9	1.35
240224_at	240224_at	0.57	3.88	1.34
1568983_a_at	1568983_a_at	0.57	3.84	1.31
210630_s_at	RAD52	0.57	3.85	1.31
215270_at	LFNG	0.57	3.85	1.31
220321_s_at	CCDC121	0.57	3.83	1.31
226719_at	DERL2	0.57	3.85	1.31
230301_at	230301_at	0.57	3.84	1.31
236165_at	MSL3	0.57	3.85	1.31
228584_at	SGCB	0.57	3.82	1.3
236124_at	LOC153546	0.58	4.05	1.45
215307_at	ZNF529	0.58	4	1.42
239872_at	239872_at	0.58	4	1.42
232052_at	SETD5-AS1	0.58	3.99	1.41
235634_at	PURG	0.58	3.98	1.41
238114_at	PCMTD1	0.58	3.98	1.41
209682_at	CBLB	0.58	3.97	1.4
239682_at	239682_at	0.58	3.97	1.4
1554108_at	1554108_at	0.58	3.91	1.36
210563_x_at	CFLAR	0.58	3.92	1.36
230395_at	230395_at	0.58	3.92	1.36
230477_at	PARD6G-AS1	0.58	3.92	1.36
220495_s_at	TXNDC15	0.58	3.87	1.33
226908_at	LRIG3	0.58	3.85	1.32
227618_at	227618_at	0.58	3.86	1.32
230687_at	SLC13A3	0.58	3.84	1.31
238069_at	238069_at	0.58	3.83	1.31
243707_at	243707_at	0.58	3.84	1.31
226037_s_at	TAF9B	0.59	3.98	1.4
210609_s_at	TP53I3	0.59	3.95	1.38
215947_s_at	215947_s_at	0.59	3.93	1.37
226392_at	RASA2	0.59	3.92	1.37
215894_at	PTGDR	0.59	3.92	1.36
226676_at	ZNF521	0.59	3.92	1.36
1554479_a_at	CARD8	0.59	3.89	1.34
1554743_x_at	PMS1	0.59	3.89	1.34
204088_at	P2RX4	0.59	3.86	1.32
226408_at	TEAD2	0.59	3.86	1.32
209847_at	CDH17	0.59	3.85	1.31
226764_at	ZNF827	0.59	3.84	1.31
227081_at	DNALI1	0.6	3.85	1.31
206237_s_at	NRG1	0.6	3.82	1.3
201842_s_at	EFEMP1	1.67	3.85	1.31
202854_at	HPRT1	1.68	3.89	1.34
37226_at	BNIP1	1.68	3.84	1.31
212209_at	MED13L	1.68	3.83	1.3
212411_at	IMP4	1.68	3.83	1.3
235099_at	CMTM8	1.69	3.91	1.36
208905_at	CYCS	1.69	3.89	1.34
205352_at	SERPINI1	1.69	3.87	1.33
212992_at	AHNAK2	1.69	3.87	1.33
1556344_at	LOC150051	1.69	3.86	1.32
228073_at	NANP	1.69	3.82	1.3
202446_s_at	PLSCR1	1.7	3.94	1.37
208972_s_at	ATP5G1	1.7	3.88	1.34
203344_s_at	RBBP8	1.71	3.95	1.39
201123_s_at	EIF5A	1.71	3.91	1.36
242917_at	RASGEF1A	1.71	3.91	1.36
213523_at	CCNE1	1.71	3.89	1.34
208663_s_at	208663_s_at	1.71	3.87	1.33
228150_at	SEC16B	1.71	3.86	1.33
225510_at	OAF	1.71	3.82	1.3
1569886_a_at	GLB1L3	1.72	4.03	1.44
230903_s_at	C8orf42	1.72	4.03	1.44
242328_at	RAB3C	1.72	4.01	1.43
1566603_s_at	RPUSD3	1.72	4	1.42
206149_at	CHP2	1.72	3.94	1.37
223551_at	PKIB	1.72	3.93	1.37
1554980_a_at	ATF3	1.72	3.92	1.36
213134_x_at	BTG3	1.72	3.89	1.34
229641_at	CCBE1	1.72	3.85	1.32
222376_at	222376_at	1.72	3.85	1.31
226338_at	TMEM55A	1.72	3.85	1.31
205047_s_at	ASNS	1.72	3.83	1.3
214011_s_at	NOP16	1.72	3.83	1.3
210587_at	INHBE	1.73	4.02	1.43
225003_at	TMEM205	1.73	4.02	1.43
202133_at	WWTR1	1.73	3.99	1.41
219450_at	C4orf19	1.73	3.99	1.41
230278_at	230278_at	1.73	3.94	1.37
205641_s_at	TRADD	1.73	3.92	1.36
226694_at	226694_at	1.73	3.91	1.35
205399_at	DCLK1	1.73	3.87	1.33
220225_at	IRX4	1.73	3.87	1.33
228565_at	KIAA1804	1.73	3.84	1.31
208693_s_at	GARS	1.74	4.06	1.46
231698_at	231698_at	1.74	4.04	1.45
222115_x_at	GLYR1	1.74	3.98	1.4
215195_at	PRKCA	1.74	3.96	1.39
219263_at	RNF128	1.74	3.94	1.37
220679_s_at	CDH7	1.74	3.9	1.35
220786_s_at	SLC38A4	1.74	3.9	1.35
226773_at	PPM1K	1.74	3.9	1.35
239210_at	239210_at	1.74	3.9	1.35
1554539_a_at	RHOF	1.74	3.83	1.3
213982_s_at	RABGAP1L	1.75	4.06	1.46
219032_x_at	OPN3	1.75	4.06	1.46
232327_at	THSD7B	1.75	4.06	1.46
238462_at	UBASH3B	1.75	4.04	1.45
205958_x_at	CSHL1	1.75	3.95	1.39
211709_s_at	CLEC11A	1.75	3.96	1.39
204286_s_at	PMAIP1	1.75	3.95	1.38
209312_x_at	209312_x_at	1.75	3.88	1.34
222489_s_at	WRNIP1	1.75	3.89	1.34
238417_at	PGM2L1	1.75	3.82	1.3
221881_s_at	CLIC4	1.76	4.13	1.5
223296_at	SLC25A33	1.76	4.07	1.46
205190_at	PLS1	1.76	4.01	1.43
205666_at	FMO1	1.76	3.97	1.4
214321_at	NOV	1.76	3.98	1.4
206401_s_at	MAPT	1.76	3.96	1.39
214844_s_at	DOK5	1.76	3.92	1.36
242387_at	C8orf42	1.76	3.91	1.35
206373_at	ZIC1	1.76	3.84	1.31
201152_s_at	MBNL1	1.77	4.19	1.55
214586_at	GPR37	1.77	4.16	1.53
200696_s_at	GSN	1.77	4.13	1.51
223518_at	DFFA	1.77	4.14	1.51
201980_s_at	RSU1	1.77	4.11	1.49
228568_at	228568_at	1.77	4.11	1.49
225665_at	ZAK	1.77	4.09	1.48
238440_at	CLYBL	1.77	4.08	1.47
235737_at	TSLP	1.77	4.05	1.45
201695_s_at	PNP	1.77	4.03	1.44
230025_at	GJD3	1.77	3.98	1.41
1554807_a_at	SPIRE1	1.77	3.91	1.36
227034_at	SOWAHC	1.77	3.91	1.36
1569372_at	LOC100507194	1.77	3.85	1.31
217973_at	DCXR	1.78	4.18	1.54
235275_at	BMP8B	1.78	4.15	1.52
212785_s_at	LARP7	1.78	4.09	1.48
238858_at	TIFA	1.78	4.08	1.47
225626_at	PAG1	1.78	4.05	1.45
213256_at	MARCH3	1.78	4.03	1.44
202887_s_at	DDIT4	1.78	4	1.42
225399_at	TSEN15	1.78	3.97	1.4
201490_s_at	PPIF	1.78	3.9	1.35
240152_at	240152_at	1.78	3.88	1.34
224999_at	EGFR	1.78	3.86	1.32
212816_s_at	CBS	1.78	3.84	1.31
223402_at	DUSP23	1.79	4.21	1.56
1554168_a_at	SH3KBP1	1.79	4.2	1.55
236115_at	HTR7P1	1.79	4.16	1.53
204320_at	COL11A1	1.79	4.16	1.52
217996_at	PHLDA1	1.79	4.15	1.52
212333_at	FAM98A	1.79	4.12	1.5
220319_s_at	MYLIP	1.79	4.06	1.46
208967_s_at	AK2	1.79	4.04	1.44
226795_at	LRCH1	1.79	4	1.42
235012_at	LRCH1	1.79	4.01	1.42
236377_at	TMEM132D	1.79	4.01	1.42
244840_x_at	DOCK4	1.79	3.82	1.3
209598_at	PNMA2	1.8	4.23	1.57
1558511_s_at	ESYT2	1.8	4.2	1.55
227763_at	LYPD6	1.8	4.16	1.53
230518_at	MPZL2	1.8	4.16	1.53
232027_at	SYNE1	1.8	4.17	1.53
209619_at	CD74	1.8	4.15	1.52
227139_s_at	HPS3	1.8	4.07	1.46
209083_at	CORO1A	1.8	3.97	1.4
200968_s_at	PPIB	1.8	3.93	1.37
208891_at	DUSP6	1.8	3.85	1.31
202005_at	ST14	1.81	4.29	1.61
225252_at	SRXN1	1.81	4.27	1.6
202422_s_at	ACSL4	1.81	4.26	1.59
227678_at	XRCC6BP1	1.81	4.24	1.57
224650_at	MAL2	1.81	4.21	1.56
240119_at	TEPP	1.81	4.21	1.56
209304_x_at	GADD45B	1.81	4.19	1.54
223082_at	SH3KBP1	1.81	4.17	1.53
226658_at	PDPN	1.81	4.15	1.52
208894_at	HLA-DRA	1.81	4.14	1.51
205825_at	PCSK1	1.81	4.12	1.5
207850_at	CXCL3	1.81	4.05	1.45
37547_at	BBS9	1.81	4.05	1.45
219045_at	RHOF	1.81	4.02	1.43
209708_at	MOXD1	1.81	3.82	1.3
223312_at	PRADC1	1.82	4.33	1.64
1567013_at	NFE2L2	1.82	4.29	1.61
219496_at	SOWAHC	1.82	4.27	1.6
237159_x_at	AP1S3	1.82	4.26	1.59
226271_at	GDAP1	1.82	4.24	1.58
223438_s_at	PPARA	1.82	4.23	1.57
204952_at	LYPD3	1.82	4.17	1.53
219454_at	EGFL6	1.82	4.16	1.53
219992_at	TAC3	1.82	4.16	1.53
201105_at	LGALS1	1.82	4.11	1.49
215707_s_at	PRNP	1.82	4.05	1.45
204364_s_at	REEP1	1.82	3.91	1.36
205376_at	INPP4B	1.82	3.9	1.35
227984_at	LMF1	1.82	3.9	1.35
207574_s_at	GADD45B	1.83	4.33	1.64
225283_at	ARRDC4	1.83	4.32	1.64
218024_at	MPC1	1.83	4.27	1.6
205203_at	PLD1	1.83	4.23	1.57
205548_s_at	BTG3	1.83	4.22	1.57
218450_at	HEBP1	1.83	4.17	1.53
225655_at	UHRF1	1.83	4.16	1.53
227534_at	AAED1	1.83	4.16	1.53
228575_at	IL20RB	1.83	4.03	1.44
209496_at	RARRES2	1.83	4	1.42
200967_at	PPIB	1.83	3.95	1.38
204304_s_at	PROM1	1.83	3.94	1.38
202790_at	CLDN7	1.83	3.93	1.37
218353_at	RGS5	1.83	3.88	1.33
211028_s_at	KHK	1.83	3.84	1.31
213712_at	ELOVL2	1.83	3.84	1.31
225241_at	CCDC80	1.83	3.82	1.3
209567_at	RRS1	1.84	4.37	1.67
1553500_at	FBXL21	1.84	4.34	1.65
222020_s_at	222020_s_at	1.84	4.22	1.56
227174_at	WDR72	1.84	4.21	1.56
212501_at	CEBPB	1.84	4.19	1.55
230563_at	RASGEF1A	1.84	4.1	1.49
228062_at	NAP1L5	1.84	4.06	1.46
209212_s_at	KLF5	1.84	4.02	1.43
236048_at	LHFPL1	1.84	3.97	1.4
203231_s_at	ATXN1	1.84	3.92	1.36
203232_s_at	ATXN1	1.84	3.87	1.33
225955_at	METRNL	1.84	3.86	1.32
202862_at	FAH	1.84	3.84	1.31
226855_at	PDP2	1.85	4.38	1.67
219390_at	FKBP14	1.85	4.34	1.65
222874_s_at	CLN8	1.85	4.35	1.65
216944_s_at	ITPR1	1.85	4.33	1.64
1552695_a_at	SLC2A13	1.85	4.25	1.59
201599_at	OAT	1.85	4.22	1.57
202759_s_at	202759_s_at	1.85	4.23	1.57
235599_at	LOC339535	1.85	4.23	1.57
202096_s_at	TSPO	1.85	4.13	1.51
236632_at	HHIP-AS1	1.85	4.14	1.51
205116_at	LAMA2	1.85	4.04	1.44
1570253_a_at	RHEBL1	1.85	3.98	1.41
222043_at	CLU	1.85	3.98	1.41
235171_at	LOC100505501	1.85	3.89	1.34
225308_s_at	TANC1	1.85	3.87	1.33
201984_s_at	EGFR	1.85	3.86	1.32
200824_at	GSTP1	1.86	4.41	1.69
211276_at	TCEAL2	1.86	4.39	1.68
223427_s_at	EPB41L4B	1.86	4.39	1.68
238865_at	PABPC4L	1.86	4.39	1.68
201146_at	NFE2L2	1.86	4.37	1.66
231381_at	ESRG	1.86	4.35	1.66
221011_s_at	LBH	1.86	4.33	1.64
237206_at	MYOCD	1.86	4.3	1.62
204215_at	TMEM243	1.86	4.28	1.61
203964_at	NMI	1.86	4.23	1.57
212922_s_at	SMYD2	1.86	4.24	1.57
242911_at	MED13L	1.86	4.05	1.45
203650_at	PROCR	1.86	4.03	1.44
213533_at	NSG1	1.86	3.98	1.41
222662_at	PPP1R3B	1.86	3.99	1.41
225664_at	COL12A1	1.86	3.94	1.38
226755_at	MIR205HG	1.87	4.45	1.72
209651_at	TGFB1I1	1.87	4.34	1.64
211423_s_at	SC5DL	1.87	4.32	1.64
1557014_a_at	FAM201A	1.87	4.31	1.62
239781_at	LINC00545	1.87	4.09	1.48
214787_at	DENND4A	1.87	4.05	1.45
219959_at	MOCOS	1.87	4.05	1.45
209846_s_at	BTN3A2	1.87	4.01	1.43
201465_s_at	JUN	1.87	4	1.42
201739_at	SGK1	1.87	4	1.42
1561242_at	1561242_at	1.87	3.95	1.38
235061_at	PPM1K	1.87	3.94	1.38
1560019_at	DLGAP1-AS2	1.87	3.86	1.32
227785_at	SDCCAG8	1.88	4.47	1.73
206137_at	RIMS2	1.88	4.45	1.72
202085_at	TJP2	1.88	4.44	1.71
204224_s_at	GCH1	1.88	4.43	1.71
205478_at	PPP1R1A	1.88	4.43	1.71
236488_s_at	236488_s_at	1.88	4.43	1.71
218976_at	DNAJC12	1.88	4.27	1.6
203665_at	HMOX1	1.88	4.13	1.51
204467_s_at	SNCA	1.88	4.13	1.51
214449_s_at	RHOQ	1.88	4.13	1.51
219257_s_at	SPHK1	1.88	4.07	1.46
203780_at	MPZL2	1.88	4.02	1.43
244579_at	244579_at	1.88	3.93	1.37
219121_s_at	ESRP1	1.88	3.91	1.36
238815_at	LRRTM1	1.88	3.89	1.35
218692_at	SYBU	1.89	4.52	1.77
223654_s_at	CELF4	1.89	4.36	1.66
212120_at	RHOQ	1.89	4.33	1.64
225615_at	IFFO2	1.89	4.32	1.63
226269_at	GDAP1	1.89	4.28	1.61
231018_at	PALM3	1.89	4.19	1.55
202599_s_at	NRIP1	1.89	4.18	1.54
225567_at	LOC100505573	1.89	4.18	1.54
225301_s_at	MYO5B	1.89	4.17	1.53
37892_at	COL11A1	1.89	4.14	1.52
203394_s_at	HES1	1.89	4.01	1.42
215241_at	ANO3	1.89	3.84	1.31
220448_at	KCNK12	1.89	3.84	1.31
214614_at	MNX1	1.9	4.5	1.76
203023_at	NOP16	1.9	4.48	1.74
201577_at	NME1	1.9	4.45	1.72
201847_at	LIPA	1.9	4.37	1.66
210602_s_at	CDH6	1.9	4.37	1.66
235092_at	235092_at	1.9	4.35	1.66
203813_s_at	SLIT3	1.9	4.34	1.65
1553997_a_at	ASPHD1	1.9	4.32	1.63
239835_at	KBTBD8	1.9	4.26	1.59
219668_at	GDAP1L1	1.9	4.24	1.57
209700_x_at	PDE4DIP	1.9	4.14	1.51
202760_s_at	202760_s_at	1.9	4.06	1.46
223599_at	TRIM6	1.91	4.56	1.8
224928_at	SETD7	1.91	4.53	1.78
210015_s_at	MAP2	1.91	4.41	1.69
202712_s_at	202712_s_at	1.91	4.39	1.68
228674_s_at	EML4	1.91	4.38	1.67
229147_at	RASSF6	1.91	4.2	1.55
209984_at	KDM4C	1.91	4.17	1.53
212414_s_at	212414_s_at	1.91	4.16	1.53
227566_at	227566_at	1.91	4.12	1.5
1553972_a_at	CBS	1.91	4.1	1.49
205066_s_at	ENPP1	1.91	4	1.42
221840_at	PTPRE	1.91	3.96	1.39
213188_s_at	MINA	1.92	4.59	1.81
239108_at	FAR2	1.92	4.58	1.81
232191_at	ERVH48-1	1.92	4.57	1.8
201231_s_at	ENO1	1.92	4.52	1.77
200621_at	CSRP1	1.92	4.48	1.74
213546_at	DKFZP586I1420	1.92	4.48	1.74
213497_at	ABTB2	1.92	4.46	1.72
235723_at	BNC2	1.92	4.42	1.7
222646_s_at	ERO1L	1.92	4.37	1.66
235276_at	EPSTI1	1.92	4.35	1.66
205858_at	NGFR	1.92	4.31	1.62
223710_at	CCL26	1.92	4.03	1.44
204584_at	L1CAM	1.92	3.95	1.38
221701_s_at	STRA6	1.93	4.56	1.8
225325_at	MFSD6	1.93	4.53	1.78
227702_at	CYP4X1	1.93	4.53	1.78
216594_x_at	AKR1C1	1.93	4.48	1.74
212119_at	RHOQ	1.93	4.47	1.73
212295_s_at	SLC7A1	1.93	4.38	1.67
224392_s_at	OPN3	1.93	4.22	1.56
207267_s_at	DSCR6	1.93	4.19	1.54
215343_at	CCDC88C	1.93	3.92	1.36
231042_s_at	231042_s_at	1.94	4.58	1.81
214595_at	KCNG1	1.94	4.53	1.78
236610_at	236610_at	1.94	4.53	1.78
214913_at	ADAMTS3	1.94	4.52	1.77
210601_at	CDH6	1.94	4.46	1.73
228158_at	228158_at	1.94	4.46	1.72
231991_at	CCM2L	1.94	4.25	1.58
204415_at	IFI6	1.94	4.23	1.57
201939_at	PLK2	1.94	4.09	1.48
213260_at	FOXC1	1.94	4.06	1.46
1556213_a_at	BTG3	1.94	4.02	1.43
208791_at	CLU	1.94	3.98	1.4
209569_x_at	NSG1	1.95	4.65	1.86
204319_s_at	RGS10	1.95	4.63	1.85
206669_at	GAD1	1.95	4.62	1.84
204613_at	PLCG2	1.95	4.58	1.81
206023_at	NMU	1.95	4.54	1.78
206228_at	PAX2	1.95	4.54	1.78
214531_s_at	SNX1	1.95	4.54	1.78
1556499_s_at	COL1A1	1.95	4.53	1.77
209140_x_at	HLA-B	1.95	4.44	1.71
219352_at	HERC6	1.95	4.07	1.46
206090_s_at	206090_s_at	1.95	4.03	1.44
210432_s_at	SCN3A	1.95	3.87	1.33
1563015_at	1563015_at	1.96	4.6	1.83
200738_s_at	PGK1	1.96	4.56	1.8
202575_at	CRABP2	1.96	4.41	1.69
226132_s_at	MANEAL	1.96	4.28	1.61
213925_at	C1orf95	1.96	4.22	1.57
203186_s_at	S100A4	1.96	4.04	1.44
1553321_a_at	SULT1C4	1.96	3.84	1.31
236741_at	WDR72	1.96	3.83	1.3
222033_s_at	FLT1	1.97	4.64	1.85
31845_at	ELF4	1.97	4.58	1.81
209291_at	ID4	1.97	4.48	1.74
214298_x_at	2006-09-01	1.97	4.47	1.74
221814_at	GPR124	1.97	4.01	1.42
227999_at	PWWP2B	1.98	4.71	1.9
218368_s_at	TNFRSF12A	1.98	4.69	1.89
200782_at	ANXA5	1.98	4.68	1.88
201464_x_at	JUN	1.98	4.58	1.81
214130_s_at	214130_s_at	1.98	4.52	1.77
209159_s_at	NDRG4	1.98	4.38	1.67
238066_at	RBP7	1.98	4.38	1.67
213429_at	BICC1	1.98	4.15	1.52
219230_at	TMEM100	1.98	3.98	1.41
200650_s_at	LDHA	1.99	4.72	1.91
229168_at	COL23A1	1.99	4.71	1.9
217986_s_at	BAZ1A	1.99	4.7	1.89
203595_s_at	IFIT5	1.99	4.63	1.85
201968_s_at	PGM1	1.99	4.54	1.78
201028_s_at	CD99	1.99	4.46	1.72
204554_at	PPP1R3D	1.99	4.4	1.68
229818_at	SVOP	1.99	4.38	1.67
238205_at	DCAF12L1	1.99	4.04	1.44
209506_s_at	NR2F1	1.99	3.97	1.4
206481_s_at	LDB2	2	4.76	1.94
218872_at	TESC	2	4.73	1.91
238430_x_at	SLFN5	2	4.7	1.9
229024_at	229024_at	2	4.7	1.89
218826_at	SLC35F2	2	4.65	1.86
231842_at	KIAA1462	2	4.61	1.83
201954_at	ARPC1B	2	4.45	1.72
230184_at	LOC100506421	2	4.28	1.61
201951_at	ALCAM	2	4.19	1.55
231015_at	KLF15	2	4.18	1.54
225942_at	NLN	2	3.94	1.38
219654_at	PTPLA	2.01	4.73	1.91
229376_at	PROX1	2.01	4.72	1.91
205348_s_at	DYNC1I1	2.01	4.61	1.83
238663_x_at	GRIA4	2.01	4.6	1.82
1569872_a_at	LMF1	2.01	4.54	1.78
240402_at	KIRREL3	2.01	4.5	1.75
207194_s_at	ICAM4	2.01	4.43	1.71
235205_at	OXR1	2.01	4.35	1.65
207172_s_at	CDH11	2.01	4.31	1.63
229332_at	HPDL	2.01	4.29	1.61
212923_s_at	PXDC1	2.01	4.19	1.55
223398_at	C9orf89	2.02	4.75	1.93
33322_i_at	SFN	2.02	4.67	1.87
204151_x_at	AKR1C1	2.02	4.64	1.85
221447_s_at	GLT8D2	2.02	4.62	1.84
236834_at	SCFD2	2.02	4.37	1.66
229074_at	EHD4	2.02	4.3	1.62
203892_at	WFDC2	2.02	4.01	1.42
209466_x_at	PTN	2.03	4.84	1.99
209465_x_at	PTN	2.03	4.83	1.98
230973_at	SH2D5	2.03	4.76	1.94
1555731_a_at	AP1S3	2.03	4.69	1.89
224909_s_at	PREX1	2.03	4.68	1.88
208540_x_at	208540_x_at	2.03	4.63	1.85
230560_at	STXBP6	2.03	4.6	1.83
228728_at	CPED1	2.03	4.43	1.71
211241_at	ANXA2P3	2.03	4.4	1.68
230807_at	CCDC151	2.04	4.87	2.01
201136_at	PLP2	2.04	4.48	1.74
223278_at	GJB2	2.04	4.45	1.72
205618_at	PRRG1	2.04	4.34	1.65
210187_at	FKBP1A	2.04	4.29	1.62
231841_s_at	KIAA1462	2.04	4.24	1.57
217985_s_at	BAZ1A	2.04	4.18	1.54
201952_at	ALCAM	2.04	4.15	1.52
228547_at	NRXN1	2.04	3.9	1.35
206683_at	ZNF165	2.05	4.75	1.93
209958_s_at	BBS9	2.05	4.64	1.85
228007_at	CEP85L	2.05	4.61	1.84
207265_s_at	KDELR3	2.05	4.57	1.8
211766_s_at	PNLIPRP2	2.05	4.3	1.62
225846_at	ESRP1	2.05	4.3	1.62
206200_s_at	ANXA11	2.05	4.2	1.55
204285_s_at	PMAIP1	2.05	4.17	1.53
203339_at	SLC25A12	2.05	4.13	1.51
204879_at	PDPN	2.05	4.05	1.45
219167_at	RASL12	2.05	4.02	1.43
219277_s_at	OGDHL	2.05	3.91	1.36
204284_at	PPP1R3C	2.06	4.82	1.98
242463_x_at	ZNF600	2.06	4.82	1.98
204017_at	KDELR3	2.06	4.79	1.96
216967_at	GAP43	2.06	4.76	1.94
208690_s_at	PDLIM1	2.06	4.68	1.88
214056_at	MCL1	2.06	4.52	1.77
202597_at	IRF6	2.06	4.44	1.72
240254_at	240254_at	2.06	3.84	1.31
220761_s_at	TAOK3	2.06	3.82	1.3
226811_at	FAM46C	2.07	4.92	2.05
212413_at	2006-09-01	2.07	4.79	1.96
210732_s_at	LGALS8	2.07	4.77	1.95
204697_s_at	CHGA	2.07	4.48	1.74
229327_s_at	MAF	2.07	4.4	1.68
235147_at	235147_at	2.07	4.37	1.66
206336_at	CXCL6	2.08	4.74	1.93
242522_at	TCF24	2.08	4.74	1.93
235287_at	CDK6	2.08	4.67	1.87
217437_s_at	TACC1	2.08	4.61	1.83
210762_s_at	DLC1	2.08	4.4	1.69
209570_s_at	NSG1	2.08	4.29	1.61
236179_at	CDH11	2.08	4.16	1.53
204851_s_at	DCX	2.08	4.15	1.52
204479_at	OSTF1	2.09	4.96	2.07
1561754_at	1561754_at	2.09	4.74	1.93
203827_at	WIPI1	2.09	4.32	1.64
219703_at	MNS1	2.09	4.3	1.62
213744_at	ATRNL1	2.1	4.98	2.08
227068_at	PGK1	2.1	4.98	2.08
202747_s_at	ITM2A	2.1	4.95	2.07
221268_s_at	SGPP1	2.1	4.96	2.07
201466_s_at	JUN	2.1	4.87	2.01
205328_at	CLDN10	2.1	4.85	2
208092_s_at	FAM49A	2.1	4.83	1.98
209348_s_at	MAF	2.1	4.77	1.94
223193_x_at	FAM162A	2.1	4.72	1.91
212845_at	SAMD4A	2.1	4.68	1.88
220942_x_at	FAM162A	2.1	4.63	1.84
222912_at	ARRB1	2.1	4.5	1.76
244832_at	244832_at	2.1	4.16	1.53
211737_x_at	PTN	2.11	4.91	2.04
242385_at	RORB	2.11	4.92	2.04
218251_at	MID1IP1	2.11	4.8	1.97
203159_at	GLS	2.11	4.77	1.95
215380_s_at	GGCT	2.11	4.49	1.75
203158_s_at	GLS	2.11	4.46	1.72
226870_at	COMTD1	2.11	4.45	1.72
205638_at	BAI3	2.11	4.14	1.51
211719_x_at	FN1	2.11	4.02	1.43
203131_at	PDGFRA	2.11	3.87	1.33
235117_at	CHAC2	2.12	5.01	2.11
204712_at	WIF1	2.12	5	2.1
241925_x_at	SLC16A7	2.12	4.92	2.04
202554_s_at	GSTM3	2.12	4.68	1.88
211518_s_at	BMP4	2.12	4.69	1.88
200911_s_at	TACC1	2.12	4.62	1.84
242488_at	CHRM3	2.12	4.56	1.8
212122_at	RHOQ	2.12	4.51	1.76
229651_at	SEZ6	2.12	4.14	1.51
212998_x_at	HLA-DQB1	2.12	4	1.42
210809_s_at	POSTN	2.12	3.99	1.41
204616_at	UCHL3	2.13	5.04	2.12
213664_at	SLC1A1	2.13	5.02	2.11
215501_s_at	DUSP10	2.13	4.95	2.06
204466_s_at	SNCA	2.13	4.9	2.03
214791_at	SP140L	2.13	4.82	1.98
243161_x_at	ZFP42	2.13	4.79	1.96
212730_at	SYNM	2.13	4.41	1.7
200737_at	PGK1	2.13	4.32	1.64
203083_at	THBS2	2.13	4.28	1.61
219093_at	PID1	2.13	4.2	1.55
201341_at	ENC1	2.13	4.11	1.49
226923_at	SCFD2	2.14	5.05	2.13
200916_at	TAGLN2	2.14	5.02	2.11
232166_at	KIAA1377	2.14	4.93	2.05
224345_x_at	FAM162A	2.14	4.92	2.04
210827_s_at	ELF3	2.14	4.8	1.97
223322_at	RASSF5	2.14	4.76	1.94
1555725_a_at	RGS5	2.14	4.33	1.64
218501_at	ARHGEF3	2.14	4.06	1.46
214993_at	ASPHD1	2.14	4.04	1.44
209459_s_at	ABAT	2.14	3.97	1.4
37549_g_at	BBS9	2.15	4.87	2.01
203610_s_at	TRIM38	2.15	4.3	1.62
229613_at	229613_at	2.15	4.19	1.55
205850_s_at	GABRB3	2.16	5.11	2.17
213836_s_at	WIPI1	2.16	5.11	2.17
208936_x_at	LGALS8	2.16	5.05	2.13
237439_at	USP43	2.16	5	2.1
226725_at	226725_at	2.16	4.95	2.07
201151_s_at	MBNL1	2.16	4.94	2.06
203192_at	ABCB6	2.16	4.89	2.03
213603_s_at	RAC2	2.16	4.83	1.98
220615_s_at	FAR2	2.16	4.73	1.91
224925_at	PREX1	2.16	4.66	1.86
225166_at	ARHGAP18	2.16	4.49	1.75
214597_at	SSTR2	2.17	5.05	2.13
220234_at	CA8	2.17	4.88	2.02
205899_at	CCNA1	2.17	4.71	1.9
202069_s_at	IDH3A	2.17	4.56	1.8
204547_at	RAB40B	2.17	4.5	1.75
209070_s_at	RGS5	2.17	4.41	1.69
213030_s_at	PLXNA2	2.17	4.24	1.57
202934_at	HK2	2.18	5.16	2.21
215726_s_at	CYB5A	2.18	5.14	2.19
226907_at	PPP1R14C	2.18	4.97	2.08
205891_at	ADORA2B	2.18	4.89	2.03
208933_s_at	LGALS8	2.18	4.71	1.91
201983_s_at	EGFR	2.18	4.6	1.83
236395_at	236395_at	2.18	4.57	1.8
205051_s_at	KIT	2.18	4.5	1.75
227985_at	LOC100506098	2.18	3.88	1.34
241698_at	RFTN2	2.19	5.13	2.19
1561367_a_at	LINC00540	2.19	5.06	2.13
213666_at	2006-09-01	2.19	5	2.1
229461_x_at	NEGR1	2.19	4.72	1.91
202196_s_at	DKK3	2.19	4.6	1.83
213424_at	KIAA0895	2.19	4.49	1.74
235562_at	C3orf70	2.19	4.19	1.55
214434_at	HSPA12A	2.19	4.08	1.47
230419_at	FLJ37644	2.19	3.99	1.41
231195_at	KLRG2	2.2	5.19	2.23
1554777_at	ZFP42	2.2	5.15	2.2
232760_at	TEX15	2.2	5.06	2.14
214247_s_at	DKK3	2.2	5.01	2.11
203817_at	GUCY1B3	2.2	4.92	2.04
201251_at	PKM	2.2	4.77	1.95
217356_s_at	PGK1	2.2	4.78	1.95
225944_at	NLN	2.2	4.78	1.95
231136_at	MIR30C2	2.2	4.22	1.56
209008_x_at	KRT8	2.21	5.22	2.24
204220_at	GMFG	2.21	5.1	2.16
236351_at	LOC389023	2.21	5.07	2.14
207197_at	ZIC3	2.21	4.98	2.08
1556029_s_at	NMNAT2	2.21	4.88	2.02
221935_s_at	EOGT	2.21	4.62	1.84
215594_at	ERV9-1	2.21	4.57	1.81
213125_at	OLFML2B	2.21	4.48	1.74
219825_at	CYP26B1	2.21	4.41	1.69
236915_at	C4orf47	2.21	4.38	1.67
203065_s_at	CAV1	2.21	3.85	1.32
236277_at	236277_at	2.22	5.22	2.25
213189_at	MINA	2.22	5.17	2.21
213506_at	F2RL1	2.22	5.1	2.16
206363_at	MAF	2.22	5.02	2.11
218681_s_at	SDF2L1	2.22	5.01	2.11
219134_at	ELTD1	2.22	4.92	2.04
210560_at	GBX2	2.22	4.84	1.99
220868_s_at	SLC7A10	2.22	4.72	1.91
1553299_at	DUSP5P1	2.22	4.64	1.85
222071_s_at	SLCO4C1	2.22	4.21	1.56
212311_at	SEL1L3	2.23	5.18	2.22
229484_at	PPM1J	2.23	5.08	2.15
204389_at	MAOA	2.23	5.04	2.12
217520_x_at	217520_x_at	2.23	4.95	2.07
202363_at	SPOCK1	2.23	4.44	1.72
219895_at	TMEM255A	2.23	4.28	1.61
206291_at	NTS	2.23	3.82	1.3
209366_x_at	CYB5A	2.24	5.17	2.21
204530_s_at	TOX	2.24	5.04	2.12
201037_at	PFKP	2.24	4.97	2.08
201798_s_at	MYOF	2.24	4.95	2.06
208500_x_at	FOXD3	2.24	4.86	2
1554352_s_at	DENND4A	2.24	4.61	1.83
223748_at	SLC4A11	2.24	4.57	1.8
210807_s_at	SLC16A7	2.24	4.47	1.74
231778_at	DLX3	2.24	4.36	1.66
205358_at	GRIA2	2.24	3.89	1.35
207275_s_at	ACSL1	2.25	5.12	2.18
228708_at	RAB27B	2.25	5.07	2.14
201848_s_at	BNIP3	2.25	5.03	2.12
218145_at	TRIB3	2.25	4.93	2.05
1557880_at	1557880_at	2.25	4.4	1.69
226863_at	FAM110C	2.25	4.24	1.57
204933_s_at	TNFRSF11B	2.25	3.93	1.37
214070_s_at	ATP10B	2.25	3.83	1.3
210519_s_at	NQO1	2.26	5.19	2.23
222486_s_at	ADAMTS1	2.26	5.16	2.21
210665_at	TFPI	2.26	4.83	1.98
227070_at	GLT8D2	2.26	4.74	1.92
226876_at	FAM101B	2.26	4.57	1.8
203857_s_at	PDIA5	2.26	4.33	1.64
226856_at	226856_at	2.26	4.2	1.55
229595_at	CHCHD4	2.27	5.32	2.32
219933_at	GLRX2	2.27	5.2	2.24
204394_at	SLC43A1	2.27	4.8	1.97
228441_s_at	228441_s_at	2.27	4.76	1.94
219700_at	PLXDC1	2.27	4.64	1.85
224822_at	DLC1	2.27	4.47	1.73
205027_s_at	MAP3K8	2.27	4.18	1.54
202600_s_at	NRIP1	2.27	4.07	1.46
226806_s_at	NFIA	2.27	3.96	1.39
232254_at	232254_at	2.27	3.84	1.31
215789_s_at	AJAP1	2.28	5.12	2.18
1562301_at	C8orf34	2.28	5.12	2.17
219867_at	CHODL	2.28	5.09	2.16
241807_x_at	241807_x_at	2.28	5.07	2.14
214183_s_at	TKTL1	2.28	4.83	1.98
226955_at	AFAP1L1	2.28	4.83	1.98
205081_at	CRIP1	2.28	4.63	1.84
225911_at	NPNT	2.28	4.45	1.72
209693_at	ASTN2	2.29	5.34	2.33
235311_at	FKBP14	2.29	5.22	2.25
221539_at	EIF4EBP1	2.29	5.2	2.24
212415_at	2006-09-01	2.29	5.15	2.2
242338_at	TMEM64	2.29	4.96	2.07
202733_at	P4HA2	2.29	4.87	2.01
228010_at	PPP2R2C	2.29	4.5	1.76
218332_at	BEX1	2.3	5.04	2.12
219498_s_at	BCL11A	2.3	4.98	2.08
228952_at	ENPP1	2.3	4.97	2.08
241436_at	SCNN1G	2.3	4.81	1.98
213618_at	ARAP2	2.3	4.81	1.97
225540_at	MAP2	2.3	4.75	1.93
225081_s_at	CDCA7L	2.31	5.24	2.26
202660_at	ITPR2	2.31	5.1	2.17
209839_at	DNM3	2.31	4.77	1.94
1554283_at	CCRN4L	2.31	4.56	1.8
204702_s_at	NFE2L3	2.31	4.29	1.61
214157_at	GNAS	2.32	4.48	1.74
202409_at	202409_at	2.32	4.22	1.56
201631_s_at	IER3	2.33	5.4	2.37
211654_x_at	HLA-DQB1	2.33	5.39	2.36
209960_at	HGF	2.33	5.23	2.25
207327_at	EYA4	2.33	5.14	2.19
231517_at	ZYG11A	2.33	4.78	1.95
231336_at	CPNE4	2.33	4.69	1.89
223130_s_at	MYLIP	2.33	4.65	1.86
238537_at	CA8	2.33	4.16	1.53
243974_at	243974_at	2.33	4.11	1.49
203814_s_at	NQO2	2.34	5.42	2.38
238018_at	FAM150B	2.34	5.32	2.32
209457_at	DUSP5	2.34	5.22	2.25
243000_at	CDK6	2.34	4.7	1.9
201340_s_at	ENC1	2.34	4.54	1.78
233446_at	ONECUT2	2.34	4.23	1.57
205158_at	RNASE4	2.34	3.95	1.39
215101_s_at	CXCL5	2.34	3.86	1.32
218699_at	RAB7L1	2.35	5.44	2.4
219305_x_at	FBXO2	2.35	5.37	2.35
204347_at	204347_at	2.35	5.03	2.12
206429_at	F2RL1	2.35	5.02	2.11
214022_s_at	IFITM1	2.35	4.61	1.83
230861_at	DKFZP434L187	2.35	4.21	1.56
218704_at	RNF43	2.35	4.03	1.44
218807_at	VAV3	2.36	5.01	2.11
206801_at	NPPB	2.36	4.5	1.75
52255_s_at	COL5A3	2.36	4.21	1.56
208268_at	ADAM28	2.36	4.05	1.45
221563_at	DUSP10	2.36	4.04	1.45
211203_s_at	CNTN1	2.37	5.46	2.41
207843_x_at	CYB5A	2.37	5.38	2.36
202746_at	ITM2A	2.37	5.33	2.33
209621_s_at	PDLIM3	2.37	5.34	2.33
221898_at	PDPN	2.37	5.3	2.3
226697_at	FAM114A1	2.37	5.26	2.27
230276_at	FAM49A	2.37	4.98	2.09
203710_at	ITPR1	2.37	4.85	1.99
224565_at	224565_at	2.37	4.64	1.85
225573_at	225573_at	2.38	5.49	2.43
239913_at	SLC10A4	2.38	5.41	2.38
226354_at	LACTB	2.38	5.2	2.24
205543_at	HSPA4L	2.38	5.07	2.14
212999_x_at	HLA-DQB1	2.38	5.02	2.11
210032_s_at	SPAG6	2.38	4.98	2.09
201601_x_at	201601_x_at	2.38	4.97	2.08
236734_at	SLITRK1	2.38	4.44	1.72
203567_s_at	TRIM38	2.38	3.88	1.34
202345_s_at	FABP5	2.39	5.5	2.43
235046_at	INPP4B	2.39	5.49	2.43
211555_s_at	GUCY1B3	2.39	5.33	2.33
235489_at	RHOJ	2.39	5.06	2.13
207014_at	GABRA2	2.4	5.41	2.38
225809_at	PARM1	2.4	5.37	2.35
205673_s_at	ASB9	2.4	5.26	2.27
206837_at	ALX1	2.4	5.12	2.18
229657_at	THRB	2.4	4.83	1.98
203725_at	GADD45A	2.41	5.36	2.34
230333_at	230333_at	2.41	4.93	2.05
201428_at	CLDN4	2.41	4.83	1.98
214719_at	SLC46A3	2.41	4.81	1.97
209829_at	FAM65B	2.41	4.31	1.63
235492_at	RNF217	2.41	4.2	1.55
204932_at	TNFRSF11B	2.42	5.29	2.3
202990_at	PYGL	2.42	5	2.1
203304_at	BAMBI	2.42	4.92	2.04
217553_at	STEAP1B	2.43	5.23	2.26
205112_at	PLCE1	2.43	5.05	2.13
220625_s_at	ELF5	2.43	4.83	1.98
204388_s_at	MAOA	2.43	4.48	1.74
219740_at	VASH2	2.44	5.52	2.44
226782_at	SLC25A30	2.44	5.34	2.33
204679_at	KCNK1	2.44	5.31	2.31
1552485_at	LACTB	2.44	4.85	2
205932_s_at	MSX1	2.44	4.2	1.55
220115_s_at	CDH10	2.45	5.17	2.21
227526_at	CDON	2.45	4.08	1.47
205278_at	GAD1	2.46	5.62	2.51
205542_at	STEAP1	2.46	5.6	2.5
223316_at	CCDC3	2.46	5.54	2.46
220384_at	NME8	2.46	5.31	2.31
218162_at	OLFML3	2.46	4.65	1.86
206541_at	KLKB1	2.46	4.43	1.71
243356_at	243356_at	2.46	3.97	1.4
217294_s_at	ENO1	2.47	5.49	2.43
223437_at	PPARA	2.47	5.5	2.43
204260_at	CHGB	2.47	5.39	2.36
201849_at	BNIP3	2.47	5.2	2.23
242093_at	SYTL5	2.47	5.13	2.18
215321_at	RUNDC3B	2.47	4.5	1.75
219414_at	CLSTN2	2.47	4.41	1.7
210754_s_at	LYN	2.48	5.65	2.54
219147_s_at	NMRK1	2.48	5.65	2.54
206544_x_at	SMARCA2	2.48	5.63	2.52
205350_at	CRABP1	2.48	5.57	2.48
214596_at	CHRM3	2.48	5.47	2.42
242909_at	242909_at	2.48	5.29	2.3
206018_at	FOXG1	2.48	4.85	1.99
209505_at	209505_at	2.48	4.58	1.81
230003_at	230003_at	2.48	4.18	1.54
205381_at	LRRC17	2.49	5.12	2.18
227193_at	SLC30A4	2.49	4.93	2.05
236300_at	PDE3A	2.49	4.79	1.96
205555_s_at	MSX2	2.49	4.77	1.95
203148_s_at	TRIM14	2.49	4.59	1.82
227690_at	GABRB3	2.49	4.45	1.72
229518_at	FAM46B	2.5	4.93	2.05
202528_at	GALE	2.5	4.79	1.96
202626_s_at	LYN	2.51	5.7	2.58
1555526_a_at	2006-09-01	2.51	5.64	2.53
230464_at	S1PR5	2.51	3.89	1.34
201117_s_at	CPE	2.52	5.64	2.53
226452_at	PDK1	2.52	5.48	2.42
203323_at	CAV2	2.52	5.46	2.41
235976_at	SLITRK6	2.52	4.97	2.08
229823_at	RIMS2	2.52	4.23	1.57
207109_at	POU2F3	2.53	5.56	2.47
230630_at	230630_at	2.53	4.82	1.98
1554640_at	PALM2	2.53	4.69	1.89
47550_at	LZTS1	2.53	4.66	1.86
206382_s_at	BDNF	2.54	5.67	2.55
219863_at	HERC5	2.54	5.51	2.43
227817_at	PRKCB	2.54	5.3	2.31
209842_at	SOX10	2.54	5.18	2.22
204326_x_at	MT1X	2.54	5.14	2.2
211864_s_at	MYOF	2.54	5.03	2.12
215271_at	TNN	2.54	4.78	1.95
228937_at	LACC1	2.55	5.74	2.6
202855_s_at	SLC16A3	2.55	5.59	2.49
209699_x_at	AKR1C2	2.55	5.54	2.46
201467_s_at	NQO1	2.55	5.53	2.45
233606_at	233606_at	2.55	5.49	2.43
217867_x_at	BACE2	2.55	5.18	2.22
211653_x_at	AKR1C2	2.55	4.87	2.01
235956_at	KIAA1377	2.55	4.58	1.81
202499_s_at	SLC2A3	2.55	4.34	1.65
208146_s_at	CPVL	2.56	5.75	2.61
222162_s_at	ADAMTS1	2.56	5.36	2.34
233934_at	LOC349160	2.56	4.9	2.03
202947_s_at	GYPC	2.57	5.77	2.62
224848_at	CDK6	2.57	5.02	2.11
217728_at	S100A6	2.58	5.8	2.64
202546_at	VAMP8	2.58	5.73	2.59
208078_s_at	208078_s_at	2.58	5.35	2.34
214079_at	DHRS2	2.58	5.07	2.14
213093_at	PRKCA	2.58	5.04	2.12
224847_at	CDK6	2.58	4.72	1.91
203455_s_at	SAT1	2.59	5.73	2.6
225202_at	RHOBTB3	2.59	5.52	2.44
216236_s_at	216236_s_at	2.59	5.46	2.41
222088_s_at	222088_s_at	2.59	5.41	2.38
204949_at	ICAM3	2.59	4.71	1.9
230356_at	230356_at	2.59	3.87	1.33
213933_at	PTGER3	2.6	5.69	2.56
209685_s_at	PRKCB	2.6	5.49	2.43
229228_at	229228_at	2.6	5.08	2.15
1569796_s_at	ATRNL1	2.6	4.99	2.09
228507_at	PDE3A	2.6	4.65	1.86
227084_at	DTNA	2.61	5.71	2.58
1553986_at	RASEF	2.61	5.45	2.4
233675_s_at	TPTE2P6	2.61	5.39	2.36
211148_s_at	ANGPT2	2.61	5.33	2.33
207424_at	MYF5	2.61	5.05	2.13
209892_at	FUT4	2.61	4.02	1.43
208370_s_at	RCAN1	2.62	5.85	2.67
206460_at	AJAP1	2.62	5.83	2.66
225716_at	BRI3BP	2.63	5.73	2.59
202976_s_at	RHOBTB3	2.63	5.51	2.43
210383_at	SCN1A	2.63	4.92	2.05
1554887_at	1554887_at	2.63	4.83	1.98
218723_s_at	RGCC	2.64	5.8	2.64
229300_at	RAB3C	2.64	5.56	2.47
204678_s_at	KCNK1	2.64	5.16	2.21
235247_at	235247_at	2.64	4.77	1.95
202375_at	SEC24D	2.65	5.82	2.65
234989_at	234989_at	2.65	4.53	1.78
207528_s_at	SLC7A11	2.65	4.48	1.74
242500_at	242500_at	2.65	4.15	1.52
205817_at	SIX1	2.66	5.81	2.65
213455_at	FAM114A1	2.66	5.65	2.54
201170_s_at	BHLHE40	2.66	5.49	2.43
242814_at	SERPINB9	2.66	5.43	2.39
241002_at	241002_at	2.66	5.02	2.11
201116_s_at	CPE	2.67	5.89	2.69
205184_at	GNG4	2.67	5.8	2.64
201300_s_at	PRNP	2.67	5.28	2.29
239457_at	ATP8B3	2.67	5.11	2.17
231202_at	ALDH1L2	2.67	4.94	2.06
208065_at	ST8SIA3	2.68	5.46	2.41
208934_s_at	LGALS8	2.68	5.15	2.2
209602_s_at	GATA3	2.69	5.89	2.69
220484_at	MCOLN3	2.69	5.82	2.65
225972_at	TMEM64	2.7	5.68	2.56
221605_s_at	PIPOX	2.7	5.65	2.54
202498_s_at	SLC2A3	2.7	5.11	2.17
235144_at	RASEF	2.71	5.97	2.75
214608_s_at	EYA1	2.71	5.84	2.66
217762_s_at	RAB31	2.71	5.76	2.61
219195_at	PPARGC1A	2.72	5.98	2.76
235771_at	235771_at	2.72	5.71	2.58
210664_s_at	TFPI	2.72	5.5	2.43
201468_s_at	NQO1	2.72	5.41	2.38
202497_x_at	SLC2A3	2.72	5.32	2.32
225798_at	JAZF1	2.72	4.98	2.08
229139_at	JPH1	2.72	4.77	1.95
231341_at	SLC35D3	2.72	4.36	1.66
223962_at	TTC29	2.73	5.71	2.58
229724_at	GABRB3	2.73	5.69	2.56
235343_at	VASH2	2.73	5.48	2.42
208018_s_at	HCK	2.73	5.35	2.34
224566_at	224566_at	2.73	5.05	2.13
1553153_at	ATP6V0D2	2.73	4.91	2.04
219837_s_at	CYTL1	2.73	4.87	2.01
212097_at	CAV1	2.73	4.84	1.99
223611_s_at	LNX1	2.73	4.77	1.94
239345_at	SLC19A3	2.73	4.12	1.5
1554690_a_at	TACC1	2.74	5.94	2.73
1555765_a_at	GNG4	2.74	5.93	2.72
227850_x_at	CDC42EP5	2.74	5.78	2.63
1554079_at	GALNT18	2.74	5.51	2.43
227038_at	SGMS2	2.74	5.41	2.38
226905_at	FAM101B	2.74	5.27	2.28
206670_s_at	GAD1	2.75	5.87	2.68
223423_at	GPR160	2.75	5.62	2.51
208606_s_at	WNT4	2.75	5.31	2.31
223092_at	ANKH	2.76	5.67	2.55
232226_at	LRRC4C	2.76	5.38	2.36
201422_at	IFI30	2.76	5.26	2.27
203518_at	LYST	2.76	4.34	1.65
236692_at	236692_at	2.77	5.87	2.68
201865_x_at	NR3C1	2.78	6.05	2.8
205433_at	BCHE	2.78	5.89	2.69
219196_at	SCG3	2.78	5.77	2.62
212724_at	RND3	2.79	5.82	2.65
227641_at	FBXL16	2.79	5.73	2.59
232176_at	SLITRK6	2.8	5.89	2.69
206247_at	MICB	2.8	5.72	2.59
1555867_at	GNG4	2.8	5.29	2.3
213258_at	TFPI	2.8	5.05	2.13
228750_at	228750_at	2.8	4.64	1.86
204348_s_at	204348_s_at	2.81	5.88	2.68
201195_s_at	SLC7A5	2.81	5.86	2.67
205872_x_at	PDE4DIP	2.81	5.58	2.48
204591_at	CHL1	2.81	4.73	1.91
219984_s_at	HRASLS	2.82	5.97	2.75
225974_at	TMEM64	2.82	5.86	2.67
226560_at	226560_at	2.82	5.36	2.35
212741_at	MAOA	2.82	5.15	2.2
1554655_a_at	RPRML	2.83	5.8	2.64
219885_at	SLFN12	2.83	5.74	2.6
206281_at	ADCYAP1	2.83	5.41	2.38
202800_at	SLC1A3	2.83	4.98	2.08
205619_s_at	MEOX1	2.83	4.81	1.98
213524_s_at	G0S2	2.83	4.61	1.83
205111_s_at	PLCE1	2.84	5.77	2.62
230769_at	DENND2C	2.84	5.59	2.5
214369_s_at	RASGRP2	2.84	5.29	2.3
217764_s_at	RAB31	2.85	5.94	2.73
230237_at	ADCYAP1	2.85	4.96	2.07
215729_s_at	VGLL1	2.86	4.34	1.64
233050_at	233050_at	2.87	5.69	2.57
226978_at	PPARA	2.88	6.09	2.83
202625_at	LYN	2.88	6.06	2.81
213050_at	COBL	2.88	5.49	2.43
233536_at	ASXL3	2.88	5.22	2.24
219073_s_at	OSBPL10	2.89	6.04	2.8
227764_at	LYPD6	2.89	5.99	2.76
201325_s_at	EMP1	2.89	5.45	2.41
1569476_at	DKFZP434L187	2.89	5.35	2.33
205608_s_at	ANGPT1	2.89	4.67	1.87
227182_at	SUSD3	2.9	6.14	2.87
218189_s_at	NANS	2.9	6	2.77
241435_at	241435_at	2.9	5.84	2.66
213385_at	CHN2	2.9	5.82	2.65
204596_s_at	STC1	2.9	5.1	2.16
204955_at	SRPX	2.91	6.05	2.8
212865_s_at	COL14A1	2.91	5.98	2.76
219497_s_at	BCL11A	2.91	4.91	2.04
222651_s_at	TRPS1	2.92	6.04	2.8
206189_at	UNC5C	2.92	5.77	2.62
205738_s_at	FABP3	2.92	5.21	2.24
205668_at	LY75	2.94	4.94	2.06
235652_at	235652_at	2.94	4.32	1.63
209071_s_at	RGS5	2.95	6.19	2.89
208816_x_at	ANXA2P2	2.95	5.86	2.67
241772_at	241772_at	2.95	4.91	2.04
218995_s_at	EDN1	2.95	4.65	1.86
212538_at	DOCK9	2.96	5.23	2.25
1556194_a_at	1556194_a_at	2.96	5.19	2.22
235174_s_at	LOC100128822	2.97	5.78	2.63
242447_at	C3orf70	2.97	4.46	1.73
220736_at	SLC19A3	2.98	5.02	2.11
227830_at	GABRB3	2.99	5.97	2.75
202672_s_at	ATF3	2.99	5.91	2.71
225342_at	225342_at	2.99	5.72	2.59
206309_at	LECT1	2.99	5.6	2.5
219983_at	HRASLS	2.99	5.52	2.44
227410_at	FAM43A	2.99	4.46	1.72
227609_at	EPSTI1	3	6.27	2.94
227099_s_at	C11orf96	3	5.83	2.65
207981_s_at	ESRRG	3	5.37	2.35
203542_s_at	KLF9	3.01	6.28	2.95
207057_at	SLC16A7	3.01	6.27	2.94
203066_at	CHST15	3.01	5.02	2.11
208949_s_at	LGALS3	3.02	6.07	2.81
203423_at	RBP1	3.03	6.32	2.97
202975_s_at	RHOBTB3	3.03	6.27	2.94
205538_at	CORO2A	3.03	5.75	2.61
224851_at	CDK6	3.03	5	2.09
213375_s_at	N4BP2L1	3.04	6.27	2.94
230262_at	ST8SIA3	3.04	6.22	2.91
211597_s_at	HOPX	3.04	5.76	2.62
1557369_a_at	LINC00698	3.04	5.16	2.2
219106_s_at	KLHL41	3.05	6.31	2.97
207729_at	CDH9	3.05	4.65	1.86
205234_at	SLC16A4	3.06	6.35	2.99
210592_s_at	SAT1	3.06	6.19	2.89
1552486_s_at	LACTB	3.06	5.58	2.49
228598_at	DPP10	3.07	6.36	2.99
237275_at	LINC00458	3.07	6.17	2.88
214636_at	CALCB	3.07	5.85	2.67
207957_s_at	PRKCB	3.07	5.42	2.38
1561331_at	ERVMER61-1	3.08	6.35	2.99
206029_at	ANKRD1	3.08	5.58	2.49
218502_s_at	TRPS1	3.08	5.57	2.48
202936_s_at	SOX9	3.08	5.22	2.25
205141_at	ANG	3.1	6.3	2.96
213456_at	SOSTDC1	3.11	6.39	3.01
209683_at	FAM49A	3.12	6.15	2.87
227703_s_at	SYTL4	3.12	5.23	2.25
219388_at	GRHL2	3.13	6.26	2.94
226186_at	TMOD2	3.14	4.21	1.56
202620_s_at	PLOD2	3.15	5.79	2.63
232481_s_at	SLITRK6	3.15	5.76	2.61
217109_at	MUC4	3.15	5.6	2.5
231798_at	NOG	3.16	5.17	2.21
203001_s_at	STMN2	3.17	6.42	3.03
224975_at	NFIA	3.17	6.18	2.89
238063_at	TMEM154	3.19	5.91	2.71
229292_at	EPB41L5	3.2	5.95	2.74
212099_at	RHOB	3.21	5.79	2.64
231192_at	LPAR3	3.21	4.44	1.72
219569_s_at	SLC35G2	3.22	6.41	3.02
201596_x_at	KRT18	3.22	6.24	2.92
239533_at	GPR155	3.22	5.03	2.12
221019_s_at	COLEC12	3.22	4.99	2.09
242532_at	242532_at	3.22	4.2	1.55
217763_s_at	RAB31	3.23	5.47	2.42
211671_s_at	NR3C1	3.23	5.43	2.39
208358_s_at	UGT8	3.24	5.48	2.42
221773_at	ELK3	3.24	4.82	1.98
225173_at	ARHGAP18	3.25	6.16	2.87
235736_at	SMKR1	3.25	5.23	2.25
203000_at	STMN2	3.26	6.47	3.07
240112_at	240112_at	3.26	4.83	1.98
213802_at	PRSS12	3.27	6.22	2.92
1552736_a_at	NETO1	3.27	6.04	2.8
206552_s_at	TAC1	3.27	6	2.77
202719_s_at	TES	3.28	6.47	3.06
201427_s_at	SEPP1	3.28	6.36	2.99
219737_s_at	PCDH9	3.28	5.85	2.67
213479_at	NPTX2	3.29	6.18	2.89
209676_at	TFPI	3.29	5.7	2.57
221729_at	COL5A2	3.3	6.56	3.11
206542_s_at	SMARCA2	3.31	6.19	2.9
241703_at	RUNDC3B	3.31	6.08	2.82
226938_at	DCAF4	3.32	6.47	3.06
230372_at	HAS2	3.32	6.16	2.87
230951_at	EPB41L5	3.32	5.04	2.12
227742_at	CLIC6	3.33	6.27	2.94
223557_s_at	TMEFF2	3.33	6.22	2.92
219955_at	L1TD1	3.34	5.98	2.76
231837_at	USP28	3.34	5.81	2.65
1553485_at	CCDC140	3.36	6.28	2.94
228782_at	SCGB3A2	3.36	6.16	2.88
224218_s_at	TRPS1	3.36	5.38	2.36
226985_at	FGD5	3.37	6.58	3.13
219869_s_at	SLC39A8	3.37	6.55	3.11
213601_at	213601_at	3.37	6.05	2.8
227862_at	TRNP1	3.38	6.29	2.96
202619_s_at	PLOD2	3.4	6.53	3.1
235518_at	SLC8A1	3.41	6.05	2.8
230836_at	ST8SIA4	3.41	4.92	2.05
202720_at	TES	3.42	6.57	3.12
202856_s_at	SLC16A3	3.42	5.86	2.67
209859_at	TRIM9	3.43	5.48	2.42
1555355_a_at	ETS1	3.43	4.69	1.89
205030_at	FABP7	3.45	6.68	3.18
219789_at	NPR3	3.45	4.06	1.46
209267_s_at	SLC39A8	3.46	5.98	2.76
227062_at	227062_at	3.47	6.52	3.09
1554524_a_at	OLFM3	3.47	6.04	2.8
218700_s_at	RAB7L1	3.47	5.81	2.65
219622_at	RAB20	3.48	6.71	3.2
225239_at	225239_at	3.48	5.99	2.76
205572_at	ANGPT2	3.48	5.76	2.62
203324_s_at	CAV2	3.48	5.53	2.45
238919_at	238919_at	3.48	5.45	2.41
205625_s_at	CALB1	3.49	6.21	2.91
216059_at	PAX3	3.49	5.68	2.56
1564413_at	FLJ36116	3.5	6.14	2.87
205029_s_at	FABP7	3.53	6.67	3.18
232935_at	232935_at	3.54	6.07	2.82
205728_at	TENM1	3.55	4.68	1.88
221916_at	NEFL	3.56	6.72	3.21
213397_x_at	213397_x_at	3.56	6.71	3.2
244170_at	RAB3C	3.56	6.37	3
1554526_at	OLFM3	3.56	5.45	2.41
219355_at	CXorf57	3.57	6.62	3.14
210292_s_at	210292_s_at	3.58	5.2	2.24
225060_at	LRP11	3.59	6.5	3.08
217707_x_at	SMARCA2	3.59	5.82	2.65
1553132_a_at	TC2N	3.6	5.85	2.67
203973_s_at	CEBPD	3.61	6.49	3.08
213745_at	ATRNL1	3.62	6.69	3.19
202404_s_at	COL1A2	3.62	6.02	2.78
207679_at	PAX3	3.62	5.93	2.72
206653_at	POLR3G	3.62	5.17	2.21
213094_at	GPR126	3.63	5.72	2.59
200660_at	S100A11	3.64	6.83	3.27
222747_s_at	SCML1	3.64	6.82	3.27
204529_s_at	TOX	3.64	6.15	2.87
211668_s_at	PLAU	3.64	6.16	2.87
221801_x_at	NEFL	3.64	6.08	2.82
209211_at	KLF5	3.65	6.16	2.88
218858_at	DEPTOR	3.66	5.27	2.28
236180_at	236180_at	3.67	5.32	2.32
226748_at	LYSMD2	3.67	5.27	2.28
202403_s_at	COL1A2	3.68	6.3	2.96
213988_s_at	SAT1	3.68	4.92	2.05
1556638_at	PAX7	3.7	6.6	3.14
204595_s_at	STC1	3.71	6.81	3.26
210643_at	TNFSF11	3.71	5.31	2.31
209631_s_at	GPR37	3.72	6.43	3.04
227177_at	CORO2A	3.72	4.65	1.86
238877_at	EYA4	3.73	6.34	2.99
201438_at	COL6A3	3.73	6.31	2.96
216321_s_at	NR3C1	3.73	6.28	2.94
227297_at	ITGA9	3.73	5.18	2.22
225799_at	225799_at	3.74	5.92	2.71
204471_at	GAP43	3.75	6.82	3.27
200878_at	EPAS1	3.76	6.91	3.3
214111_at	OPCML	3.76	5.34	2.33
226636_at	PLD1	3.77	5.4	2.37
205942_s_at	ACSM3	3.78	6.38	3
1552712_a_at	NMNAT2	3.79	6.27	2.94
220030_at	STYK1	3.79	5.83	2.65
230623_x_at	USP28	3.81	6.81	3.26
237193_s_at	237193_s_at	3.81	6.59	3.13
221730_at	COL5A2	3.81	6.5	3.08
201131_s_at	CDH1	3.82	6.13	2.86
214811_at	RIMBP2	3.83	6.01	2.77
225171_at	ARHGAP18	3.84	6.94	3.32
228780_at	POU3F3	3.85	6.81	3.26
209897_s_at	SLIT2	3.86	6.61	3.14
223282_at	TSHZ1	3.86	6.58	3.13
230303_at	SYNPR	3.88	6.77	3.24
202935_s_at	SOX9	3.88	5.59	2.49
222446_s_at	BACE2	3.91	6.99	3.36
219932_at	SLC27A6	3.92	6.3	2.96
232720_at	LINGO2	3.93	6.73	3.21
235570_at	RBMS3	3.93	5.5	2.43
209966_x_at	ESRRG	3.95	5.85	2.67
206167_s_at	ARHGAP6	3.96	5.07	2.14
218793_s_at	SCML1	3.97	6.95	3.33
210839_s_at	ENPP2	3.97	6.8	3.26
226913_s_at	SOX8	3.97	6.53	3.1
204823_at	NAV3	3.97	6.52	3.09
227241_at	MUC15	4	6.99	3.36
1552658_a_at	NAV3	4	6.75	3.23
222108_at	AMIGO2	4.01	6.54	3.11
205479_s_at	PLAU	4.02	6.63	3.15
209921_at	SLC7A11	4.02	5.99	2.77
219474_at	C3orf52	4.02	5.9	2.7
210377_at	ACSM3	4.02	5.8	2.64
209392_at	ENPP2	4.03	6.55	3.11
1556421_at	LOC286189	4.03	6.47	3.07
225681_at	CTHRC1	4.05	6.63	3.15
205749_at	CYP1A1	4.06	6.61	3.14
203397_s_at	GALNT3	4.06	5.81	2.65
204597_x_at	STC1	4.08	7.01	3.36
226497_s_at	FLT1	4.08	6.36	2.99
209604_s_at	GATA3	4.09	6.5	3.08
207558_s_at	PITX2	4.12	6.21	2.91
223734_at	MGARP	4.13	6.88	3.29
236894_at	L1TD1	4.14	7.06	3.38
226117_at	TIFA	4.14	6.21	2.91
222802_at	EDN1	4.14	5.42	2.38
209480_at	HLA-DQB1	4.17	7.08	3.38
212510_at	GPD1L	4.17	7.08	3.38
206310_at	SPINK2	4.18	7	3.36
209406_at	BAG2	4.18	6.6	3.14
202202_s_at	LAMA4	4.19	6.6	3.14
239092_at	ITGA8	4.19	6.59	3.13
231380_at	C8orf34	4.2	7.11	3.4
229963_at	BEX5	4.2	6.88	3.29
227612_at	ELAVL3	4.2	6.85	3.28
229218_at	COL1A2	4.2	6.37	3
232151_at	MACC1	4.21	6.85	3.28
204112_s_at	HNMT	4.21	6.82	3.27
226751_at	CNRIP1	4.22	7.05	3.38
209757_s_at	MYCN	4.22	6.37	3
206701_x_at	EDNRB	4.23	5.91	2.7
205609_at	ANGPT1	4.25	6	2.77
233085_s_at	NABP1	4.26	7.13	3.41
1556629_a_at	SNAP25	4.27	6.61	3.14
226225_at	MCC	4.29	6.91	3.3
205626_s_at	CALB1	4.3	6.8	3.26
1556329_a_at	1556329_a_at	4.3	4.4	1.69
229797_at	MCOLN3	4.31	6.02	2.78
221805_at	NEFL	4.32	7.08	3.38
203543_s_at	KLF9	4.33	6.18	2.89
212681_at	EPB41L3	4.34	6.76	3.23
212543_at	AIM1	4.34	5.83	2.66
231666_at	PAX3	4.34	5.16	2.21
231411_at	LHFP	4.36	6.86	3.28
209469_at	GPM6A	4.38	6.71	3.2
227209_at	CNTN1	4.38	6.24	2.93
204646_at	DPYD	4.4	7.2	3.45
227856_at	C4orf32	4.4	6.5	3.08
204518_s_at	PPIC	4.42	7.28	3.49
230746_s_at	230746_s_at	4.42	5.51	2.43
211776_s_at	EPB41L3	4.43	7.29	3.5
227202_at	CNTN1	4.43	6.83	3.27
219054_at	NPR3	4.43	5.98	2.76
211470_s_at	SULT1C2	4.45	7.26	3.49
33323_r_at	SFN	4.46	7.25	3.49
234970_at	TC2N	4.47	6.78	3.24
206710_s_at	EPB41L3	4.48	5.94	2.73
239911_at	ONECUT2	4.49	6.34	2.99
239738_at	DACH2	4.49	6.11	2.84
222872_x_at	NABP1	4.52	7.36	3.52
237034_at	237034_at	4.52	5.92	2.71
228080_at	LAYN	4.53	6.92	3.31
237911_at	237911_at	4.53	6.34	2.98
203799_at	203799_at	4.54	6.85	3.27
226448_at	226448_at	4.56	7.04	3.38
227210_at	SFMBT2	4.56	6.86	3.28
213285_at	TMEM30B	4.56	6.1	2.84
222891_s_at	BCL11A	4.59	7.14	3.41
1553151_at	ATP6V0D2	4.61	6.35	2.99
206432_at	HAS2	4.64	6.07	2.82
228293_at	DEPDC7	4.66	7.25	3.49
228796_at	CPNE4	4.67	6.23	2.92
201005_at	CD9	4.69	7.18	3.44
216235_s_at	EDNRA	4.7	4.96	2.07
217678_at	SLC7A11	4.75	6.54	3.1
204865_at	CA3	4.75	6.23	2.92
210319_x_at	MSX2	4.79	6.6	3.14
228964_at	PRDM1	4.79	6	2.77
219995_s_at	ZNF750	4.83	5.39	2.36
213943_at	TWIST1	4.84	7.27	3.49
205342_s_at	SULT1C2	4.84	6.83	3.27
238453_at	FGFBP3	4.85	7.13	3.41
239572_at	GJA3	4.86	7.47	3.6
212614_at	ARID5B	4.89	6.89	3.29
228956_at	UGT8	4.95	6.78	3.24
237056_at	INSC	5.03	5.67	2.55
204491_at	PDE4D	5.04	6.89	3.29
227627_at	227627_at	5.08	7.24	3.48
239975_at	HLA-DPB2	5.09	7.29	3.5
219064_at	ITIH5	5.11	7.61	3.69
231166_at	GPR155	5.12	6.62	3.14
206239_s_at	SPINK1	5.14	6.24	2.93
203786_s_at	TPD52L1	5.19	7.6	3.69
230130_at	SLIT2	5.19	6.38	3
220038_at	220038_at	5.26	7.53	3.65
1566766_a_at	MACC1	5.26	7.01	3.36
204517_at	PPIC	5.26	7.01	3.36
203789_s_at	SEMA3C	5.27	7.21	3.45
209160_at	AKR1C3	5.27	6.68	3.18
226498_at	FLT1	5.28	6.48	3.07
227399_at	VGLL3	5.3	7.58	3.68
200872_at	S100A10	5.31	7.66	3.69
212188_at	KCTD12	5.33	7.16	3.43
206941_x_at	SEMA3E	5.33	5.45	2.41
230765_at	KIAA1239	5.35	6.09	2.83
205286_at	TFAP2C	5.39	7.2	3.45
213503_x_at	ANXA2	5.43	7.7	3.69
205287_s_at	TFAP2C	5.43	7.4	3.55
201590_x_at	ANXA2	5.48	7.62	3.69
209755_at	NMNAT2	5.49	6.7	3.2
210427_x_at	ANXA2	5.5	7.67	3.69
204115_at	GNG11	5.51	7.61	3.69
204271_s_at	EDNRB	5.51	6.54	3.1
1552678_a_at	USP28	5.57	7.77	3.69
209470_s_at	GPM6A	5.59	7.69	3.69
205923_at	RELN	5.61	6.87	3.28
232054_at	PCDH20	5.64	6.38	3
201860_s_at	PLAT	5.69	5.85	2.67
223044_at	SLC40A1	5.7	6.6	3.14
228850_s_at	SLIT2	5.76	7.61	3.69
226302_at	ATP8B1	5.87	6.45	3.05
231930_at	231930_at	5.89	7.34	3.52
213373_s_at	CASP8	5.89	6.15	2.87
1554547_at	FAM13C	5.91	7.68	3.69
206280_at	CDH18	5.96	7.45	3.58
229580_at	229580_at	5.99	6.64	3.16
210372_s_at	TPD52L1	6.03	7.3	3.5
204273_at	EDNRB	6.23	7.66	3.69
218656_s_at	LHFP	6.24	7.26	3.49
214974_x_at	CXCL5	6.42	6.25	2.93
227450_at	ERP27	6.43	7.88	3.77
238447_at	RBMS3	6.53	8.04	3.86
229498_at	MBNL3	6.61	7.74	3.69
209199_s_at	MEF2C	6.62	7.78	3.7
209803_s_at	PHLDA2	6.77	8.09	3.87
226213_at	ERBB3	6.8	5.47	2.42
202454_s_at	ERBB3	6.81	7.26	3.49
219814_at	MBNL3	6.88	6.75	3.23
229004_at	ADAMTS15	6.9	7.61	3.69
201324_at	EMP1	6.95	6.65	3.16
219179_at	DACT1	6.97	7.06	3.38
213107_at	TNIK	7	7.65	3.69
242871_at	PAQR5	7.1	7.13	3.41
1553613_s_at	FOXC1	7.11	8.23	3.96
209200_at	MEF2C	7.14	8.07	3.86
206286_s_at	206286_s_at	7.14	7.66	3.69
201963_at	ACSL1	7.16	7.24	3.48
206001_at	NPY	7.18	7.65	3.69
243555_at	243555_at	7.22	6.32	2.97
226281_at	DNER	7.29	7.92	3.79
230423_at	230423_at	7.31	7.82	3.73
218468_s_at	GREM1	7.32	7.74	3.69
218764_at	PRKCH	7.32	7.49	3.61
236359_at	SCN4B	7.35	7.07	3.38
230895_at	HAPLN1	7.37	7.9	3.77
216259_at	LOC100506699	7.42	5.32	2.32
213109_at	TNIK	7.63	7.55	3.66
232116_at	GRHL3	7.63	7.13	3.41
209840_s_at	LRRN3	7.69	7.84	3.74
242344_at	GABRB2	7.69	7.35	3.52
209687_at	CXCL12	7.89	6.99	3.36
228716_at	THRB	7.92	8.2	3.95
206332_s_at	IFI16	8.05	8.04	3.86
218469_at	GREM1	8.1	7.34	3.52
236045_x_at	236045_x_at	8.14	8.4	4.06
204464_s_at	EDNRA	8.15	6.46	3.06
205113_at	NEFM	8.19	7.59	3.68
205524_s_at	HAPLN1	8.56	8.53	4.09
210145_at	PLA2G4A	8.61	8.28	3.98
209841_s_at	LRRN3	8.66	8.14	3.91
208096_s_at	COL21A1	9.01	8.59	4.1
228635_at	PCDH10	9.09	7.34	3.52
208966_x_at	IFI16	9.12	8.54	4.09
227238_at	MUC15	9.16	7.51	3.63
237375_at	237375_at	9.19	8.39	4.06
241986_at	BMPER	9.33	8.28	3.98
240055_at	240055_at	9.35	8.49	4.07
209875_s_at	SPP1	9.42	6.83	3.27
226534_at	KITLG	9.53	8.6	4.1
238914_at	DCC	9.65	7.7	3.69
212192_at	KCTD12	9.96	8.17	3.93
241550_at	DPPA5	9.96	6.65	3.16
218589_at	LPAR6	10.12	8.24	3.96
205431_s_at	BMP5	10.27	8.76	4.11
204463_s_at	EDNRA	10.4	7.09	3.38
202436_s_at	CYP1B1	10.62	8.65	4.1
202435_s_at	CYP1B1	10.66	8.62	4.1
211828_s_at	TNIK	10.74	8.47	4.07
208965_s_at	IFI16	11.11	8.41	4.06
228335_at	CLDN11	11.14	7.92	3.79
228347_at	SIX1	11.2	7.66	3.69
202286_s_at	TACSTD2	11.26	7.18	3.44
229125_at	KANK4	11.85	6.88	3.29
1559280_a_at	LOC100506013	12.36	7.3	3.5
214265_at	ITGA8	12.63	8.96	4.24
220184_at	NANOG	13.03	8.57	4.1
202508_s_at	SNAP25	13.23	9	4.24
209723_at	SERPINB9	13.71	8.38	4.06
230204_at	HAPLN1	14.12	8.84	4.16
202437_s_at	CYP1B1	14.51	9.28	4.32
235666_at	ITGA8	14.54	8.63	4.1
243610_at	C9orf135	15.38	8.43	4.06
205430_at	BMP5	15.93	9.13	4.24
228875_at	FAM162B	16.73	8.96	4.24
205523_at	HAPLN1	17.24	7.75	3.69
1553394_a_at	TFAP2B	17.69	9.34	4.32
224833_at	ETS1	18.04	9.07	4.24
204653_at	TFAP2A	19.5	8.64	4.1
241612_at	FOXD3	21.88	9.35	4.32
214451_at	TFAP2B	24.01	9.55	4.32
239206_at	CR1L	26.1	9.72	4.32
213139_at	SNAI2	26.16	9.4	4.32
239205_s_at	239205_s_at	51.9	10.52	4.72

## Sheet: 650
650 µM VPA
ID	symbol	fold change	-log(p-value)	-log(p-value) BY-adjusted
221086_s_at	FEZF2	0.05	6.49	2.35
233972_s_at	FEZF2	0.06	6.94	2.41
238878_at	ARX	0.1	4.39	1.41
237472_at	SOX1	0.12	5.27	1.89
1554314_at	C6orf141	0.13	6.12	2.25
1556378_a_at	LOC440896	0.13	5.57	2.03
220087_at	BCMO1	0.14	5.92	2.18
1555800_at	ZNF385B	0.14	5.36	1.93
229085_at	LRRC3B	0.14	4.37	1.39
242054_s_at	SIX3	0.15	6.29	2.33
1555801_s_at	ZNF385B	0.15	6.01	2.22
207443_at	NR2E1	0.2	6.68	2.4
1552575_a_at	C6orf141	0.2	6.01	2.22
211427_s_at	KCNJ13	0.2	5.1	1.79
237322_at	MIAT	0.2	4.26	1.34
213912_at	TBC1D30	0.21	6.32	2.33
213913_s_at	TBC1D30	0.22	6.26	2.33
231898_x_at	SOX2-OT	0.22	6.34	2.33
210179_at	KCNJ13	0.22	6	2.21
238755_at	RASSF10	0.22	5.85	2.16
238625_at	C1orf168	0.22	5.5	2
243672_at	SALL3	0.22	4.58	1.5
230147_at	F2RL2	0.23	6.2	2.3
226279_at	PRSS23	0.23	5.85	2.16
1553411_s_at	SALL3	0.23	4.47	1.45
232847_at	SALL3	0.23	4.47	1.45
230785_at	230785_at	0.23	4.22	1.31
229441_at	PRSS23	0.25	6.09	2.25
220519_s_at	LIM2	0.26	5.44	1.97
229019_at	ZNF385B	0.26	4.55	1.49
210493_s_at	MFAP3L	0.26	4.54	1.48
1561969_at	ZPLD1	0.26	4.41	1.42
1552520_at	TMEM74	0.26	4.26	1.33
202458_at	PRSS23	0.27	5.61	2.05
231800_s_at	DMRT3	0.27	5.21	1.85
1558388_a_at	UG0898H09	0.28	4.66	1.55
206140_at	LHX2	0.29	5.96	2.2
206634_at	SIX3	0.29	5.68	2.09
224774_s_at	NAV1	0.29	5.2	1.85
213843_x_at	SLC6A8	0.3	5.71	2.1
223552_at	LRRC4	0.31	5.7	2.1
1560652_at	1560652_at	0.31	5.06	1.76
239556_at	LOC645513	0.31	4.92	1.7
1557945_at	TCTE3	0.31	4.61	1.52
244116_at	244116_at	0.32	5.3	1.9
202708_s_at	HIST2H2BE	0.32	5.05	1.76
223468_s_at	RGMA	0.32	4.76	1.61
232826_at	232826_at	0.32	4.74	1.6
204663_at	ME3	0.32	4.32	1.37
1564383_s_at	FLJ35934	0.34	5.09	1.78
240713_s_at	240713_s_at	0.34	4.36	1.39
228885_at	MAMDC2	0.35	5.46	1.98
243996_at	243996_at	0.35	5.46	1.98
240259_at	240259_at	0.35	5.11	1.79
221245_s_at	FZD5	0.35	4.59	1.51
224773_at	NAV1	0.35	4.41	1.42
214774_x_at	TOX3	0.35	4.33	1.38
219820_at	SLC6A16	0.36	5.08	1.77
1566152_a_at	1566152_a_at	0.36	4.84	1.65
206157_at	PTX3	0.36	4.57	1.5
210854_x_at	SLC6A8	0.36	4.38	1.4
224215_s_at	DLL1	0.36	4.32	1.37
1559067_a_at	LOC158402	0.36	4.23	1.32
1552296_at	BEST4	0.37	4.52	1.47
224772_at	NAV1	0.37	4.47	1.45
1565595_at	1565595_at	0.37	4.27	1.34
207103_at	KCND2	0.37	4.24	1.32
215108_x_at	TOX3	0.37	4.21	1.3
205659_at	HDAC9	0.38	5.09	1.78
244133_at	USP49	0.38	4.9	1.69
1561158_at	1561158_at	0.38	4.86	1.66
218541_s_at	C8orf4	0.38	4.24	1.32
238129_s_at	FZD2	0.39	4.51	1.47
209560_s_at	DLK1	0.39	4.4	1.41
236918_s_at	LRRC34	0.4	4.59	1.51
204914_s_at	SOX11	0.4	4.55	1.49
228387_at	LOC100996511	0.4	4.56	1.49
223121_s_at	SFRP2	0.4	4.48	1.45
227584_at	NAV1	0.4	4.22	1.31
202769_at	CCNG2	0.41	4.95	1.72
205710_at	LRP2	0.41	4.48	1.45
221901_at	KIAA1644	0.42	4.93	1.7
211559_s_at	CCNG2	0.42	4.74	1.6
202770_s_at	CCNG2	0.42	4.69	1.57
205883_at	ZBTB16	0.42	4.6	1.51
232989_s_at	CCDC136	0.42	4.42	1.42
206731_at	CNKSR2	0.42	4.32	1.37
205041_s_at	205041_s_at	0.43	4.71	1.58
1553764_a_at	AJUBA	0.43	4.61	1.52
213283_s_at	SALL2	0.43	4.54	1.48
209806_at	HIST1H2BK	0.43	4.51	1.47
204915_s_at	SOX11	0.43	4.47	1.45
222783_s_at	SMOC1	0.43	4.49	1.45
1557066_at	LUC7L	0.43	4.33	1.38
244271_at	244271_at	0.44	4.61	1.52
1556160_a_at	1556160_a_at	0.45	4.54	1.48
223161_at	KIAA1147	0.45	4.53	1.48
210220_at	FZD2	0.45	4.44	1.44
227575_s_at	NRDE2	0.45	4.29	1.35
1570507_at	SCAF11	0.46	4.68	1.56
206956_at	206956_at	0.46	4.6	1.51
220474_at	SLC25A21	0.46	4.54	1.48
1556659_at	1556659_at	0.46	4.49	1.45
230664_at	H2BFXP	0.46	4.49	1.45
238785_at	238785_at	0.46	4.45	1.44
235072_s_at	KIF13A	0.46	4.35	1.38
236273_at	NBPF1	0.46	4.34	1.38
1559964_at	FLJ38717	0.46	4.26	1.34
214500_at	H2AFY	0.47	4.58	1.5
220436_at	LOC441402	0.47	4.46	1.45
239649_at	239649_at	0.47	4.47	1.45
244490_at	LOC100996511	0.47	4.35	1.39
227020_at	YPEL2	0.47	4.33	1.38
1559510_at	LINC00630	0.48	4.37	1.39
204121_at	GADD45G	0.48	4.28	1.35
204913_s_at	SOX11	0.48	4.27	1.34
215812_s_at	215812_s_at	0.49	4.44	1.44
228828_at	BZRAP1-AS1	0.49	4.41	1.42
52837_at	KIAA1644	0.51	4.27	1.34
238012_at	DPP7	0.51	4.23	1.32
242277_at	242277_at	0.51	4.24	1.32
224566_at	224566_at	1.96	4.2	1.3
213436_at	CNR1	1.97	4.24	1.32
209159_s_at	NDRG4	1.98	4.26	1.34
227282_at	PCDH19	1.98	4.25	1.33
223541_at	HAS3	1.99	4.3	1.36
1552695_a_at	SLC2A13	1.99	4.23	1.32
226658_at	PDPN	2	4.32	1.37
222719_s_at	PDGFC	2	4.3	1.36
200782_at	ANXA5	2.01	4.34	1.38
231381_at	ESRG	2.01	4.34	1.38
1553299_at	DUSP5P1	2.01	4.33	1.37
235201_at	FOXP2	2.02	4.27	1.34
231991_at	CCM2L	2.03	4.4	1.41
207480_s_at	MEIS2	2.03	4.38	1.4
1553179_at	ADAMTS19	2.04	4.35	1.39
239835_at	KBTBD8	2.04	4.36	1.39
211518_s_at	BMP4	2.05	4.34	1.38
1561242_at	1561242_at	2.05	4.28	1.35
201251_at	PKM	2.06	4.45	1.44
201842_s_at	EFEMP1	2.06	4.45	1.44
203725_at	GADD45A	2.06	4.31	1.37
223398_at	C9orf89	2.06	4.28	1.35
213388_at	213388_at	2.06	4.23	1.32
224925_at	PREX1	2.07	4.44	1.44
219654_at	PTPLA	2.07	4.42	1.43
204224_s_at	GCH1	2.07	4.4	1.41
228100_at	PIFO	2.07	4.26	1.34
214298_x_at	2006-09-01	2.07	4.24	1.32
203836_s_at	MAP3K5	2.08	4.33	1.38
224970_at	NFIA	2.08	4.33	1.38
217728_at	S100A6	2.08	4.32	1.37
209598_at	PNMA2	2.08	4.25	1.33
230973_at	SH2D5	2.09	4.5	1.46
204479_at	OSTF1	2.09	4.47	1.45
226806_s_at	NFIA	2.09	4.45	1.44
212413_at	2006-09-01	2.1	4.54	1.48
226796_at	ABHD15	2.1	4.48	1.45
200650_s_at	LDHA	2.11	4.34	1.38
243278_at	FOXP2	2.11	4.32	1.37
213533_at	NSG1	2.11	4.29	1.35
205043_at	CFTR	2.11	4.24	1.32
200916_at	TAGLN2	2.12	4.54	1.48
231270_at	231270_at	2.12	4.47	1.45
1554777_at	ZFP42	2.12	4.44	1.44
226269_at	GDAP1	2.12	4.36	1.39
222874_s_at	CLN8	2.13	4.56	1.5
201231_s_at	ENO1	2.13	4.48	1.45
202023_at	EFNA1	2.13	4.45	1.44
214586_at	GPR37	2.13	4.38	1.4
203339_at	SLC25A12	2.13	4.36	1.39
219305_x_at	FBXO2	2.13	4.29	1.35
226132_s_at	MANEAL	2.13	4.21	1.3
228098_s_at	MYLIP	2.14	4.5	1.46
212489_at	COL5A1	2.14	4.47	1.45
236048_at	LHFPL1	2.15	4.58	1.5
214162_at	LOC284244	2.15	4.55	1.49
222662_at	PPP1R3B	2.15	4.33	1.38
229024_at	229024_at	2.16	4.38	1.4
240395_at	LOC100128727	2.16	4.38	1.4
204613_at	PLCG2	2.17	4.64	1.54
214129_at	214129_at	2.17	4.58	1.5
203914_x_at	HPGD	2.17	4.38	1.4
217287_s_at	TRPC6	2.17	4.28	1.35
209569_x_at	NSG1	2.19	4.62	1.52
214531_s_at	SNX1	2.19	4.62	1.52
230807_at	CCDC151	2.19	4.61	1.52
209457_at	DUSP5	2.21	4.32	1.37
204547_at	RAB40B	2.22	4.64	1.54
240119_at	TEPP	2.22	4.65	1.54
234303_s_at	GPR85	2.23	4.69	1.57
202554_s_at	GSTM3	2.23	4.68	1.56
238537_at	CA8	2.24	4.35	1.39
205749_at	CYP1A1	2.24	4.22	1.31
213424_at	KIAA0895	2.25	4.65	1.54
202196_s_at	DKK3	2.25	4.59	1.51
207197_at	ZIC3	2.25	4.31	1.36
221268_s_at	SGPP1	2.25	4.31	1.36
206023_at	NMU	2.26	4.59	1.51
215726_s_at	CYB5A	2.26	4.49	1.45
232760_at	TEX15	2.26	4.48	1.45
225567_at	LOC100505573	2.26	4.38	1.4
214787_at	DENND4A	2.27	4.79	1.63
210601_at	CDH6	2.27	4.64	1.54
200911_s_at	TACC1	2.27	4.61	1.52
244050_at	PTPLAD2	2.27	4.6	1.51
235737_at	TSLP	2.27	4.38	1.4
236277_at	236277_at	2.28	4.69	1.57
205328_at	CLDN10	2.28	4.59	1.51
201847_at	LIPA	2.28	4.51	1.47
217356_s_at	PGK1	2.28	4.34	1.38
209708_at	MOXD1	2.29	4.8	1.63
219867_at	CHODL	2.29	4.74	1.6
229088_at	ENPP1	2.29	4.3	1.36
215594_at	ERV9-1	2.3	4.62	1.52
206803_at	PDYN	2.3	4.37	1.39
205618_at	PRRG1	2.3	4.34	1.38
213435_at	SATB2	2.31	4.73	1.6
218704_at	RNF43	2.31	4.7	1.57
223283_s_at	TSHZ1	2.31	4.53	1.48
225817_at	CGNL1	2.31	4.39	1.41
226905_at	FAM101B	2.31	4.35	1.39
229168_at	COL23A1	2.31	4.3	1.36
214247_s_at	DKK3	2.32	4.8	1.63
205498_at	GHR	2.32	4.78	1.62
226301_at	SLC18B1	2.32	4.78	1.62
224999_at	EGFR	2.32	4.74	1.6
201037_at	PFKP	2.32	4.57	1.5
202528_at	GALE	2.32	4.55	1.49
214993_at	ASPHD1	2.33	4.65	1.54
227984_at	LMF1	2.33	4.58	1.5
204466_s_at	SNCA	2.33	4.41	1.42
219498_s_at	BCL11A	2.33	4.37	1.4
233675_s_at	TPTE2P6	2.33	4.39	1.4
223278_at	GJB2	2.34	4.89	1.68
202672_s_at	ATF3	2.34	4.86	1.66
227038_at	SGMS2	2.34	4.79	1.63
213664_at	SLC1A1	2.34	4.78	1.62
223437_at	PPARA	2.34	4.29	1.35
230356_at	230356_at	2.34	4.28	1.35
207843_x_at	CYB5A	2.34	4.24	1.32
202934_at	HK2	2.35	4.9	1.69
213666_at	2006-09-01	2.35	4.76	1.61
1552727_s_at	ADAMTS17	2.35	4.2	1.3
228441_s_at	228441_s_at	2.36	4.47	1.45
1554283_at	CCRN4L	2.36	4.4	1.41
208018_s_at	HCK	2.36	4.4	1.41
225081_s_at	CDCA7L	2.37	4.47	1.45
216840_s_at	LAMA2	2.37	4.21	1.3
209570_s_at	NSG1	2.38	4.77	1.62
209366_x_at	CYB5A	2.38	4.61	1.52
227394_at	NCAM1	2.38	4.31	1.36
204467_s_at	SNCA	2.38	4.21	1.3
212122_at	RHOQ	2.39	4.59	1.51
214022_s_at	IFITM1	2.39	4.54	1.48
225639_at	SKAP2	2.39	4.37	1.4
225202_at	RHOBTB3	2.39	4.23	1.32
222486_s_at	ADAMTS1	2.4	4.84	1.65
207275_s_at	ACSL1	2.4	4.29	1.35
227068_at	PGK1	2.41	4.44	1.43
201136_at	PLP2	2.41	4.38	1.4
236734_at	SLITRK1	2.41	4.28	1.35
200737_at	PGK1	2.41	4.27	1.34
219740_at	VASH2	2.42	4.98	1.73
201952_at	ALCAM	2.42	4.62	1.52
203324_s_at	CAV2	2.42	4.54	1.48
226955_at	AFAP1L1	2.42	4.41	1.42
210602_s_at	CDH6	2.42	4.36	1.39
227070_at	GLT8D2	2.42	4.36	1.39
1555867_at	GNG4	2.43	5.01	1.74
228565_at	KIAA1804	2.43	4.9	1.69
241925_x_at	SLC16A7	2.43	4.64	1.54
1555526_a_at	2006-09-01	2.44	5.03	1.75
204949_at	ICAM3	2.44	4.97	1.72
211654_x_at	HLA-DQB1	2.44	4.91	1.7
239319_at	LOC728342	2.44	4.89	1.68
228624_at	TMEM144	2.44	4.51	1.47
202976_s_at	RHOBTB3	2.44	4.45	1.44
221447_s_at	GLT8D2	2.44	4.24	1.32
1554352_s_at	DENND4A	2.45	4.92	1.7
205399_at	DCLK1	2.45	4.8	1.63
232166_at	KIAA1377	2.45	4.25	1.33
212998_x_at	HLA-DQB1	2.46	5.05	1.76
213558_at	PCLO	2.46	4.69	1.57
228708_at	RAB27B	2.46	4.63	1.53
224848_at	CDK6	2.46	4.61	1.52
238584_at	IQCA1	2.46	4.58	1.5
215867_x_at	CA12	2.47	4.99	1.73
235117_at	CHAC2	2.47	4.96	1.72
210754_s_at	LYN	2.47	4.5	1.46
1554474_a_at	MOXD1	2.47	4.36	1.39
227084_at	DTNA	2.48	5	1.73
203813_s_at	SLIT3	2.48	4.46	1.44
218681_s_at	SDF2L1	2.49	5.08	1.77
204260_at	CHGB	2.49	5.06	1.76
243000_at	CDK6	2.49	4.76	1.61
227410_at	FAM43A	2.49	4.48	1.45
225972_at	TMEM64	2.5	5.13	1.8
209212_s_at	KLF5	2.5	5.05	1.76
226066_at	MITF	2.5	4.96	1.72
202626_s_at	LYN	2.5	4.9	1.69
212923_s_at	PXDC1	2.5	4.74	1.6
213744_at	ATRNL1	2.5	4.35	1.39
232275_s_at	HS6ST3	2.51	5.07	1.77
242463_x_at	ZNF600	2.51	4.82	1.64
219569_s_at	SLC35G2	2.51	4.45	1.44
202546_at	VAMP8	2.51	4.29	1.35
214719_at	SLC46A3	2.52	4.64	1.54
1552485_at	LACTB	2.52	4.56	1.49
203304_at	BAMBI	2.52	4.34	1.38
1553180_at	ADAMTS19	2.54	5.11	1.79
204679_at	KCNK1	2.54	5.01	1.74
222162_s_at	ADAMTS1	2.54	4.69	1.57
1553654_at	SYT14	2.54	4.43	1.43
225974_at	TMEM64	2.55	5.11	1.79
202936_s_at	SOX9	2.55	4.81	1.64
223316_at	CCDC3	2.55	4.8	1.63
237159_x_at	AP1S3	2.55	4.77	1.62
204326_x_at	MT1X	2.55	4.35	1.39
1569796_s_at	ATRNL1	2.56	5.17	1.83
205259_at	NR3C2	2.56	4.76	1.61
227566_at	227566_at	2.57	5.04	1.76
220868_s_at	SLC7A10	2.57	4.5	1.46
214434_at	HSPA12A	2.58	5.13	1.8
231195_at	KLRG2	2.58	4.97	1.72
201843_s_at	EFEMP1	2.58	4.76	1.62
201422_at	IFI30	2.58	4.56	1.49
228377_at	KLHL14	2.59	5.21	1.85
220448_at	KCNK12	2.59	4.91	1.7
228937_at	LACC1	2.59	4.27	1.34
205638_at	BAI3	2.6	5.16	1.82
203542_s_at	KLF9	2.6	5.02	1.74
226782_at	SLC25A30	2.6	4.99	1.73
230276_at	FAM49A	2.6	4.69	1.57
220761_s_at	TAOK3	2.61	5.23	1.86
242338_at	TMEM64	2.61	4.92	1.7
205555_s_at	MSX2	2.61	4.85	1.66
203857_s_at	PDIA5	2.61	4.69	1.57
208949_s_at	LGALS3	2.61	4.52	1.47
223503_at	TMEM163	2.62	4.86	1.66
229461_x_at	NEGR1	2.62	4.82	1.64
242447_at	C3orf70	2.62	4.77	1.62
213929_at	EXPH5	2.62	4.29	1.35
205850_s_at	GABRB3	2.63	5.19	1.84
205066_s_at	ENPP1	2.63	5.16	1.83
222088_s_at	222088_s_at	2.63	4.9	1.69
221605_s_at	PIPOX	2.63	4.83	1.65
1554887_at	1554887_at	2.64	4.98	1.73
232226_at	LRRC4C	2.64	4.98	1.73
218699_at	RAB7L1	2.64	4.91	1.7
202499_s_at	SLC2A3	2.64	4.48	1.45
206382_s_at	BDNF	2.64	4.49	1.45
219984_s_at	HRASLS	2.65	5.05	1.76
203814_s_at	NQO2	2.65	5.02	1.74
204851_s_at	DCX	2.65	4.95	1.72
1569872_a_at	LMF1	2.66	5.12	1.8
242517_at	KISS1R	2.66	4.86	1.66
1569362_at	ALCAM	2.66	4.64	1.54
205528_s_at	RUNX1T1	2.66	4.53	1.48
206043_s_at	ATP2C2	2.66	4.53	1.48
208092_s_at	FAM49A	2.66	4.43	1.43
213093_at	PRKCA	2.67	4.93	1.7
202363_at	SPOCK1	2.67	4.66	1.54
224847_at	CDK6	2.67	4.49	1.45
219147_s_at	NMRK1	2.68	5.01	1.74
208370_s_at	RCAN1	2.68	4.99	1.73
202497_x_at	SLC2A3	2.68	4.85	1.66
213455_at	FAM114A1	2.69	5.31	1.91
221898_at	PDPN	2.69	5.05	1.76
202800_at	SLC1A3	2.69	4.84	1.66
227764_at	LYPD6	2.69	4.48	1.45
217294_s_at	ENO1	2.7	5.24	1.86
216236_s_at	216236_s_at	2.7	4.83	1.65
204712_at	WIF1	2.7	4.31	1.37
228568_at	228568_at	2.7	4.2	1.3
235956_at	KIAA1377	2.71	4.96	1.72
240254_at	240254_at	2.71	4.9	1.69
229300_at	RAB3C	2.71	4.82	1.64
206460_at	AJAP1	2.71	4.66	1.55
230630_at	230630_at	2.71	4.35	1.38
1556421_at	LOC286189	2.72	5.25	1.87
229139_at	JPH1	2.72	4.21	1.3
210431_at	ALPPL2	2.73	5.29	1.89
201117_s_at	CPE	2.73	5.23	1.86
202747_s_at	ITM2A	2.73	5.21	1.85
224400_s_at	CHST9	2.74	5.35	1.93
201601_x_at	201601_x_at	2.74	5.34	1.92
213050_at	COBL	2.74	4.93	1.7
202498_s_at	SLC2A3	2.74	4.79	1.62
230233_at	230233_at	2.74	4.47	1.45
207174_at	GPC5	2.76	5.39	1.95
203913_s_at	HPGD	2.76	5.17	1.83
223130_s_at	MYLIP	2.76	5.1	1.78
205081_at	CRIP1	2.76	4.94	1.71
215241_at	ANO3	2.77	5.09	1.78
230262_at	ST8SIA3	2.77	5.07	1.77
203131_at	PDGFRA	2.77	4.78	1.62
208216_at	DLX4	2.77	4.67	1.55
223737_x_at	CHST9	2.78	5.39	1.95
205051_s_at	KIT	2.78	4.44	1.44
1552736_a_at	NETO1	2.78	4.43	1.43
230464_at	S1PR5	2.79	4.44	1.44
227817_at	PRKCB	2.8	5.39	1.95
227690_at	GABRB3	2.8	5.35	1.93
202625_at	LYN	2.8	4.77	1.62
200660_at	S100A11	2.8	4.31	1.37
218723_s_at	RGCC	2.8	4.2	1.3
226354_at	LACTB	2.81	5.44	1.97
230496_at	AMER2	2.81	5.1	1.79
201116_s_at	CPE	2.82	5.44	1.97
239913_at	SLC10A4	2.82	5.16	1.83
214164_x_at	CA12	2.82	4.56	1.49
210807_s_at	SLC16A7	2.83	5.35	1.93
215271_at	TNN	2.83	5.02	1.74
204850_s_at	DCX	2.83	4.75	1.61
213316_at	KIAA1462	2.83	4.72	1.59
230769_at	DENND2C	2.84	5.43	1.97
1552694_at	SLC2A13	2.84	5.11	1.79
219863_at	HERC5	2.84	4.23	1.32
226978_at	PPARA	2.85	5.38	1.94
226985_at	FGD5	2.85	5.21	1.85
222651_s_at	TRPS1	2.85	4.65	1.54
224975_at	NFIA	2.86	5.52	2.01
202935_s_at	SOX9	2.86	4.69	1.57
235287_at	CDK6	2.86	4.5	1.46
232327_at	THSD7B	2.87	5.48	1.99
219106_s_at	KLHL41	2.87	5	1.73
208065_at	ST8SIA3	2.87	4.3	1.36
202375_at	SEC24D	2.88	5.53	2.02
206247_at	MICB	2.89	5.41	1.96
225626_at	PAG1	2.89	5	1.74
233536_at	ASXL3	2.89	4.91	1.7
226452_at	PDK1	2.9	5.55	2.03
218189_s_at	NANS	2.9	5.3	1.9
226938_at	DCAF4	2.9	4.96	1.72
216059_at	PAX3	2.9	4.58	1.5
204702_s_at	NFE2L3	2.9	4.2	1.3
230003_at	230003_at	2.91	4.62	1.52
219622_at	RAB20	2.91	4.3	1.36
209685_s_at	PRKCB	2.92	5.18	1.84
221729_at	COL5A2	2.92	4.7	1.57
203000_at	STMN2	2.93	5.54	2.02
227742_at	CLIC6	2.94	5.24	1.87
204348_s_at	204348_s_at	2.94	4.24	1.32
225664_at	COL12A1	2.94	4.23	1.32
205533_s_at	CDH6	2.95	5.57	2.03
217867_x_at	BACE2	2.95	5.54	2.02
203001_s_at	STMN2	2.95	5.52	2.01
205542_at	STEAP1	2.96	5.57	2.03
235343_at	VASH2	2.96	5.58	2.03
207014_at	GABRA2	2.96	4.38	1.4
208146_s_at	CPVL	2.98	4.86	1.66
1562389_at	1562389_at	2.98	4.46	1.44
203518_at	LYST	2.99	5.03	1.75
202975_s_at	RHOBTB3	2.99	4.35	1.39
231380_at	C8orf34	3	5.38	1.94
202719_s_at	TES	3	4.85	1.66
223611_s_at	LNX1	3.01	5.65	2.08
203963_at	CA12	3.01	5.47	1.98
204955_at	SRPX	3.02	5.65	2.08
231842_at	KIAA1462	3.02	5.26	1.88
219497_s_at	BCL11A	3.03	5.56	2.03
1554655_a_at	RPRML	3.03	5.32	1.91
205538_at	CORO2A	3.03	4.42	1.42
201849_at	BNIP3	3.03	4.37	1.4
202403_s_at	COL1A2	3.03	4.3	1.36
205111_s_at	PLCE1	3.04	4.64	1.53
226748_at	LYSMD2	3.05	4.86	1.66
206544_x_at	SMARCA2	3.06	5.44	1.97
203710_at	ITPR1	3.06	5.08	1.77
205977_s_at	EPHA1	3.08	4.92	1.7
231798_at	NOG	3.09	5.16	1.83
202733_at	P4HA2	3.09	4.85	1.66
202404_s_at	COL1A2	3.09	4.6	1.51
207957_s_at	PRKCB	3.1	5.3	1.9
209676_at	TFPI	3.1	4.22	1.31
239533_at	GPR155	3.11	5	1.73
1554690_a_at	TACC1	3.11	4.75	1.61
205738_s_at	FABP3	3.11	4.49	1.45
204337_at	RGS4	3.12	4.8	1.63
239457_at	ATP8B3	3.13	4.57	1.5
235174_s_at	LOC100128822	3.14	5.38	1.94
205030_at	FABP7	3.14	5.34	1.92
219983_at	HRASLS	3.15	5.7	2.1
1554079_at	GALNT18	3.15	5.66	2.08
217762_s_at	RAB31	3.15	5.46	1.98
225342_at	225342_at	3.15	4.6	1.52
205141_at	ANG	3.17	4.99	1.73
213933_at	PTGER3	3.17	4.51	1.47
205942_s_at	ACSM3	3.18	4.3	1.36
229724_at	GABRB3	3.19	5.63	2.06
212741_at	MAOA	3.19	5.21	1.85
213375_s_at	N4BP2L1	3.19	5.12	1.79
1569476_at	DKFZP434L187	3.2	5.33	1.92
205532_s_at	CDH6	3.2	5.26	1.88
227830_at	GABRB3	3.2	5.21	1.85
230271_at	ONECUT2	3.2	4.31	1.37
207679_at	PAX3	3.22	5.55	2.03
218995_s_at	EDN1	3.22	4.32	1.37
227182_at	SUSD3	3.23	5.33	1.92
223423_at	GPR160	3.25	4.79	1.63
224851_at	CDK6	3.26	4.91	1.69
217764_s_at	RAB31	3.28	5.86	2.16
203423_at	RBP1	3.28	5.38	1.94
231666_at	PAX3	3.28	4.87	1.67
219355_at	CXorf57	3.29	5.39	1.95
207981_s_at	ESRRG	3.3	5.73	2.11
226731_at	226731_at	3.3	5.19	1.84
227862_at	TRNP1	3.31	5.35	1.93
236471_at	NFE2L3	3.32	5.04	1.75
214369_s_at	RASGRP2	3.32	4.81	1.63
227703_s_at	SYTL4	3.32	4.48	1.45
205029_s_at	FABP7	3.33	5.51	2.01
207057_at	SLC16A7	3.33	5.31	1.9
209392_at	ENPP2	3.33	5.29	1.9
221730_at	COL5A2	3.33	5.27	1.88
236180_at	236180_at	3.33	4.78	1.62
226117_at	TIFA	3.35	4.52	1.47
202746_at	ITM2A	3.36	5.92	2.18
227099_s_at	C11orf96	3.39	4.97	1.72
219196_at	SCG3	3.4	5.8	2.15
210643_at	TNFSF11	3.41	5.95	2.2
226560_at	226560_at	3.41	5.83	2.16
231336_at	CPNE4	3.41	5.17	1.83
233446_at	ONECUT2	3.41	4.59	1.51
214974_x_at	CXCL5	3.41	4.49	1.45
221019_s_at	COLEC12	3.43	4.34	1.38
202620_s_at	PLOD2	3.44	4.97	1.72
227641_at	FBXL16	3.44	4.36	1.39
210839_s_at	ENPP2	3.45	5.67	2.09
201865_x_at	NR3C1	3.45	5.66	2.08
226186_at	TMOD2	3.45	4.69	1.57
221773_at	ELK3	3.47	5.26	1.88
231837_at	USP28	3.47	4.56	1.49
203066_at	CHST15	3.49	5.39	1.95
211597_s_at	HOPX	3.49	4.98	1.73
210287_s_at	FLT1	3.5	4.79	1.63
228782_at	SCGB3A2	3.5	4.37	1.4
202619_s_at	PLOD2	3.52	5.78	2.13
234970_at	TC2N	3.52	5.33	1.92
1554524_a_at	OLFM3	3.53	4.45	1.44
1552658_a_at	NAV3	3.54	5.62	2.06
225681_at	CTHRC1	3.54	4.4	1.41
204591_at	CHL1	3.55	5.58	2.03
208606_s_at	WNT4	3.55	5.43	1.97
213479_at	NPTX2	3.57	5.87	2.16
209683_at	FAM49A	3.57	5.77	2.13
213397_x_at	213397_x_at	3.58	5.27	1.88
204823_at	NAV3	3.59	5.15	1.81
213745_at	ATRNL1	3.6	4.87	1.67
1554526_at	OLFM3	3.61	4.42	1.43
208358_s_at	UGT8	3.62	4.8	1.63
235570_at	RBMS3	3.62	4.29	1.35
203323_at	CAV2	3.63	5.03	1.75
225173_at	ARHGAP18	3.63	5.04	1.75
1564413_at	FLJ36116	3.63	4.24	1.32
230623_x_at	USP28	3.64	5.86	2.16
218700_s_at	RAB7L1	3.67	6.09	2.25
206653_at	POLR3G	3.67	4.2	1.3
230861_at	DKFZP434L187	3.7	5.44	1.97
217763_s_at	RAB31	3.71	4.85	1.66
226751_at	CNRIP1	3.72	5.56	2.03
203786_s_at	TPD52L1	3.72	4.76	1.61
244170_at	RAB3C	3.72	4.32	1.37
204595_s_at	STC1	3.73	5.62	2.06
206907_at	TNFSF9	3.73	4.65	1.54
201427_s_at	SEPP1	3.75	5.5	2
238063_at	TMEM154	3.75	4.89	1.68
213456_at	SOSTDC1	3.77	5.67	2.08
1557369_a_at	LINC00698	3.8	5.32	1.91
220736_at	SLC19A3	3.8	4.93	1.7
212538_at	DOCK9	3.83	5.58	2.03
211671_s_at	NR3C1	3.83	5.35	1.93
229218_at	COL1A2	3.83	5.13	1.8
205668_at	LY75	3.87	5.89	2.18
214636_at	CALCB	3.87	5.76	2.13
212865_s_at	COL14A1	3.88	6.04	2.22
221916_at	NEFL	3.89	5.82	2.16
226225_at	MCC	3.9	4.67	1.56
202720_at	TES	3.91	5.44	1.97
227177_at	CORO2A	3.91	4.47	1.45
220030_at	STYK1	3.93	4.49	1.45
221805_at	NEFL	3.94	6.28	2.33
1556629_a_at	SNAP25	3.96	4.49	1.45
214811_at	RIMBP2	4	5.58	2.03
242532_at	242532_at	4.01	5.02	1.74
225809_at	PARM1	4.03	4.49	1.45
1556638_at	PAX7	4.05	6.35	2.33
228598_at	DPP10	4.05	6.28	2.33
219932_at	SLC27A6	4.05	5.32	1.91
215321_at	RUNDC3B	4.05	4.45	1.44
205286_at	TFAP2C	4.1	5.18	1.83
201438_at	COL6A3	4.1	4.42	1.43
204471_at	GAP43	4.11	5.13	1.8
232176_at	SLITRK6	4.12	6.26	2.33
1555878_at	RPS24	4.12	4.83	1.65
206309_at	LECT1	4.14	6.11	2.25
209211_at	KLF5	4.15	5.76	2.13
206456_at	GABRA5	4.16	5.82	2.16
1552486_s_at	LACTB	4.16	5.77	2.13
212510_at	GPD1L	4.17	5.92	2.18
222747_s_at	SCML1	4.18	6.24	2.32
222891_s_at	BCL11A	4.21	6.37	2.33
221801_x_at	NEFL	4.23	5.23	1.86
237911_at	237911_at	4.23	4.38	1.4
222033_s_at	FLT1	4.24	6.26	2.33
226913_s_at	SOX8	4.24	6.4	2.33
226636_at	PLD1	4.24	5.76	2.13
204364_s_at	REEP1	4.27	5.03	1.75
235518_at	SLC8A1	4.27	4.78	1.62
200872_at	S100A10	4.27	4.43	1.43
218858_at	DEPTOR	4.29	5.83	2.16
213601_at	213601_at	4.32	6.09	2.25
235736_at	SMKR1	4.33	4.99	1.73
201131_s_at	CDH1	4.33	4.76	1.61
228750_at	228750_at	4.34	5.67	2.08
213373_s_at	CASP8	4.35	6.02	2.22
204597_x_at	STC1	4.36	5.35	1.93
200878_at	EPAS1	4.36	4.99	1.73
213943_at	TWIST1	4.36	4.64	1.54
209406_at	BAG2	4.38	5.84	2.16
209631_s_at	GPR37	4.39	6.16	2.28
222108_at	AMIGO2	4.39	5.94	2.19
214111_at	OPCML	4.4	5.72	2.1
216321_s_at	NR3C1	4.4	4.78	1.62
202856_s_at	SLC16A3	4.4	4.59	1.51
225171_at	ARHGAP18	4.41	5.24	1.86
213802_at	PRSS12	4.42	5.82	2.16
227399_at	VGLL3	4.42	4.73	1.59
227612_at	ELAVL3	4.44	6.39	2.33
218793_s_at	SCML1	4.45	6.47	2.35
209604_s_at	GATA3	4.47	6.05	2.23
210319_x_at	MSX2	4.48	5.82	2.16
209840_s_at	LRRN3	4.48	4.88	1.67
228080_at	LAYN	4.51	6.18	2.29
204518_s_at	PPIC	4.51	5.47	1.98
239975_at	HLA-DPB2	4.51	4.62	1.52
239572_at	GJA3	4.53	6.28	2.33
209841_s_at	LRRN3	4.53	4.33	1.38
209921_at	SLC7A11	4.55	5.55	2.03
229963_at	BEX5	4.56	5.93	2.19
203543_s_at	KLF9	4.59	6.45	2.35
213503_x_at	ANXA2	4.59	5.57	2.03
209803_s_at	PHLDA2	4.61	5.97	2.2
1554547_at	FAM13C	4.61	5.84	2.16
219064_at	ITIH5	4.63	5.94	2.19
240112_at	240112_at	4.63	5.9	2.18
218656_s_at	LHFP	4.64	5.33	1.92
210427_x_at	ANXA2	4.64	5.28	1.89
210372_s_at	TPD52L1	4.64	4.81	1.63
230303_at	SYNPR	4.65	6.59	2.39
211470_s_at	SULT1C2	4.67	6.43	2.35
206332_s_at	IFI16	4.67	5.04	1.75
201590_x_at	ANXA2	4.68	5.21	1.85
206542_s_at	SMARCA2	4.71	5.55	2.03
230423_at	230423_at	4.72	6.44	2.35
206280_at	CDH18	4.73	4.97	1.72
235976_at	SLITRK6	4.73	4.81	1.64
225060_at	LRP11	4.77	6.23	2.32
209267_s_at	SLC39A8	4.81	6.56	2.39
230372_at	HAS2	4.81	5.91	2.18
217678_at	SLC7A11	4.82	5.48	1.99
209200_at	MEF2C	4.82	4.52	1.47
204115_at	GNG11	4.89	6.05	2.23
241703_at	RUNDC3B	4.89	5.7	2.1
207558_s_at	PITX2	4.9	6.26	2.33
222802_at	EDN1	4.91	6.56	2.39
226448_at	226448_at	4.91	6.17	2.28
1556329_a_at	1556329_a_at	4.93	6.37	2.33
209966_x_at	ESRRG	4.94	6	2.21
223282_at	TSHZ1	4.95	6.57	2.39
230836_at	ST8SIA4	4.96	4.85	1.66
203397_s_at	GALNT3	4.97	5.29	1.9
232720_at	LINGO2	4.99	6.36	2.33
228293_at	DEPDC7	5	6.43	2.35
223734_at	MGARP	5	5.2	1.84
236045_x_at	236045_x_at	5.01	4.28	1.35
232481_s_at	SLITRK6	5.04	5.83	2.16
1552678_a_at	USP28	5.05	4.53	1.48
237375_at	237375_at	5.06	5.89	2.18
206701_x_at	EDNRB	5.06	5.65	2.08
208966_x_at	IFI16	5.08	4.47	1.45
218469_at	GREM1	5.1	4.66	1.54
209480_at	HLA-DQB1	5.12	6.06	2.23
209755_at	NMNAT2	5.14	5.06	1.76
222446_s_at	BACE2	5.15	6.25	2.33
219869_s_at	SLC39A8	5.16	6.33	2.33
203789_s_at	SEMA3C	5.22	5.44	1.97
220038_at	220038_at	5.24	4.6	1.52
230746_s_at	230746_s_at	5.3	6.44	2.35
227627_at	227627_at	5.32	6.19	2.29
204646_at	DPYD	5.33	5.39	1.95
209199_s_at	MEF2C	5.37	4.35	1.39
229580_at	229580_at	5.41	4.55	1.49
201005_at	CD9	5.45	6.65	2.4
227297_at	ITGA9	5.46	6.3	2.33
227856_at	C4orf32	5.46	6.36	2.33
238447_at	RBMS3	5.46	4.26	1.33
212188_at	KCTD12	5.53	5	1.74
206941_x_at	SEMA3E	5.54	4.98	1.73
212681_at	EPB41L3	5.55	6.83	2.41
205342_s_at	SULT1C2	5.57	6.77	2.41
205625_s_at	CALB1	5.69	5.57	2.03
231166_at	GPR155	5.69	5.43	1.97
223557_s_at	TMEFF2	5.69	4.85	1.66
209469_at	GPM6A	5.76	7	2.41
217707_x_at	SMARCA2	5.78	6.15	2.28
228956_at	UGT8	5.8	5.48	1.99
203799_at	203799_at	5.83	5.91	2.18
232116_at	GRHL3	5.89	4.84	1.65
205923_at	RELN	5.94	5.42	1.96
206710_s_at	EPB41L3	5.98	6.14	2.27
206286_s_at	206286_s_at	6.06	4.96	1.72
208965_s_at	IFI16	6.11	4.97	1.72
211776_s_at	EPB41L3	6.13	6.35	2.33
230765_at	KIAA1239	6.28	5.71	2.1
213107_at	TNIK	6.38	6.9	2.41
206432_at	HAS2	6.39	6.9	2.41
205626_s_at	CALB1	6.4	6.02	2.22
229498_at	MBNL3	6.51	5.69	2.09
204271_s_at	EDNRB	6.52	5.98	2.2
206239_s_at	SPINK1	6.59	5.7	2.1
238877_at	EYA4	6.59	4.8	1.63
206310_at	SPINK2	6.61	6.67	2.4
239911_at	ONECUT2	6.64	6.85	2.41
205113_at	NEFM	6.72	5.66	2.08
204517_at	PPIC	6.79	7.11	2.45
202436_s_at	CYP1B1	6.92	4.72	1.59
212614_at	ARID5B	6.96	7.06	2.44
219737_s_at	PCDH9	6.96	6.02	2.22
226302_at	ATP8B1	6.96	4.83	1.65
213109_at	TNIK	6.99	6.43	2.35
209875_s_at	SPP1	7.1	4.95	1.72
228796_at	CPNE4	7.17	6.52	2.36
228964_at	PRDM1	7.21	6.6	2.39
219179_at	DACT1	7.23	7.36	2.56
209160_at	AKR1C3	7.25	5.82	2.16
227209_at	CNTN1	7.28	6.7	2.4
1553613_s_at	FOXC1	7.41	4.96	1.72
212543_at	AIM1	7.44	6.86	2.41
204273_at	EDNRB	7.58	6.63	2.39
218764_at	PRKCH	7.74	5.24	1.87
226498_at	FLT1	7.77	5.73	2.11
223044_at	SLC40A1	7.93	5.13	1.8
240055_at	240055_at	8.18	5.52	2.01
226497_s_at	FLT1	8.3	6.02	2.22
202437_s_at	CYP1B1	8.41	4.24	1.32
241986_at	BMPER	8.43	5.45	1.97
231930_at	231930_at	8.46	6.25	2.33
209470_s_at	GPM6A	8.5	7.28	2.54
216259_at	LOC100506699	8.62	5.08	1.77
227202_at	CNTN1	8.74	7.51	2.62
209687_at	CXCL12	9.07	7.14	2.46
228716_at	THRB	9.08	5.9	2.18
201963_at	ACSL1	9.11	7.41	2.57
242871_at	PAQR5	9.27	6.88	2.41
205524_s_at	HAPLN1	9.29	5.79	2.14
210145_at	PLA2G4A	9.45	7.74	2.74
238919_at	238919_at	9.57	6.11	2.25
208096_s_at	COL21A1	9.63	4.71	1.58
211828_s_at	TNIK	9.67	5.73	2.11
205431_s_at	BMP5	9.78	6.74	2.41
1553394_a_at	TFAP2B	10.01	5.6	2.04
202508_s_at	SNAP25	10.09	5.95	2.2
238914_at	DCC	10.19	6.7	2.4
230895_at	HAPLN1	10.26	6.78	2.41
228335_at	CLDN11	10.34	5.78	2.13
232054_at	PCDH20	10.36	6.07	2.24
212192_at	KCTD12	10.59	6.69	2.4
224833_at	ETS1	11.1	5.73	2.11
1559280_a_at	LOC100506013	11.15	6.8	2.41
228635_at	PCDH10	11.48	7.7	2.74
220184_at	NANOG	11.88	5.7	2.1
242344_at	GABRB2	12.22	7.96	2.74
226281_at	DNER	12.82	6.57	2.39
209723_at	SERPINB9	13.12	5.76	2.13
213139_at	SNAI2	14.13	6.15	2.28
214451_at	TFAP2B	14.29	6.26	2.33
241612_at	FOXD3	14.71	7.75	2.74
205430_at	BMP5	15.1	7.8	2.74
241550_at	DPPA5	15.1	6.76	2.41
228875_at	FAM162B	16.2	6.56	2.39
230204_at	HAPLN1	17.9	5.95	2.2
204653_at	TFAP2A	18.19	8.42	2.74
243610_at	C9orf135	19.54	8.03	2.74
205523_at	HAPLN1	20.37	5.55	2.03
239206_at	CR1L	27.54	6.85	2.41
239205_s_at	239205_s_at	48.02	7.26	2.54

## Sheet: 800
800 µM VPA
ID	symbol	fold change	-log(p-value)	-log(p-value) BY-adjusted
210302_s_at	MAB21L2	0.02	8.43	4.25
238878_at	ARX	0.03	9.23	4.38
1554012_at	RSPO2	0.03	8.86	4.35
242193_at	LOC100130155	0.04	8.67	4.28
219197_s_at	SCUBE2	0.04	8.18	4.13
221086_s_at	FEZF2	0.04	7.55	3.92
238661_at	LOC100130155	0.05	8.67	4.28
222900_at	NRIP3	0.05	7.94	4.07
219557_s_at	NRIP3	0.05	7.57	3.92
233972_s_at	FEZF2	0.05	7.5	3.89
243929_at	243929_at	0.05	5.8	2.86
235795_at	PAX6	0.06	8.06	4.1
230493_at	SHISA2	0.07	8.29	4.15
228658_at	MIAT	0.07	7.78	4.02
205646_s_at	PAX6	0.07	7.22	3.74
221950_at	EMX2	0.07	5.44	2.62
229085_at	LRRC3B	0.08	8.62	4.28
237322_at	MIAT	0.09	7.84	4.04
1555800_at	ZNF385B	0.09	7.65	3.96
1555801_s_at	ZNF385B	0.09	7.25	3.76
218870_at	ARHGAP15	0.09	7.15	3.69
220087_at	BCMO1	0.09	7.1	3.66
204424_s_at	LMO3	0.09	6.78	3.46
1556378_a_at	LOC440896	0.09	5.54	2.69
237435_at	237435_at	0.1	8.37	4.2
1554314_at	C6orf141	0.1	8.11	4.1
210303_at	MAB21L2	0.1	7.98	4.09
242054_s_at	SIX3	0.1	7.31	3.81
227168_at	MIAT	0.1	7.13	3.69
1553202_at	STOX1	0.12	7.76	4.02
231731_at	OTX2	0.12	6.89	3.53
221029_s_at	WNT5B	0.12	6.83	3.5
233327_at	UBE3D	0.12	6.58	3.33
1552575_a_at	C6orf141	0.13	7.61	3.95
239903_at	TPBG	0.13	7.39	3.86
242128_at	OTX2	0.13	6.87	3.52
243672_at	SALL3	0.13	6.86	3.52
1558388_a_at	UG0898H09	0.13	6.49	3.28
229019_at	ZNF385B	0.14	7.83	4.04
230045_at	CNTN2	0.14	7.19	3.72
239230_at	HES5	0.14	6.63	3.36
1553447_at	AGBL1	0.14	6.57	3.33
1552521_a_at	TMEM74	0.15	7.8	4.02
206588_at	DAZL	0.15	7.02	3.6
230785_at	230785_at	0.15	6.07	3.02
229435_at	GLIS3	0.15	5.9	2.92
210493_s_at	MFAP3L	0.16	6.31	3.17
238755_at	RASSF10	0.16	5.4	2.6
222325_at	222325_at	0.16	4.78	2.2
1552520_at	TMEM74	0.17	6.86	3.52
220519_s_at	LIM2	0.17	6.74	3.44
213913_s_at	TBC1D30	0.17	6.61	3.35
202219_at	SLC6A8	0.17	6.44	3.26
237449_at	SP8	0.17	5.67	2.78
1561969_at	ZPLD1	0.18	7.02	3.6
229378_at	STOX1	0.18	6.57	3.33
232847_at	SALL3	0.18	6.47	3.27
235004_at	RBM24	0.18	6.16	3.07
244061_at	244061_at	0.18	4.97	2.33
230258_at	GLIS3	0.19	7.05	3.63
231898_x_at	SOX2-OT	0.19	6.28	3.16
236214_at	FAM71F1	0.19	5.85	2.89
239556_at	LOC645513	0.19	5.57	2.71
239280_at	239280_at	0.19	5.5	2.66
243193_at	243193_at	0.19	4.81	2.22
224242_at	GALP	0.2	7.15	3.69
213912_at	TBC1D30	0.2	6.67	3.39
229441_at	PRSS23	0.2	6.65	3.37
232826_at	232826_at	0.2	6.19	3.09
233753_at	SCAF4	0.2	6.04	3
231800_s_at	DMRT3	0.2	5.43	2.62
237472_at	SOX1	0.21	7.17	3.71
230889_at	LOC645321	0.21	6.98	3.57
209560_s_at	DLK1	0.21	6.79	3.47
207443_at	NR2E1	0.21	6.77	3.45
1570335_at	1570335_at	0.21	6.58	3.33
1553411_s_at	SALL3	0.21	6.13	3.06
237305_at	237305_at	0.21	4.95	2.32
1562828_at	1562828_at	0.21	3.93	1.62
230147_at	F2RL2	0.22	6.37	3.21
238625_at	C1orf168	0.22	6.25	3.14
226279_at	PRSS23	0.22	5.92	2.93
1558387_at	UG0898H09	0.22	5.12	2.43
221245_s_at	FZD5	0.23	6.71	3.42
208345_s_at	POU3F1	0.23	6.58	3.33
206157_at	PTX3	0.23	6.52	3.3
237885_at	SOX21-AS1	0.23	6.44	3.26
212976_at	LRRC8B	0.23	6.3	3.17
229782_at	RMST	0.23	6.3	3.17
212427_at	KIAA0368	0.23	6.2	3.1
224774_s_at	NAV1	0.24	6.37	3.21
243416_at	243416_at	0.24	5.52	2.68
232531_at	EMX2OS	0.24	5.42	2.61
232424_at	PRDM16	0.24	5.34	2.56
205699_at	MAP2K6	0.24	5.19	2.47
211341_at	POU4F1	0.24	3.78	1.52
223122_s_at	SFRP2	0.25	6.33	3.18
204663_at	ME3	0.25	6.28	3.16
205442_at	MFAP3L	0.25	6.13	3.06
202458_at	PRSS23	0.25	6.12	3.05
203476_at	TPBG	0.25	6.04	3
244045_at	244045_at	0.25	5.87	2.89
233977_at	GREB1L	0.25	5.67	2.78
1557945_at	TCTE3	0.25	5.18	2.46
231466_at	FAM71F1	0.25	5.09	2.4
244156_at	244156_at	0.26	6.53	3.3
242007_at	242007_at	0.26	6.41	3.23
244116_at	244116_at	0.26	6.11	3.04
214774_x_at	TOX3	0.26	5.87	2.89
243996_at	243996_at	0.26	5.63	2.75
213353_at	ABCA5	0.26	5.4	2.6
243243_at	GPC3	0.26	5.39	2.59
243691_at	243691_at	0.26	4.6	2.08
243390_at	243390_at	0.26	4.4	1.94
235593_at	ZEB2	0.26	3.66	1.44
238098_at	238098_at	0.27	6.62	3.36
206209_s_at	CA4	0.27	6.21	3.11
223121_s_at	SFRP2	0.27	6.19	3.09
215108_x_at	TOX3	0.27	6.1	3.04
205659_at	HDAC9	0.27	6.08	3.03
243332_at	243332_at	0.27	6.06	3.02
231899_at	ZC3H12C	0.27	6.03	3
212805_at	PRUNE2	0.27	5.82	2.87
241962_at	241962_at	0.27	5.74	2.82
215483_at	AKAP9	0.27	5.24	2.51
212806_at	PRUNE2	0.27	4.77	2.2
220777_at	KIF13A	0.27	4.23	1.83
217546_at	MT1M	0.27	4.03	1.69
229569_at	229569_at	0.28	6.51	3.3
213010_at	PRKCDBP	0.28	6.51	3.29
230198_at	230198_at	0.28	6.43	3.25
223468_s_at	RGMA	0.28	6.33	3.18
1564383_s_at	FLJ35934	0.28	6.29	3.17
214633_at	SOX3	0.28	6.15	3.07
216623_x_at	TOX3	0.28	6.01	2.98
224772_at	NAV1	0.28	5.61	2.73
1569241_a_at	ZNF93	0.28	5.24	2.5
1556257_at	LOC645513	0.28	5.09	2.41
230776_at	RNF157-AS1	0.28	4.91	2.29
232453_at	232453_at	0.28	4.32	1.89
1561341_at	1561341_at	0.28	4.08	1.72
208215_x_at	DRD4	0.29	6.36	3.21
1561101_at	JAKMIP2-AS1	0.29	6.31	3.17
207357_s_at	GALNT10	0.29	6.21	3.11
228081_at	CCNG2	0.29	6.2	3.1
229302_at	TMEM178A	0.29	6.13	3.06
206306_at	RYR3	0.29	6.06	3.02
202708_s_at	HIST2H2BE	0.29	5.85	2.89
206634_at	SIX3	0.29	5.73	2.82
224215_s_at	DLL1	0.29	5.62	2.74
1570507_at	SCAF11	0.29	3.73	1.49
203441_s_at	CDH2	0.3	6.2	3.11
228885_at	MAMDC2	0.3	6.1	3.04
227584_at	NAV1	0.3	5.86	2.89
213843_x_at	SLC6A8	0.3	5.79	2.85
1560652_at	1560652_at	0.3	5.74	2.82
233202_at	CNTNAP3	0.3	5.68	2.78
220663_at	IL1RAPL1	0.3	5.5	2.66
230773_at	ZNF385D	0.3	5.46	2.64
1565595_at	1565595_at	0.3	5.44	2.62
210854_x_at	SLC6A8	0.3	5.14	2.44
202766_s_at	FBN1	0.3	4.92	2.29
239545_at	239545_at	0.3	4.42	1.95
1565975_at	1565975_at	0.3	4.11	1.75
240545_at	LOC286382	0.3	3.82	1.55
1561895_at	1561895_at	0.3	3.48	1.31
203798_s_at	VSNL1	0.31	6.21	3.11
204602_at	DKK1	0.31	6.21	3.11
203829_at	ELP4	0.31	6.18	3.09
228017_s_at	NKAIN4	0.31	6.07	3.02
206718_at	LMO1	0.31	5.9	2.91
204014_at	DUSP4	0.31	4.88	2.27
1562848_at	IST1	0.31	4.87	2.26
226665_at	AHSA2	0.31	4.67	2.13
230809_at	230809_at	0.31	4.67	2.12
228387_at	LOC100996511	0.31	4.45	1.97
236059_at	LOC100130428	0.31	4.32	1.89
1553349_at	ARID2	0.31	4.23	1.83
230863_at	LRP2	0.31	3.99	1.66
1559529_at	PTK2	0.31	3.97	1.65
235456_at	235456_at	0.32	6.25	3.14
226847_at	FST	0.32	6.1	3.04
203440_at	CDH2	0.32	6.04	3
202283_at	SERPINF1	0.32	5.95	2.95
1562633_at	RMST	0.32	5.77	2.84
238501_at	238501_at	0.32	5.72	2.81
206843_at	CRYBA4	0.32	5.71	2.8
238318_at	238318_at	0.32	5.62	2.74
210962_s_at	AKAP9	0.32	5.6	2.72
225627_s_at	CACHD1	0.32	5.52	2.67
229661_at	SALL4	0.32	5.49	2.66
222058_at	RNF130	0.32	5.38	2.58
240259_at	240259_at	0.32	5.22	2.49
220436_at	LOC441402	0.32	5.15	2.44
214058_at	MYCL1	0.32	5	2.35
227361_at	HS3ST3B1	0.32	4.79	2.2
242239_at	ARL5B-AS1	0.32	4.78	2.2
238785_at	238785_at	0.32	4.6	2.08
230928_at	230928_at	0.33	6.15	3.07
236917_at	LRRC34	0.33	6.1	3.04
203845_at	KAT2B	0.33	6.08	3.03
227610_at	TSPAN11	0.33	5.9	2.91
224773_at	NAV1	0.33	5.87	2.89
226384_at	PPAPDC1B	0.33	5.82	2.87
1563975_at	RNF130	0.33	5.81	2.86
204914_s_at	SOX11	0.33	5.8	2.86
1557066_at	LUC7L	0.33	5.74	2.82
226677_at	ZNF521	0.33	5.68	2.78
236501_at	236501_at	0.33	5.67	2.78
228018_at	NKAIN4	0.33	5.59	2.72
228792_at	228792_at	0.33	5.44	2.62
210492_at	MFAP3L	0.33	5.38	2.59
236202_at	236202_at	0.33	5.35	2.57
244133_at	USP49	0.33	5.24	2.5
1557667_at	1557667_at	0.33	5.19	2.47
230076_at	PITPNM3	0.33	5.14	2.44
235217_at	LOC100216546	0.33	5	2.35
229351_at	229351_at	0.33	4.99	2.34
224508_at	MGC12916	0.33	4.76	2.19
230148_at	AHSA2	0.33	4.63	2.1
209618_at	CTNND2	0.33	4.59	2.07
238635_at	C5orf28	0.33	4.28	1.86
232606_at	ANK2	0.33	3.9	1.6
1561195_at	1561195_at	0.33	3.63	1.42
1552296_at	BEST4	0.34	6.08	3.03
1552811_at	WFIKKN1	0.34	6.03	3
229672_at	UQCC	0.34	6.03	3
215071_s_at	HIST1H2AC	0.34	5.94	2.94
206731_at	CNKSR2	0.34	5.92	2.93
213241_at	PLXNC1	0.34	5.89	2.91
242253_at	PPP5D1	0.34	5.86	2.89
227449_at	EPHA4	0.34	5.8	2.86
224507_s_at	MGC12916	0.34	5.79	2.85
241972_at	ZNF674-AS1	0.34	5.78	2.85
229452_at	TMEM88	0.34	5.77	2.84
204153_s_at	MFNG	0.34	5.73	2.81
232989_s_at	CCDC136	0.34	5.72	2.81
202037_s_at	SFRP1	0.34	5.66	2.77
229374_at	EPHA4	0.34	5.48	2.65
204948_s_at	FST	0.34	5.39	2.59
210381_s_at	CCKBR	0.34	5.36	2.58
238129_s_at	FZD2	0.34	5.37	2.58
227195_at	ZNF503	0.34	5.28	2.53
236297_at	236297_at	0.34	5.28	2.53
203868_s_at	VCAM1	0.34	5.2	2.48
209220_at	GPC3	0.34	5.2	2.48
205041_s_at	205041_s_at	0.34	5.17	2.46
236253_at	ZNF546	0.34	5.14	2.44
204455_at	204455_at	0.34	5.13	2.43
228455_at	228455_at	0.34	4.92	2.29
1563899_at	LCTL	0.34	4.86	2.25
243483_at	TRPM8	0.34	4.33	1.9
223915_at	BCOR	0.34	4.28	1.86
219820_at	SLC6A16	0.34	4.06	1.71
236832_at	ADCY10P1	0.34	4.04	1.7
1569940_at	SLC6A16	0.34	4.02	1.68
233832_at	233832_at	0.34	4	1.67
205710_at	LRP2	0.34	3.77	1.51
235555_at	235555_at	0.34	3.74	1.49
232396_at	232396_at	0.34	3.63	1.42
233257_at	233257_at	0.34	3.6	1.4
1570388_a_at	LOC440896	0.34	3.54	1.35
223472_at	WHSC1	0.35	5.99	2.97
241853_at	241853_at	0.35	5.99	2.97
206114_at	EPHA4	0.35	5.85	2.89
235422_at	235422_at	0.35	5.83	2.88
213197_at	ASTN1	0.35	5.78	2.85
211427_s_at	KCNJ13	0.35	5.75	2.83
213721_at	SOX2	0.35	5.68	2.78
239761_at	GCNT1	0.35	5.63	2.75
202035_s_at	SFRP1	0.35	5.61	2.73
217028_at	CXCR4	0.35	5.57	2.71
204915_s_at	SOX11	0.35	5.48	2.65
206254_at	EGF	0.35	5.39	2.59
244271_at	244271_at	0.35	5.39	2.59
209806_at	HIST1H2BK	0.35	5.34	2.56
1552822_at	TMX3	0.35	5.32	2.55
244427_at	KIF23	0.35	5.32	2.55
230067_at	FAM124A	0.35	5.18	2.46
235500_at	HNRNPC	0.35	5.18	2.46
205206_at	KAL1	0.35	5.08	2.4
1561158_at	1561158_at	0.35	5.05	2.38
237291_at	PRORSD1P	0.35	5.04	2.37
240713_s_at	240713_s_at	0.35	5.02	2.36
213993_at	SPON1	0.35	4.93	2.29
241769_at	241769_at	0.35	4.8	2.21
206326_at	GRP	0.35	4.78	2.2
207103_at	KCND2	0.35	4.73	2.17
231449_at	231449_at	0.35	4.66	2.12
210037_s_at	NOS2	0.35	4.56	2.05
220360_at	THAP9	0.35	4.55	2.05
224771_at	NAV1	0.35	4.43	1.96
239049_at	239049_at	0.35	4.42	1.96
1555074_a_at	KCNH5	0.35	4.4	1.95
232734_at	TTC23	0.35	4.24	1.83
224770_s_at	NAV1	0.35	3.9	1.6
233180_at	233180_at	0.35	3.8	1.54
241705_at	ABCA5	0.35	3.76	1.51
1565703_at	SMAD4	0.35	3.45	1.3
1554507_at	NAALAD2	0.36	5.85	2.89
228948_at	EPHA4	0.36	5.85	2.89
202036_s_at	SFRP1	0.36	5.83	2.87
223552_at	LRRC4	0.36	5.82	2.87
236153_at	236153_at	0.36	5.82	2.87
226676_at	ZNF521	0.36	5.78	2.85
231088_at	MORF4L2-AS1	0.36	5.74	2.82
240269_at	240269_at	0.36	5.61	2.74
221901_at	KIAA1644	0.36	5.39	2.59
227524_at	FZD3	0.36	5.37	2.58
203797_at	VSNL1	0.36	5.34	2.57
1556659_at	1556659_at	0.36	5.3	2.54
236004_at	236004_at	0.36	5.29	2.53
207345_at	FST	0.36	5.26	2.52
1566152_a_at	1566152_a_at	0.36	5.11	2.42
238595_at	238595_at	0.36	5.1	2.42
233090_at	233090_at	0.36	4.8	2.21
1568983_a_at	1568983_a_at	0.36	4.79	2.2
228494_at	PPP1R9A	0.36	4.63	2.1
238455_at	238455_at	0.36	4.6	2.08
231738_at	PCDHB7	0.36	4.52	2.02
236343_at	236343_at	0.36	4.48	2
230395_at	230395_at	0.36	3.95	1.63
218541_s_at	C8orf4	0.36	3.92	1.61
232629_at	PROK2	0.36	3.82	1.55
238488_at	238488_at	0.37	5.67	2.78
1555448_at	AP5M1	0.37	5.52	2.67
210220_at	FZD2	0.37	5.52	2.67
220727_at	KCNK10	0.37	5.45	2.63
243010_at	MSI2	0.37	5.31	2.55
231230_at	KCNK10	0.37	5.26	2.51
232156_at	232156_at	0.37	5.13	2.43
211559_s_at	CCNG2	0.37	5.06	2.39
235318_at	FBN1	0.37	5.04	2.37
204671_s_at	ANKRD6	0.37	4.92	2.29
218113_at	TMEM2	0.37	4.87	2.26
229133_s_at	ZNF397	0.37	4.71	2.15
239442_at	CEP68	0.37	4.66	2.12
1561198_at	LOC100506127	0.37	4.57	2.06
232207_at	GUSBP4	0.37	4.57	2.06
242986_at	NAV1	0.37	4.34	1.91
228032_s_at	DENND1B	0.37	4.2	1.8
226096_at	FNDC5	0.38	5.65	2.76
242523_at	242523_at	0.38	5.58	2.72
217574_at	CDH8	0.38	5.51	2.67
211919_s_at	CXCR4	0.38	5.46	2.64
213283_s_at	SALL2	0.38	5.46	2.63
220231_at	PPP1R17	0.38	5.36	2.58
213145_at	FBXL14	0.38	5.26	2.52
236555_at	TRAF3IP2-AS1	0.38	5.27	2.52
244418_at	244418_at	0.38	5.27	2.52
227499_at	FZD3	0.38	5.26	2.51
230721_at	230721_at	0.38	5.21	2.49
210179_at	KCNJ13	0.38	5.19	2.47
205132_at	ACTC1	0.38	5.15	2.45
226972_s_at	CCDC136	0.38	5.16	2.45
236270_at	NFATC4	0.38	5.14	2.44
212062_at	ATP9A	0.38	5.12	2.43
213722_at	SOX2	0.38	5.1	2.42
228529_at	NAA38	0.38	5.09	2.4
235226_at	CDK19	0.38	5.04	2.37
220390_at	AGBL2	0.38	4.9	2.28
220474_at	SLC25A21	0.38	4.89	2.27
221088_s_at	PPP1R9A	0.38	4.81	2.22
1559283_a_at	CNPY1	0.38	4.75	2.18
230022_at	CLEC18A	0.38	4.66	2.12
232797_at	232797_at	0.38	4.22	1.82
237444_at	KIF13A	0.38	4.18	1.79
242292_at	FAM226B	0.38	4.14	1.77
239886_at	239886_at	0.38	4.11	1.75
208015_at	SMAD1	0.38	3.71	1.47
206424_at	CYP26A1	0.38	3.59	1.39
228392_at	ZNF302	0.38	3.56	1.37
242518_at	LOC100505648	0.38	3.55	1.36
1569930_at	1569930_at	0.38	3.46	1.3
227162_at	ZBTB26	0.39	5.57	2.71
202769_at	CCNG2	0.39	5.52	2.67
210222_s_at	RTN1	0.39	5.49	2.66
215306_at	215306_at	0.39	5.48	2.65
230519_at	FAM124A	0.39	5.48	2.65
1560906_at	1560906_at	0.39	5.43	2.62
214094_at	FUBP1	0.39	5.4	2.6
235540_at	GNRH1	0.39	5.4	2.6
214093_s_at	FUBP1	0.39	5.39	2.59
210409_at	MLLT4-AS1	0.39	5.37	2.58
244008_at	PARP8	0.39	5.35	2.57
204913_s_at	SOX11	0.39	5.33	2.56
231979_at	231979_at	0.39	5.3	2.54
204015_s_at	DUSP4	0.39	5.28	2.53
244110_at	MLL	0.39	5.23	2.49
236500_at	236500_at	0.39	5.2	2.48
243880_at	GOSR2	0.39	5.21	2.48
219696_at	DENND1B	0.39	5.09	2.4
222963_s_at	IL1RAPL1	0.39	4.91	2.28
1555318_at	HIF3A	0.39	4.84	2.24
220302_at	MAK	0.39	4.83	2.23
1569181_x_at	1569181_x_at	0.39	4.76	2.19
233309_at	233309_at	0.39	4.75	2.18
233963_at	H2BFXP	0.39	4.72	2.16
244014_x_at	244014_x_at	0.39	4.71	2.16
241834_at	241834_at	0.39	4.65	2.12
1552327_at	ARMCX4	0.39	4.63	2.1
1557828_a_at	C5orf28	0.39	4.55	2.05
215169_at	215169_at	0.39	4.56	2.05
214012_at	ERAP1	0.39	4.42	1.96
208579_x_at	208579_x_at	0.39	4.33	1.9
214409_at	RFPL3S	0.39	4.22	1.82
220576_at	PGAP1	0.39	4.09	1.73
242829_x_at	242829_x_at	0.39	3.86	1.57
242751_at	242751_at	0.39	3.77	1.51
1565830_at	1565830_at	0.39	3.65	1.43
244691_at	SETD5	0.39	3.64	1.43
230375_at	PNISR	0.39	3.47	1.31
228584_at	SGCB	0.4	5.54	2.69
239082_at	FZD3	0.4	5.54	2.69
215307_at	ZNF529	0.4	5.51	2.67
1556414_at	LINC00515	0.4	5.49	2.66
201431_s_at	DPYSL3	0.4	5.49	2.66
227059_at	GPC6	0.4	5.47	2.64
1554328_at	STXBP4	0.4	5.43	2.62
225975_at	PCDH18	0.4	5.41	2.6
1559510_at	LINC00630	0.4	5.37	2.58
228038_at	SOX2	0.4	5.37	2.58
230664_at	H2BFXP	0.4	5.32	2.55
225339_at	SPAG9	0.4	5.3	2.54
235072_s_at	KIF13A	0.4	5.31	2.54
235697_at	235697_at	0.4	5.31	2.54
243264_s_at	243264_s_at	0.4	5.22	2.49
230906_at	GALNT10	0.4	5.15	2.45
212851_at	DCUN1D4	0.4	5.04	2.37
212875_s_at	C2CD2	0.4	5.02	2.36
228788_at	YPEL1	0.4	4.96	2.32
219314_s_at	ZNF219	0.4	4.95	2.31
65472_at	C2orf68	0.4	4.93	2.3
1563614_at	MTBP	0.4	4.92	2.29
226112_at	SGCB	0.4	4.9	2.28
230821_at	ZNF148	0.4	4.88	2.27
235190_at	235190_at	0.4	4.81	2.22
244490_at	LOC100996511	0.4	4.82	2.22
232280_at	SLC25A29	0.4	4.77	2.19
223520_s_at	KIF13A	0.4	4.72	2.16
229380_at	ILDR2	0.4	4.68	2.13
232061_at	SDK2	0.4	4.65	2.11
235876_at	TMEM218	0.4	4.55	2.05
1554638_at	ZFYVE16	0.4	4.38	1.93
244383_at	244383_at	0.4	4.31	1.89
232878_at	NR2F2-AS1	0.4	4.2	1.81
1559964_at	FLJ38717	0.4	4.13	1.76
240317_at	PCDHB4	0.41	5.45	2.63
203562_at	FEZ1	0.41	5.37	2.58
230380_at	THAP2	0.41	5.35	2.57
236918_s_at	LRRC34	0.41	5.31	2.55
1556160_a_at	1556160_a_at	0.41	5.29	2.53
206136_at	FZD5	0.41	5.24	2.51
231952_at	231952_at	0.41	5.21	2.48
228407_at	SCUBE3	0.41	5.09	2.41
202765_s_at	FBN1	0.41	5.08	2.4
209883_at	GLT25D2	0.41	5.05	2.38
212468_at	SPAG9	0.41	4.99	2.34
236124_at	LOC153546	0.41	4.97	2.33
229086_at	C1orf213	0.41	4.91	2.29
233241_at	PLK1S1	0.41	4.92	2.29
239347_at	239347_at	0.41	4.9	2.28
222784_at	SMOC1	0.41	4.83	2.23
220887_at	CCDC177	0.41	4.81	2.22
228826_at	BZRAP1-AS1	0.41	4.76	2.19
241774_at	FLJ31306	0.41	4.75	2.18
243707_at	243707_at	0.41	4.71	2.16
233400_at	233400_at	0.41	4.7	2.14
1560274_at	WTAP	0.41	4.58	2.07
210006_at	ABHD14A	0.41	4.59	2.07
239951_at	239951_at	0.41	4.54	2.04
239130_at	239130_at	0.41	4.46	1.98
227412_at	PPP1R3E	0.41	4.28	1.87
206349_at	LGI1	0.41	4.26	1.85
1554743_x_at	PMS1	0.41	4.25	1.84
236251_at	236251_at	0.41	4.18	1.79
226971_at	CCDC136	0.41	4.01	1.67
1554769_at	ZNF785	0.41	3.9	1.6
235959_at	235959_at	0.41	3.89	1.59
243498_at	243498_at	0.41	3.66	1.44
240153_at	ILDR2	0.41	3.63	1.42
243092_at	PAN3-AS1	0.41	3.64	1.42
220717_at	ADAMTS20	0.41	3.54	1.36
219029_at	C5orf28	0.42	5.38	2.58
1558842_at	1558842_at	0.42	5.34	2.57
223673_at	RFX4	0.42	5.36	2.57
220987_s_at	220987_s_at	0.42	5.34	2.56
222217_s_at	SLC27A3	0.42	5.31	2.55
220495_s_at	TXNDC15	0.42	5.29	2.53
235274_at	235274_at	0.42	5.12	2.43
214393_at	RND2	0.42	5.11	2.42
220296_at	GALNT10	0.42	5.09	2.41
231061_at	231061_at	0.42	5.08	2.4
212549_at	STAT5B	0.42	5	2.35
224800_at	WDFY1	0.42	5.01	2.35
213998_s_at	DDX17	0.42	4.99	2.34
1554636_at	1554636_at	0.42	4.96	2.32
244872_at	RBBP4	0.42	4.95	2.31
210281_s_at	ZMYM2	0.42	4.94	2.3
202770_s_at	CCNG2	0.42	4.82	2.22
232998_at	TIGD4	0.42	4.78	2.2
1553764_a_at	AJUBA	0.42	4.75	2.18
236668_at	236668_at	0.42	4.64	2.11
244517_x_at	244517_x_at	0.42	4.65	2.11
225786_at	HNRNPU-AS1	0.42	4.61	2.09
227870_at	IGDCC4	0.42	4.59	2.07
235224_s_at	CAND1	0.42	4.59	2.07
224219_s_at	TRPC4	0.42	4.45	1.98
228412_at	LOC643072	0.42	4.34	1.9
235172_at	235172_at	0.42	4.33	1.9
236165_at	MSL3	0.42	4.29	1.87
242646_at	242646_at	0.42	4.27	1.85
230904_at	FSD1L	0.42	4.21	1.81
232256_s_at	LOC401321	0.42	4.08	1.73
240143_at	240143_at	0.42	3.72	1.48
240101_at	240101_at	0.42	3.62	1.42
232837_at	KIF13A	0.42	3.61	1.4
215198_s_at	CALD1	0.43	5.32	2.55
232052_at	SETD5-AS1	0.43	5.27	2.52
223162_s_at	KIAA1147	0.43	5.25	2.51
52837_at	KIAA1644	0.43	5.21	2.49
204088_at	P2RX4	0.43	5.15	2.45
1557118_a_at	INTS6-AS1	0.43	5.14	2.44
225864_at	FAM84B	0.43	5.15	2.44
213661_at	PAMR1	0.43	5.05	2.38
239682_at	239682_at	0.43	5.05	2.38
227505_at	227505_at	0.43	5.04	2.37
219342_at	CASD1	0.43	5.02	2.36
205109_s_at	ARHGEF4	0.43	4.98	2.34
239937_at	ZNF207	0.43	4.99	2.34
231953_at	BPTF	0.43	4.96	2.32
1553099_at	TIGD1	0.43	4.9	2.28
233985_x_at	PPP1R9A	0.43	4.88	2.27
236273_at	NBPF1	0.43	4.84	2.24
1554609_at	LOC100287896	0.43	4.82	2.22
230185_at	THAP9	0.43	4.81	2.22
230296_at	C16orf52	0.43	4.8	2.21
213994_s_at	SPON1	0.43	4.79	2.2
228157_at	ZNF207	0.43	4.67	2.12
233083_at	MTHFD2L	0.43	4.66	2.12
229184_at	CCNT2	0.43	4.63	2.1
226334_s_at	AHSA2	0.43	4.62	2.09
239005_at	239005_at	0.43	4.6	2.08
241627_x_at	ARHGEF40	0.43	4.57	2.06
233214_at	233214_at	0.43	4.56	2.05
236428_at	236428_at	0.43	4.55	2.05
212978_at	LRRC8B	0.43	4.53	2.04
225806_at	AJUBA	0.43	4.54	2.04
239537_at	ST8SIA2	0.43	4.51	2.02
201372_s_at	CUL3	0.43	4.5	2.01
1559067_a_at	LOC158402	0.43	4.41	1.95
243054_at	243054_at	0.43	4.34	1.91
229111_at	229111_at	0.43	4.32	1.89
236974_at	236974_at	0.43	3.97	1.65
239735_at	239735_at	0.43	3.98	1.65
1569262_x_at	UBE3D	0.43	3.91	1.6
1564676_a_at	1564676_a_at	0.43	3.85	1.57
225496_s_at	SYTL2	0.43	3.74	1.49
242983_at	242983_at	0.43	3.69	1.46
240859_at	ZFYVE16	0.43	3.63	1.42
227943_at	227943_at	0.43	3.55	1.36
235927_at	XPO1	0.43	3.48	1.32
242120_at	242120_at	0.43	3.48	1.32
224804_s_at	FAM219B	0.44	5.2	2.48
238252_at	238252_at	0.44	5.2	2.48
229706_at	TCERG1	0.44	5.18	2.46
205120_s_at	SGCB	0.44	5.15	2.45
237859_at	237859_at	0.44	5.16	2.45
204037_at	LPAR1	0.44	5.14	2.44
223717_s_at	ACRBP	0.44	5.13	2.43
216078_at	216078_at	0.44	5.08	2.4
230589_at	TRAF3IP2-AS1	0.44	5	2.35
238114_at	PCMTD1	0.44	4.97	2.33
1557383_a_at	1557383_a_at	0.44	4.92	2.29
1560739_a_at	1560739_a_at	0.44	4.92	2.29
228465_at	228465_at	0.44	4.88	2.27
227081_at	DNALI1	0.44	4.87	2.26
236321_at	FAM200B	0.44	4.87	2.26
1557065_at	YLPM1	0.44	4.79	2.2
219302_s_at	CNTNAP2	0.44	4.77	2.19
1557630_s_at	1557630_s_at	0.44	4.75	2.18
238115_at	DNAJC18	0.44	4.73	2.17
238902_at	238902_at	0.44	4.73	2.17
202686_s_at	AXL	0.44	4.69	2.14
214250_at	NUMA1	0.44	4.7	2.14
223569_at	PPAPDC1B	0.44	4.69	2.14
1567997_x_at	1567997_x_at	0.44	4.68	2.13
235831_at	235831_at	0.44	4.6	2.08
204672_s_at	ANKRD6	0.44	4.58	2.07
243745_at	243745_at	0.44	4.51	2.02
214102_at	214102_at	0.44	4.46	1.98
229866_at	STK32A	0.44	4.46	1.98
212177_at	PNISR	0.44	4.44	1.97
226034_at	DUSP4	0.44	4.37	1.93
239884_at	CADPS	0.44	4.37	1.92
233068_at	233068_at	0.44	4.32	1.89
209617_s_at	CTNND2	0.44	4.3	1.88
231252_at	KANSL1L	0.44	4.29	1.87
236105_at	ZBTB10	0.44	4.26	1.85
235635_at	ARHGAP5	0.44	4.25	1.84
1561319_at	OTX2-AS1	0.44	4.23	1.83
211267_at	HESX1	0.44	4.21	1.81
228349_at	KIAA1958	0.44	4.11	1.75
206636_at	RASA2	0.44	4.08	1.72
215599_at	215599_at	0.44	4.04	1.7
244389_at	TLK1	0.44	4.04	1.7
213575_at	TRA2A	0.44	3.89	1.59
226316_at	RBM26	0.44	3.86	1.57
235271_s_at	ZNF397	0.44	3.82	1.55
234105_at	234105_at	0.44	3.75	1.5
220546_at	MLL	0.44	3.72	1.48
243009_at	243009_at	0.44	3.66	1.44
203384_s_at	GOLGA1	0.44	3.59	1.39
244222_at	244222_at	0.44	3.57	1.38
226412_at	PNISR	0.44	3.51	1.33
217671_at	DSERG1	0.44	3.46	1.3
230668_at	NKAIN4	0.45	5.17	2.46
204121_at	GADD45G	0.45	5.14	2.44
210694_s_at	MID1	0.45	5.14	2.44
1556033_at	1556033_at	0.45	5.13	2.43
212855_at	DCUN1D4	0.45	5.12	2.43
226392_at	RASA2	0.45	5.12	2.43
225977_at	PCDH18	0.45	5.09	2.4
238951_at	238951_at	0.45	5.06	2.38
203485_at	RTN1	0.45	5	2.35
235846_at	235846_at	0.45	5	2.35
242470_at	EID2B	0.45	5	2.35
238633_at	EPC1	0.45	4.98	2.33
227351_at	C16orf52	0.45	4.93	2.3
242807_at	FSD1L	0.45	4.94	2.3
201825_s_at	SCCPDH	0.45	4.9	2.28
238787_at	DENND1B	0.45	4.9	2.28
209201_x_at	CXCR4	0.45	4.88	2.27
201826_s_at	SCCPDH	0.45	4.86	2.25
241017_at	241017_at	0.45	4.8	2.21
205505_at	GCNT1	0.45	4.78	2.2
1558474_at	1558474_at	0.45	4.77	2.19
212853_at	DCUN1D4	0.45	4.75	2.18
237161_at	LOC100506059	0.45	4.74	2.17
1554043_a_at	1554043_a_at	0.45	4.66	2.12
210203_at	CNOT4	0.45	4.66	2.12
209436_at	SPON1	0.45	4.63	2.1
1554108_at	1554108_at	0.45	4.6	2.08
224765_at	MSL1	0.45	4.51	2.02
224763_at	224763_at	0.45	4.49	2.01
223985_at	FSD1L	0.45	4.44	1.97
242586_at	FSD1L	0.45	4.44	1.97
1559534_at	LOC100996419	0.45	4.39	1.94
228216_at	228216_at	0.45	4.4	1.94
214500_at	H2AFY	0.45	4.37	1.92
215012_at	ZNF451	0.45	4.32	1.89
235315_at	TSC22D1	0.45	4.3	1.88
239863_at	239863_at	0.45	4.31	1.88
238081_at	WDFY3-AS2	0.45	4.29	1.87
233139_at	233139_at	0.45	4.26	1.85
228941_at	ALG10B	0.45	4.23	1.83
232911_at	ZFP14	0.45	4.22	1.82
204310_s_at	NPR2	0.45	4.14	1.77
1556911_at	1556911_at	0.45	4.09	1.73
1553292_s_at	SGK494	0.45	4.06	1.71
232794_at	LOC153682	0.45	3.97	1.65
241996_at	RUFY2	0.45	3.95	1.64
236314_at	EPM2AIP1	0.45	3.95	1.63
1555568_at	GUSBP2	0.45	3.89	1.6
239169_at	RDM1	0.45	3.82	1.55
236911_at	RIMKLB	0.45	3.75	1.5
230537_at	230537_at	0.45	3.72	1.48
1557166_at	PDCD4	0.45	3.7	1.46
1558854_a_at	1558854_a_at	0.45	3.61	1.41
236292_at	RNF130	0.45	3.6	1.4
236924_at	236924_at	0.45	3.55	1.36
217164_at	217164_at	0.45	3.51	1.33
236909_at	CCDC173	0.46	5.06	2.39
222350_at	222350_at	0.46	5.05	2.38
242277_at	242277_at	0.46	5.02	2.36
231325_at	UNC5D	0.46	4.99	2.34
229571_at	229571_at	0.46	4.96	2.32
241376_at	241376_at	0.46	4.95	2.32
242201_at	PMS2P5	0.46	4.95	2.32
230764_at	230764_at	0.46	4.95	2.31
1558778_s_at	MKL2	0.46	4.94	2.3
219683_at	FZD3	0.46	4.84	2.24
1562957_at	1562957_at	0.46	4.81	2.22
219543_at	PBLD	0.46	4.82	2.22
227504_s_at	227504_s_at	0.46	4.81	2.22
218376_s_at	MICAL1	0.46	4.78	2.2
222759_at	SUV420H1	0.46	4.78	2.2
214060_at	214060_at	0.46	4.73	2.17
219464_at	CA14	0.46	4.73	2.17
238227_at	238227_at	0.46	4.65	2.11
1554479_a_at	CARD8	0.46	4.59	2.07
220817_at	TRPC4	0.46	4.58	2.07
238053_at	DHRSX	0.46	4.58	2.06
202986_at	ARNT2	0.46	4.53	2.04
1555842_at	CYTH2	0.46	4.53	2.03
1556488_s_at	MAATS1	0.46	4.52	2.03
1556964_s_at	1556964_s_at	0.46	4.51	2.02
239649_at	239649_at	0.46	4.43	1.96
221012_s_at	TRIM8	0.46	4.41	1.95
235829_at	CAHM	0.46	4.38	1.93
236032_at	236032_at	0.46	4.38	1.93
232914_s_at	SYTL2	0.46	4.36	1.92
241818_at	241818_at	0.46	4.29	1.87
242607_at	242607_at	0.46	4.28	1.86
215259_s_at	CADM4	0.46	4.2	1.8
1558922_at	1558922_at	0.46	4.1	1.74
229016_s_at	TRERF1	0.46	4.03	1.69
243049_at	243049_at	0.46	4.01	1.68
244454_at	244454_at	0.46	3.93	1.62
1559763_at	ZC3H12C	0.46	3.92	1.61
235845_at	SP5	0.46	3.91	1.6
215109_at	RC3H1	0.46	3.86	1.57
230752_at	230752_at	0.46	3.81	1.54
244020_at	244020_at	0.46	3.78	1.52
236379_at	236379_at	0.46	3.76	1.51
202136_at	ZMYND11	0.47	4.98	2.34
215812_s_at	215812_s_at	0.47	4.98	2.33
212997_s_at	TLK2	0.47	4.95	2.31
213170_at	GPX7	0.47	4.93	2.3
239024_at	ZNF148	0.47	4.92	2.29
231470_at	LOC400680	0.47	4.91	2.28
208719_s_at	DDX17	0.47	4.87	2.26
212905_at	CSTF2T	0.47	4.81	2.22
213326_at	VAMP1	0.47	4.82	2.22
242590_at	242590_at	0.47	4.82	2.22
210630_s_at	RAD52	0.47	4.78	2.2
235634_at	PURG	0.47	4.78	2.2
221880_s_at	FAM174B	0.47	4.76	2.19
237044_s_at	ZNF503-AS2	0.47	4.73	2.17
210282_at	ZMYM2	0.47	4.67	2.13
226884_at	LRRN1	0.47	4.62	2.09
219232_s_at	EGLN3	0.47	4.6	2.08
210729_at	NPY2R	0.47	4.58	2.07
1555388_s_at	SNX25	0.47	4.57	2.06
229879_at	229879_at	0.47	4.56	2.06
239699_s_at	239699_s_at	0.47	4.51	2.02
220301_at	CCDC102B	0.47	4.47	1.99
233559_s_at	WDFY1	0.47	4.47	1.99
242306_at	242306_at	0.47	4.47	1.99
230939_at	LOC100996457	0.47	4.44	1.97
212606_at	WDFY3	0.47	4.42	1.96
209726_at	CA11	0.47	4.41	1.95
228765_at	GTF2IRD2	0.47	4.4	1.94
222016_s_at	ZSCAN31	0.47	4.35	1.91
233187_s_at	233187_s_at	0.47	4.34	1.91
226934_at	CPSF6	0.47	4.33	1.9
234103_at	KCNT2	0.47	4.29	1.87
210069_at	210069_at	0.47	4.28	1.86
1556035_s_at	ZNF207	0.47	4.24	1.83
243368_at	243368_at	0.47	4.19	1.8
209395_at	CHI3L1	0.47	4.15	1.77
226846_at	PHYHD1	0.47	4.1	1.74
1559535_s_at	LOC100996419	0.47	4	1.67
223784_at	TMEM27	0.47	3.97	1.65
239050_s_at	239050_s_at	0.47	3.89	1.6
241489_at	241489_at	0.47	3.88	1.59
1560738_at	1560738_at	0.47	3.75	1.5
231848_x_at	ZNF207	0.47	3.71	1.47
236697_at	236697_at	0.47	3.67	1.44
210631_at	NF1	0.47	3.62	1.42
226419_s_at	FLJ44342	0.47	3.62	1.41
239443_at	PCDHB6	0.47	3.51	1.33
1557145_at	STK38	0.47	3.48	1.32
222819_at	CTPS2	0.48	4.9	2.28
1556187_at	ZNF555	0.48	4.88	2.27
238799_at	ATP5S	0.48	4.88	2.26
243322_at	243322_at	0.48	4.82	2.23
1557003_at	TTC23L	0.48	4.81	2.22
1569129_s_at	C3orf38	0.48	4.78	2.2
219522_at	FJX1	0.48	4.78	2.2
226588_at	CWC22	0.48	4.79	2.2
225595_at	CREBZF	0.48	4.74	2.18
221264_s_at	TARDBP	0.48	4.73	2.17
227769_at	GPR27	0.48	4.71	2.16
218638_s_at	218638_s_at	0.48	4.71	2.15
209911_x_at	HIST1H2BD	0.48	4.68	2.13
244321_at	PGAP1	0.48	4.62	2.09
1554449_at	MIER3	0.48	4.61	2.08
227575_s_at	NRDE2	0.48	4.6	2.08
232395_x_at	AGBL3	0.48	4.6	2.08
1564164_at	DENND1B	0.48	4.59	2.07
215297_at	LOC441204	0.48	4.53	2.04
203902_at	HEPH	0.48	4.45	1.98
229491_at	SLC9B2	0.48	4.46	1.98
227812_at	TNFRSF19	0.48	4.45	1.97
215592_at	215592_at	0.48	4.43	1.96
232004_at	HNRNPR	0.48	4.42	1.96
232600_at	232600_at	0.48	4.42	1.96
237803_x_at	237803_x_at	0.48	4.39	1.94
1558906_a_at	LOC100505783	0.48	4.37	1.93
212176_at	PNISR	0.48	4.37	1.92
206960_at	LPAR4	0.48	4.35	1.91
224370_s_at	CAPS2	0.48	4.32	1.89
223730_at	GPC6	0.48	4.3	1.88
230183_at	EXT1	0.48	4.27	1.86
220770_s_at	C5orf54	0.48	4.26	1.85
231262_at	231262_at	0.48	4.26	1.85
206891_at	ACTN3	0.48	4.25	1.84
209197_at	SYT11	0.48	4.24	1.84
205647_at	RAD52	0.48	4.2	1.81
227708_at	EEF1A1	0.48	4.21	1.81
209437_s_at	SPON1	0.48	4.17	1.79
228720_at	SORCS2	0.48	4.16	1.78
203080_s_at	BAZ2B	0.48	4.14	1.77
227074_at	LOC100131564	0.48	4.12	1.75
230079_at	ST7L	0.48	4	1.67
243908_at	243908_at	0.48	3.99	1.66
235124_at	LOC645212	0.48	3.96	1.64
236408_at	236408_at	0.48	3.96	1.64
212354_at	SULF1	0.48	3.92	1.61
229143_at	CNOT3	0.48	3.86	1.57
238117_at	PPOX	0.48	3.82	1.55
227448_at	ARGLU1	0.48	3.81	1.54
205143_at	NCAN	0.48	3.79	1.52
235288_at	235288_at	0.48	3.72	1.48
240445_at	240445_at	0.48	3.72	1.48
238620_at	238620_at	0.48	3.71	1.47
223843_at	SCARA3	0.48	3.7	1.46
230712_at	NBPF1	0.48	3.64	1.43
240006_at	240006_at	0.48	3.59	1.4
242968_at	242968_at	0.48	3.58	1.39
226344_at	ZMAT1	0.48	3.58	1.38
223627_at	MEX3B	0.48	3.56	1.37
235556_at	CREBRF	0.48	3.52	1.34
210843_s_at	MFAP3L	0.49	4.82	2.23
225486_at	ARID2	0.49	4.78	2.2
227837_at	227837_at	0.49	4.72	2.17
228980_at	228980_at	0.49	4.73	2.17
243112_at	LOC100996424	0.49	4.74	2.17
1557195_at	1557195_at	0.49	4.68	2.13
210070_s_at	210070_s_at	0.49	4.66	2.12
225839_at	RBM33	0.49	4.63	2.1
237856_at	RAP1GDS1	0.49	4.62	2.09
237918_at	237918_at	0.49	4.57	2.06
221878_at	C2orf68	0.49	4.55	2.05
1557363_a_at	PHIP	0.49	4.54	2.04
214121_x_at	PDLIM7	0.49	4.48	1.99
231361_at	NLGN1	0.49	4.47	1.99
225487_at	TMEM18	0.49	4.45	1.97
1558508_a_at	C1orf53	0.49	4.41	1.95
238946_at	238946_at	0.49	4.38	1.93
239278_at	239278_at	0.49	4.38	1.93
229321_s_at	229321_s_at	0.49	4.35	1.91
239014_at	CCAR1	0.49	4.28	1.86
212764_at	ZEB1	0.49	4.24	1.83
218980_at	FHOD3	0.49	4.23	1.83
223802_s_at	RBBP6	0.49	4.2	1.8
223588_at	THAP2	0.49	4.18	1.79
241590_at	241590_at	0.49	4.16	1.78
210880_s_at	EFS	0.49	4.14	1.77
237571_at	237571_at	0.49	4.14	1.77
241829_at	FAM124A	0.49	4.15	1.77
205839_s_at	BZRAP1	0.49	4.13	1.76
230293_at	MEAF6	0.49	4.11	1.75
239393_at	239393_at	0.49	4.11	1.74
243292_at	FAM132A	0.49	4.09	1.73
207234_at	RFX3	0.49	4.04	1.69
234990_at	CBX5	0.49	4.01	1.68
227921_at	LOC100507312	0.49	4	1.67
227996_at	FARP1	0.49	3.91	1.61
1559102_at	1559102_at	0.49	3.89	1.6
230477_at	PARD6G-AS1	0.49	3.89	1.59
1554099_a_at	SPIN3	0.49	3.87	1.58
222307_at	LOC282997	0.49	3.87	1.58
220818_s_at	TRPC4	0.49	3.83	1.55
215470_at	215470_at	0.49	3.82	1.54
213593_s_at	TRA2A	0.49	3.79	1.52
1556088_at	RPAIN	0.49	3.75	1.5
223161_at	KIAA1147	0.49	3.73	1.48
222306_at	222306_at	0.49	3.59	1.39
235960_at	FXR1	0.49	3.59	1.39
1560834_a_at	RMST	0.49	3.57	1.38
215554_at	GPLD1	0.49	3.55	1.37
226435_at	PAPLN	0.49	3.55	1.36
216918_s_at	216918_s_at	0.49	3.49	1.32
242708_at	242708_at	0.49	3.49	1.32
227289_at	PCDH17	0.49	3.47	1.31
244784_at	DHX57	0.49	3.48	1.31
1557384_at	1557384_at	0.5	4.72	2.16
219506_at	C1orf54	0.5	4.67	2.12
228927_at	ZNF397	0.5	4.66	2.12
239848_at	EIF3M	0.5	4.59	2.07
228613_at	RAB11FIP3	0.5	4.57	2.06
219871_at	FLJ13197	0.5	4.54	2.04
1558293_at	KIAA1107	0.5	4.53	2.03
221761_at	ADSS	0.5	4.47	1.99
226444_at	226444_at	0.5	4.47	1.99
205829_at	HSD17B1	0.5	4.46	1.98
228174_at	SCAI	0.5	4.43	1.97
225062_at	LOC389831	0.5	4.42	1.96
229312_s_at	GKAP1	0.5	4.43	1.96
1552879_a_at	ATOH7	0.5	4.41	1.95
223794_at	ARMC4	0.5	4.4	1.95
226610_at	CENPV	0.5	4.41	1.95
1556735_at	1556735_at	0.5	4.39	1.94
226192_at	AR	0.5	4.4	1.94
237075_at	237075_at	0.5	4.39	1.94
204982_at	GIT2	0.5	4.36	1.92
212726_at	PHF2	0.5	4.37	1.92
237333_at	RBBP4	0.5	4.36	1.92
205893_at	NLGN1	0.5	4.35	1.91
225706_at	GLCCI1	0.5	4.35	1.91
209403_at	209403_at	0.5	4.32	1.89
229645_at	FAM69C	0.5	4.32	1.89
219505_at	CECR1	0.5	4.3	1.88
207437_at	NOVA1	0.5	4.28	1.86
218421_at	CERK	0.5	4.26	1.85
238456_at	LOC100289230	0.5	4.26	1.85
225191_at	CIRBP	0.5	4.25	1.84
242418_at	C2orf27A	0.5	4.25	1.84
58780_s_at	ARHGEF40	0.5	4.25	1.84
235719_at	CYP4V2	0.5	4.23	1.83
1563638_at	TVP23A	0.5	4.16	1.78
217729_s_at	AES	0.5	4.16	1.78
1554686_at	STAU2	0.5	4.15	1.77
232576_at	232576_at	0.5	4.1	1.74
205883_at	ZBTB16	0.5	4.09	1.73
226644_at	MIB2	0.5	4.04	1.7
226713_at	CCDC50	0.5	4.05	1.7
238012_at	DPP7	0.5	4.02	1.69
229417_at	229417_at	0.5	3.99	1.66
242481_at	242481_at	0.5	3.97	1.64
232679_at	232679_at	0.5	3.94	1.63
206696_at	GPR143	0.5	3.94	1.62
238983_at	NSUN7	0.5	3.93	1.62
208536_s_at	BCL2L11	0.5	3.91	1.61
211006_s_at	KCNB1	0.5	3.92	1.61
228448_at	MAP6	0.5	3.9	1.6
1558600_a_at	1558600_a_at	0.5	3.88	1.59
213856_at	CD47	0.5	3.89	1.59
227835_at	LOC389831	0.5	3.88	1.59
210875_s_at	ZEB1	0.5	3.87	1.58
225656_at	EFHC1	0.5	3.87	1.58
238119_at	238119_at	0.5	3.86	1.57
244218_at	244218_at	0.5	3.84	1.56
212256_at	GALNT10	0.5	3.82	1.55
242210_at	ZNF24	0.5	3.77	1.51
239771_at	CAND1	0.5	3.66	1.44
243617_at	ZNF827	0.5	3.67	1.44
1562303_at	ZKSCAN3	0.5	3.63	1.42
1562497_at	1562497_at	0.5	3.63	1.42
232696_at	232696_at	0.5	3.59	1.39
242272_at	ZNF785	0.5	3.58	1.39
216218_s_at	PLCL2	0.5	3.52	1.34
219235_s_at	PHACTR4	0.5	3.48	1.32
236164_at	FLJ10038	0.5	3.47	1.31
242612_at	242612_at	0.51	4.63	2.1
48825_at	ING4	0.51	4.61	2.09
1565620_at	AGAP4	0.51	4.61	2.08
211955_at	IPO5	0.51	4.6	2.08
228999_at	CHD2	0.51	4.59	2.07
241863_x_at	241863_x_at	0.51	4.59	2.07
204036_at	LPAR1	0.51	4.57	2.06
215491_at	MYCL1	0.51	4.57	2.06
227408_s_at	SNX25	0.51	4.57	2.06
207183_at	GPR19	0.51	4.55	2.05
226611_s_at	CENPV	0.51	4.54	2.04
212758_s_at	ZEB1	0.51	4.52	2.03
227979_at	RBM4	0.51	4.53	2.03
227421_at	YBEY	0.51	4.49	2.01
241790_at	241790_at	0.51	4.49	2.01
212179_at	PNISR	0.51	4.47	1.99
244242_at	244242_at	0.51	4.46	1.99
1556643_at	LOC100507535	0.51	4.46	1.98
229071_at	C17orf100	0.51	4.45	1.97
242358_at	LOC100506451	0.51	4.44	1.97
226113_at	ZNF436	0.51	4.43	1.96
229914_at	FLJ38717	0.51	4.37	1.93
226820_at	ZNF362	0.51	4.36	1.92
244049_at	244049_at	0.51	4.36	1.92
213555_at	RWDD2A	0.51	4.34	1.91
224574_at	224574_at	0.51	4.36	1.91
51158_at	FAM174B	0.51	4.34	1.91
213413_at	STON1	0.51	4.34	1.9
225046_at	LOC389831	0.51	4.33	1.9
209925_at	OCLN	0.51	4.31	1.89
210867_at	CNOT4	0.51	4.31	1.89
230534_at	ZNF678	0.51	4.31	1.89
202088_at	SLC39A6	0.51	4.3	1.88
240224_at	240224_at	0.51	4.3	1.88
238824_at	238824_at	0.51	4.3	1.87
227525_at	GLCCI1	0.51	4.26	1.85
221272_s_at	C1orf21	0.51	4.23	1.83
226719_at	DERL2	0.51	4.2	1.81
212462_at	KAT6B	0.51	4.19	1.8
241699_at	241699_at	0.51	4.2	1.8
230815_at	LOC389765	0.51	4.14	1.77
232107_at	232107_at	0.51	4.14	1.77
235681_at	235681_at	0.51	4.15	1.77
229454_at	BCLAF1	0.51	4.11	1.74
209588_at	EPHB2	0.51	4.06	1.71
207169_x_at	207169_x_at	0.51	4.05	1.7
229687_s_at	PRDM11	0.51	4.05	1.7
1554182_at	1554182_at	0.51	4.03	1.69
243189_at	NRF1	0.51	4.03	1.69
218422_s_at	RBM26	0.51	4.01	1.68
228693_at	CCDC50	0.51	4.02	1.68
213776_at	LOC157562	0.51	3.99	1.66
1558310_s_at	LOC100132356	0.51	3.97	1.65
242096_at	242096_at	0.51	3.97	1.65
209871_s_at	APBA2	0.51	3.88	1.59
239559_at	239559_at	0.51	3.89	1.59
242343_x_at	242343_x_at	0.51	3.89	1.59
223132_s_at	TRIM8	0.51	3.87	1.58
211310_at	EZH1	0.51	3.85	1.57
242024_at	242024_at	0.51	3.86	1.57
225921_at	NIN	0.51	3.78	1.52
238852_at	PRRX1	0.51	3.78	1.52
239843_at	RIT1	0.51	3.77	1.51
1557809_a_at	1557809_a_at	0.51	3.73	1.49
238651_at	238651_at	0.51	3.74	1.49
236503_at	236503_at	0.51	3.72	1.48
1569315_s_at	LOC100272228	0.51	3.68	1.45
244646_at	244646_at	0.51	3.68	1.45
1562955_at	1562955_at	0.51	3.6	1.4
229266_at	SHISA6	0.51	3.57	1.38
241812_at	SPATS2L	0.51	3.55	1.36
221621_at	221621_at	0.51	3.52	1.34
229574_at	TRA2A	0.51	3.47	1.31
206852_at	EPHA7	0.51	3.45	1.3
226408_at	TEAD2	0.52	4.56	2.05
1569681_at	1569681_at	0.52	4.5	2.02
236723_at	236723_at	0.52	4.51	2.02
203413_at	NELL2	0.52	4.5	2.01
239343_at	LOC728705	0.52	4.5	2.01
225507_at	PNISR	0.52	4.49	2
235830_at	235830_at	0.52	4.48	2
235833_at	PPAT	0.52	4.47	1.99
243629_x_at	MFI2-AS1	0.52	4.47	1.99
224525_s_at	OLA1	0.52	4.45	1.98
231295_at	ME3	0.52	4.46	1.98
1552506_at	CRB2	0.52	4.44	1.97
219174_at	IFT74	0.52	4.45	1.97
222931_s_at	THNSL1	0.52	4.44	1.97
231090_s_at	ARID2	0.52	4.44	1.97
231560_at	231560_at	0.52	4.44	1.97
1558626_at	1558626_at	0.52	4.41	1.95
207127_s_at	HNRNPH3	0.52	4.41	1.95
230865_at	LIX1	0.52	4.4	1.95
210892_s_at	GTF2I	0.52	4.39	1.94
212677_s_at	CEP68	0.52	4.37	1.93
226563_at	SMAD2	0.52	4.38	1.93
228023_x_at	228023_x_at	0.52	4.36	1.92
221276_s_at	SYNC	0.52	4.33	1.9
226458_at	226458_at	0.52	4.29	1.87
213309_at	PLCL2	0.52	4.25	1.84
223854_at	223854_at	0.52	4.23	1.83
225272_at	SAT2	0.52	4.23	1.83
238229_at	TMEM67	0.52	4.23	1.83
217865_at	RNF130	0.52	4.21	1.82
229092_at	NR2F2	0.52	4.17	1.78
232454_at	232454_at	0.52	4.12	1.75
229596_at	AMDHD1	0.52	4.1	1.74
238688_at	TPM1	0.52	4.07	1.72
240172_at	ERGIC2	0.52	4.07	1.72
239872_at	239872_at	0.52	4.06	1.71
235268_at	235268_at	0.52	4.01	1.67
239725_at	PGAP1	0.52	3.99	1.67
221595_at	RBM48	0.52	3.97	1.65
219300_s_at	CNTNAP2	0.52	3.96	1.64
1554299_at	NPAS4	0.52	3.94	1.63
242087_x_at	MFI2-AS1	0.52	3.92	1.61
1569713_at	SEC24B-AS1	0.52	3.86	1.58
235164_at	ZNF25	0.52	3.84	1.56
235716_at	235716_at	0.52	3.83	1.56
229411_at	PNCK	0.52	3.81	1.54
229226_at	229226_at	0.52	3.75	1.5
239696_at	239696_at	0.52	3.73	1.48
242900_at	ALG10B	0.52	3.72	1.48
232020_at	SMURF2	0.52	3.64	1.43
1557064_s_at	HGSNAT	0.52	3.63	1.42
227666_at	DCLK2	0.52	3.61	1.41
227502_at	227502_at	0.52	3.57	1.38
228393_s_at	ZNF302	0.52	3.54	1.36
240485_at	240485_at	0.52	3.54	1.36
1564292_at	1564292_at	0.52	3.53	1.35
238472_at	FBXO9	0.52	3.51	1.34
243023_at	243023_at	0.52	3.5	1.33
235427_at	CFLAR	0.52	3.46	1.3
204759_at	RCBTB2	0.53	4.47	1.99
1569069_s_at	TDRD3	0.53	4.45	1.98
1558103_a_at	1558103_a_at	0.53	4.43	1.96
218325_s_at	DIDO1	0.53	4.43	1.96
235184_at	AEBP2	0.53	4.43	1.96
202137_s_at	ZMYND11	0.53	4.39	1.94
222541_at	RSF1	0.53	4.39	1.94
226908_at	LRIG3	0.53	4.4	1.94
235473_at	235473_at	0.53	4.39	1.94
203019_x_at	SSX2IP	0.53	4.37	1.93
215057_at	LOC100272228	0.53	4.38	1.93
1553696_s_at	ZNF569	0.53	4.34	1.9
1561906_at	1561906_at	0.53	4.31	1.88
232282_at	WNK3	0.53	4.3	1.87
242620_at	242620_at	0.53	4.29	1.87
210110_x_at	HNRNPH3	0.53	4.26	1.85
223568_s_at	PPAPDC1B	0.53	4.25	1.84
1558782_a_at	LOC100130557	0.53	4.17	1.79
213557_at	213557_at	0.53	4.18	1.79
239752_at	239752_at	0.53	4.18	1.79
214202_at	214202_at	0.53	4.16	1.78
224823_at	MYLK	0.53	4.16	1.78
214266_s_at	PDLIM7	0.53	4.13	1.76
236236_at	WNK3	0.53	4.11	1.75
200986_at	SERPING1	0.53	4.1	1.74
222847_s_at	EGLN3	0.53	4.08	1.73
1557402_at	1557402_at	0.53	4.08	1.72
202160_at	CREBBP	0.53	4.07	1.72
229211_at	DUSP28	0.53	4.07	1.72
209589_s_at	EPHB2	0.53	4.05	1.71
222807_at	C11orf30	0.53	4.05	1.7
206003_at	CEP135	0.53	4.03	1.69
206805_at	SEMA3A	0.53	4.03	1.69
219301_s_at	CNTNAP2	0.53	4.03	1.69
206846_s_at	HDAC6	0.53	4.01	1.68
225477_s_at	NR2C2	0.53	4.01	1.68
235640_at	235640_at	0.53	4.01	1.67
238989_at	C1GALT1C1	0.53	4.01	1.67
214985_at	EXT1	0.53	3.93	1.62
226527_at	RPRD2	0.53	3.93	1.62
1557059_at	LOC254128	0.53	3.9	1.6
235419_at	235419_at	0.53	3.9	1.6
239585_at	239585_at	0.53	3.87	1.58
218972_at	TTC17	0.53	3.86	1.57
212353_at	SULF1	0.53	3.84	1.56
231005_at	231005_at	0.53	3.83	1.55
210469_at	DLG5	0.53	3.79	1.53
227866_at	227866_at	0.53	3.76	1.51
200962_at	RPL31	0.53	3.75	1.5
241755_at	UQCRC2	0.53	3.76	1.5
235679_at	235679_at	0.53	3.74	1.49
229815_at	TMEM161B-AS1	0.53	3.69	1.46
242990_at	242990_at	0.53	3.7	1.46
229695_at	229695_at	0.53	3.67	1.45
235428_at	LOC100507316	0.53	3.68	1.45
1553167_a_at	SEPSECS	0.53	3.63	1.42
243183_at	243183_at	0.53	3.63	1.42
209847_at	CDH17	0.53	3.59	1.39
224185_at	WRAP53	0.53	3.59	1.39
225107_at	HNRNPA2B1	0.53	3.59	1.39
225396_at	RBBP4	0.53	3.49	1.32
228389_at	228389_at	0.53	3.46	1.3
1558102_at	1558102_at	0.54	4.41	1.95
225886_at	DDX5	0.54	4.4	1.94
205571_at	LIPT1	0.54	4.37	1.92
227533_at	227533_at	0.54	4.33	1.9
227276_at	PLXDC2	0.54	4.32	1.89
228211_at	ERCC6L2	0.54	4.32	1.89
1558154_at	1558154_at	0.54	4.28	1.86
1554780_a_at	PHTF2	0.54	4.26	1.85
203846_at	TRIM32	0.54	4.26	1.85
204400_at	EFS	0.54	4.25	1.84
218855_at	TPRA1	0.54	4.25	1.84
227630_at	PPP2R5E	0.54	4.25	1.84
210588_x_at	HNRNPH3	0.54	4.24	1.83
214790_at	SENP6	0.54	4.21	1.81
231789_at	PCDHB15	0.54	4.18	1.8
218770_s_at	TMEM39B	0.54	4.18	1.79
234192_s_at	GKAP1	0.54	4.18	1.79
216902_s_at	216902_s_at	0.54	4.16	1.78
230403_at	RFX3	0.54	4.16	1.78
223642_at	ZIC2	0.54	4.15	1.77
211165_x_at	EPHB2	0.54	4.12	1.76
217122_s_at	217122_s_at	0.54	4.12	1.75
218370_s_at	S100PBP	0.54	4.11	1.75
240636_at	240636_at	0.54	4.11	1.75
202089_s_at	SLC39A6	0.54	4.1	1.74
211547_s_at	PAFAH1B1	0.54	4.08	1.73
242847_at	C11orf30	0.54	4.08	1.73
1556551_s_at	SLC39A6	0.54	4.04	1.7
242273_at	242273_at	0.54	4.04	1.7
229116_at	CNKSR2	0.54	4.04	1.69
231954_at	DKFZP434I0714	0.54	4.01	1.68
207724_s_at	SPAST	0.54	3.99	1.66
211444_at	211444_at	0.54	3.98	1.65
222313_at	222313_at	0.54	3.97	1.65
210910_s_at	POMZP3	0.54	3.96	1.64
231864_at	ZNF33A	0.54	3.95	1.63
1559449_a_at	LOC100996381	0.54	3.92	1.62
233222_at	233222_at	0.54	3.93	1.62
237663_at	237663_at	0.54	3.92	1.62
214997_at	SCAI	0.54	3.92	1.61
244802_at	244802_at	0.54	3.9	1.6
1569128_at	C3orf38	0.54	3.88	1.59
232647_at	PROCA1	0.54	3.89	1.59
1554037_a_at	ZBTB24	0.54	3.86	1.58
228287_at	ING5	0.54	3.87	1.58
215258_at	CADM4	0.54	3.84	1.56
208151_x_at	DDX17	0.54	3.82	1.55
204078_at	LEPREL4	0.54	3.76	1.51
209431_s_at	PATZ1	0.54	3.76	1.51
229413_s_at	229413_s_at	0.54	3.77	1.51
227368_at	227368_at	0.54	3.75	1.5
239160_at	239160_at	0.54	3.72	1.48
1557104_at	ZSCAN30	0.54	3.7	1.46
204739_at	CENPC1	0.54	3.69	1.46
222995_s_at	RHBDD2	0.54	3.69	1.46
235547_at	N4BP2L2	0.54	3.7	1.46
236340_at	236340_at	0.54	3.69	1.46
1557659_a_at	1557659_a_at	0.54	3.68	1.45
213469_at	PGAP1	0.54	3.67	1.44
1558783_at	1558783_at	0.54	3.65	1.43
239184_at	239184_at	0.54	3.65	1.43
225633_at	DPY19L3	0.54	3.63	1.42
227622_at	PCF11	0.54	3.63	1.42
226164_x_at	RIMKLB	0.54	3.62	1.41
244362_at	244362_at	0.54	3.6	1.4
222239_s_at	INTS6	0.54	3.57	1.38
233014_at	233014_at	0.54	3.57	1.38
227947_at	PHACTR2	0.54	3.5	1.33
231484_at	231484_at	0.54	3.49	1.32
238076_at	GATAD2B	0.54	3.48	1.31
226814_at	ADAMTS9	0.54	3.46	1.3
232097_at	TOX4	0.54	3.46	1.3
241401_at	WDFY3-AS2	0.54	3.47	1.3
228275_at	LOC100505687	0.55	4.29	1.87
1555860_x_at	SETD5-AS1	0.55	4.26	1.85
229468_at	229468_at	0.55	4.26	1.85
240184_at	SYNPR-AS1	0.55	4.25	1.84
202304_at	FNDC3A	0.55	4.24	1.83
219012_s_at	C11orf30	0.55	4.23	1.83
227339_at	RGMB	0.55	4.22	1.82
229346_at	NES	0.55	4.21	1.81
226512_at	ZMYM2	0.55	4.18	1.79
208779_x_at	208779_x_at	0.55	4.16	1.78
227031_at	SNX13	0.55	4.16	1.78
227995_at	LOC100509635	0.55	4.15	1.78
220326_s_at	ARHGEF40	0.55	4.14	1.77
228905_at	PCM1	0.55	4.14	1.77
235647_at	AP4S1	0.55	4.14	1.77
207822_at	FGFR1	0.55	4.11	1.75
210056_at	RND1	0.55	4.09	1.73
238029_s_at	SLC16A14	0.55	4.09	1.73
214107_x_at	LOC440434	0.55	4.07	1.72
217681_at	WNT7B	0.55	4.07	1.72
1568868_at	CYP27C1	0.55	4.03	1.69
205698_s_at	MAP2K6	0.55	4.03	1.69
215412_x_at	215412_x_at	0.55	4.03	1.69
220055_at	ZNF287	0.55	3.98	1.65
225735_at	ANKRD50	0.55	3.97	1.65
227512_at	MEX3A	0.55	3.96	1.64
209153_s_at	TCF3	0.55	3.94	1.63
213157_s_at	213157_s_at	0.55	3.95	1.63
236650_at	236650_at	0.55	3.95	1.63
239209_at	239209_at	0.55	3.94	1.63
204417_at	GALC	0.55	3.93	1.62
223916_s_at	BCOR	0.55	3.92	1.61
231022_at	OCLN	0.55	3.88	1.59
227754_at	227754_at	0.55	3.87	1.58
208914_at	GGA2	0.55	3.84	1.56
212675_s_at	CEP68	0.55	3.84	1.56
210379_s_at	TLK1	0.55	3.79	1.53
230482_at	ST6GALNAC5	0.55	3.79	1.53
226722_at	FAM20C	0.55	3.76	1.5
1555882_at	SPIN3	0.55	3.74	1.49
239504_at	239504_at	0.55	3.73	1.49
241994_at	XDH	0.55	3.74	1.49
211422_at	TRPM3	0.55	3.71	1.47
217593_at	ZSCAN18	0.55	3.71	1.47
221290_s_at	MUM1	0.55	3.69	1.46
222133_s_at	PHF20L1	0.55	3.69	1.45
224767_at	224767_at	0.55	3.67	1.45
236609_at	PMS1	0.55	3.66	1.44
210743_s_at	CDC14A	0.55	3.64	1.43
221261_x_at	221261_x_at	0.55	3.64	1.42
242450_at	RGMB	0.55	3.64	1.42
209285_s_at	FAM208A	0.55	3.62	1.41
212792_at	DPY19L1	0.55	3.61	1.41
235501_at	235501_at	0.55	3.62	1.41
221616_s_at	TAF9B	0.55	3.59	1.39
236241_at	MED31	0.55	3.57	1.38
232242_at	PTPRG-AS1	0.55	3.55	1.37
220667_at	USP49	0.55	3.55	1.36
223846_at	AZI2	0.55	3.53	1.35
230700_at	RTN4RL1	0.55	3.53	1.35
206404_at	FGF9	0.55	3.5	1.33
214016_s_at	SFPQ	0.55	3.51	1.33
242176_at	MEF2A	0.55	3.46	1.3
1559544_s_at	LINC00441	0.56	4.18	1.79
232216_at	YME1L1	0.56	4.16	1.78
1554543_at	SPAG9	0.56	4.15	1.77
1556021_at	GPR180	0.56	4.14	1.77
208089_s_at	TDRD3	0.56	4.14	1.77
210871_x_at	SSX2IP	0.56	4.15	1.77
225700_at	GLCCI1	0.56	4.15	1.77
225731_at	ANKRD50	0.56	4.15	1.77
231950_at	231950_at	0.56	4.15	1.77
226529_at	TMEM106B	0.56	4.12	1.75
227618_at	227618_at	0.56	4.1	1.74
201506_at	TGFBI	0.56	4.09	1.73
205933_at	SETBP1	0.56	4.08	1.72
227934_at	KPNA5	0.56	4.07	1.72
215351_at	RTCA	0.56	4.05	1.7
235939_at	235939_at	0.56	4.04	1.7
1556116_s_at	TNPO1	0.56	4.04	1.69
210563_x_at	CFLAR	0.56	4.01	1.68
201321_s_at	SMARCC2	0.56	4	1.67
224755_at	TM9SF3	0.56	4.01	1.67
227948_at	FGD4	0.56	4	1.67
235890_at	TBL1XR1	0.56	4	1.67
237745_at	TSC22D1-AS1	0.56	3.99	1.66
212991_at	FBXO9	0.56	3.97	1.65
227434_at	WBSCR17	0.56	3.98	1.65
212000_at	SUGP2	0.56	3.96	1.64
223932_at	223932_at	0.56	3.96	1.64
1555460_a_at	SLC39A6	0.56	3.92	1.62
207034_s_at	GLI2	0.56	3.93	1.62
222806_s_at	C11orf30	0.56	3.92	1.62
227496_at	227496_at	0.56	3.93	1.62
235082_at	PCNX	0.56	3.93	1.62
207186_s_at	207186_s_at	0.56	3.91	1.61
227578_at	TMPO-AS1	0.56	3.92	1.61
229464_at	MYEF2	0.56	3.92	1.61
230149_at	230149_at	0.56	3.91	1.61
235309_at	RPS15A	0.56	3.92	1.61
222787_s_at	TMEM106B	0.56	3.9	1.6
1557325_at	1557325_at	0.56	3.89	1.59
205181_at	ZSCAN9	0.56	3.89	1.59
214192_at	NUP88	0.56	3.88	1.59
214239_x_at	214239_x_at	0.56	3.86	1.57
229817_at	ZNF608	0.56	3.86	1.57
221138_s_at	221138_s_at	0.56	3.84	1.56
226156_at	AKT2	0.56	3.85	1.56
237247_at	USP51	0.56	3.83	1.56
1555858_at	SETD5-AS1	0.56	3.83	1.55
222434_at	ENAH	0.56	3.82	1.55
230129_at	PSTK	0.56	3.83	1.55
230787_at	230787_at	0.56	3.82	1.55
210749_x_at	210749_x_at	0.56	3.81	1.54
232488_at	AGXT2L2	0.56	3.81	1.54
210475_at	POU3F1	0.56	3.8	1.53
230932_at	230932_at	0.56	3.79	1.52
235725_at	SMAD4	0.56	3.77	1.52
217594_at	ZCCHC11	0.56	3.77	1.51
235612_at	235612_at	0.56	3.77	1.51
241851_x_at	LOC100130429	0.56	3.75	1.5
224938_at	NUFIP2	0.56	3.73	1.49
222626_at	RBM26	0.56	3.72	1.48
1553400_a_at	CRHR1-IT1	0.56	3.72	1.47
1557081_at	RBM25	0.56	3.7	1.46
215145_s_at	CNTNAP2	0.56	3.69	1.46
216705_s_at	ADA	0.56	3.7	1.46
202326_at	EHMT2	0.56	3.68	1.45
215281_x_at	POGZ	0.56	3.68	1.45
223313_s_at	223313_s_at	0.56	3.68	1.45
244198_at	RANBP17	0.56	3.65	1.43
1552739_s_at	ST7L	0.56	3.63	1.42
229017_s_at	DSTYK	0.56	3.64	1.42
223095_at	MARVELD1	0.56	3.62	1.41
229694_at	WDR11	0.56	3.62	1.41
213046_at	PABPN1	0.56	3.61	1.4
204148_s_at	204148_s_at	0.56	3.59	1.39
218879_s_at	MTHFSD	0.56	3.57	1.38
230154_at	WAC	0.56	3.57	1.38
225954_s_at	MIDN	0.56	3.56	1.37
1563776_at	LOC100507283	0.56	3.53	1.35
206706_at	NTF3	0.56	3.53	1.35
232533_at	METTL8	0.56	3.5	1.33
207492_at	NGLY1	0.56	3.48	1.32
219603_s_at	ZNF226	0.56	3.49	1.32
244450_at	244450_at	0.56	3.49	1.32
239163_at	UBE2B	0.56	3.45	1.3
1553750_a_at	FAM76B	0.57	4.12	1.75
229279_at	229279_at	0.57	4.1	1.74
1559856_s_at	MLL	0.57	4.07	1.72
210323_at	TEKT2	0.57	4.07	1.72
227982_at	SEPSECS	0.57	4.07	1.72
236196_at	236196_at	0.57	4.06	1.71
240627_x_at	MSANTD4	0.57	4.06	1.71
230392_at	230392_at	0.57	4.04	1.7
239295_at	SRSF12	0.57	4.04	1.7
1562053_at	1562053_at	0.57	4.01	1.68
225074_at	RAB2B	0.57	4.02	1.68
230871_at	DHX30	0.57	4.02	1.68
1564746_at	SLC9B2	0.57	3.99	1.66
209682_at	CBLB	0.57	3.98	1.65
1568695_s_at	INTS6	0.57	3.96	1.64
200815_s_at	PAFAH1B1	0.57	3.96	1.64
225855_at	EPB41L5	0.57	3.94	1.63
228358_at	SOX12	0.57	3.94	1.63
231967_at	PHF20L1	0.57	3.95	1.63
226150_at	PPAPDC1B	0.57	3.92	1.61
230835_at	KRTDAP	0.57	3.91	1.61
243439_at	ZNF418	0.57	3.91	1.61
205340_at	ZBTB24	0.57	3.9	1.6
213852_at	213852_at	0.57	3.9	1.6
215090_x_at	LOC440434	0.57	3.9	1.6
242974_at	CD47	0.57	3.89	1.6
228742_at	228742_at	0.57	3.88	1.59
239253_at	239253_at	0.57	3.89	1.59
228131_at	ERCC1	0.57	3.87	1.58
236882_at	236882_at	0.57	3.85	1.57
1557147_a_at	1557147_a_at	0.57	3.83	1.55
1561687_a_at	ZNF382	0.57	3.82	1.55
220549_at	220549_at	0.57	3.83	1.55
1556338_at	1556338_at	0.57	3.81	1.54
201449_at	TIA1	0.57	3.8	1.54
204047_s_at	PHACTR2	0.57	3.79	1.53
219800_s_at	THNSL1	0.57	3.8	1.53
230850_at	230850_at	0.57	3.77	1.51
238839_at	OTX1	0.57	3.77	1.51
1555874_x_at	MGC21881	0.57	3.75	1.5
226322_at	TMTC1	0.57	3.76	1.5
239888_at	239888_at	0.57	3.75	1.5
242390_at	242390_at	0.57	3.76	1.5
229288_at	EPHA7	0.57	3.74	1.49
236798_at	LOC100505687	0.57	3.74	1.49
222273_at	PAPOLG	0.57	3.73	1.48
235308_at	ZBTB20	0.57	3.72	1.48
1556389_at	CNPY3	0.57	3.71	1.47
227793_at	MIRLET7D	0.57	3.71	1.47
238444_at	ZNF618	0.57	3.71	1.47
215246_at	LARP7	0.57	3.69	1.45
231966_at	PPP1R9A	0.57	3.69	1.45
214177_s_at	PBXIP1	0.57	3.67	1.44
226865_at	LOC100509635	0.57	3.66	1.44
235063_at	C20orf196	0.57	3.67	1.44
206345_s_at	PON1	0.57	3.64	1.43
228329_at	DAB1	0.57	3.65	1.43
205682_x_at	APOM	0.57	3.6	1.4
221285_at	ST8SIA2	0.57	3.61	1.4
235840_at	ZKSCAN3	0.57	3.6	1.4
223348_x_at	MUM1	0.57	3.58	1.39
239785_at	DZIP1L	0.57	3.57	1.38
227154_at	IGSF21	0.57	3.55	1.37
229544_at	229544_at	0.57	3.55	1.37
212542_s_at	PHIP	0.57	3.51	1.34
222999_s_at	CCNL2	0.57	3.52	1.34
1554663_a_at	NUMA1	0.57	3.5	1.33
204520_x_at	BRD1	0.57	3.51	1.33
215386_at	215386_at	0.57	3.48	1.32
226715_at	FOXK1	0.57	3.49	1.32
241825_at	TYW5	0.57	3.48	1.32
212079_s_at	MLL	0.57	3.48	1.31
208990_s_at	HNRNPH3	0.58	3.99	1.66
206053_at	ZNF510	0.58	3.98	1.65
200896_x_at	HDGF	0.58	3.95	1.63
230715_at	ZNF518B	0.58	3.95	1.63
1559026_at	LOC100506599	0.58	3.93	1.62
222125_s_at	P4HTM	0.58	3.92	1.61
225490_at	ARID2	0.58	3.91	1.61
225677_at	BCAP29	0.58	3.92	1.61
239165_at	239165_at	0.58	3.92	1.61
204049_s_at	PHACTR2	0.58	3.9	1.6
223013_at	TBL1XR1	0.58	3.9	1.6
236030_at	RCOR2	0.58	3.91	1.6
217596_at	UPF3A	0.58	3.89	1.59
225807_at	AJUBA	0.58	3.89	1.59
243456_at	ZNF214	0.58	3.88	1.59
203651_at	ZFYVE16	0.58	3.88	1.58
214807_at	LOC100509635	0.58	3.84	1.56
226519_s_at	AGXT2L2	0.58	3.84	1.56
228914_at	228914_at	0.58	3.84	1.56
201389_at	ITGA5	0.58	3.82	1.55
204743_at	TAGLN3	0.58	3.82	1.55
220751_s_at	C5orf4	0.58	3.82	1.55
233191_at	RUFY2	0.58	3.83	1.55
223169_s_at	RHOU	0.58	3.81	1.54
218412_s_at	GTF2IRD1	0.58	3.79	1.53
225503_at	DHRSX	0.58	3.78	1.52
215460_x_at	BRD1	0.58	3.76	1.51
219635_at	ZNF606	0.58	3.76	1.51
235782_at	235782_at	0.58	3.77	1.51
217627_at	ZNF573	0.58	3.76	1.5
226197_at	AR	0.58	3.76	1.5
235721_at	DTX3	0.58	3.73	1.49
239271_at	SMAD2	0.58	3.73	1.48
204048_s_at	PHACTR2	0.58	3.71	1.47
218819_at	INTS6	0.58	3.69	1.46
237371_at	237371_at	0.58	3.69	1.46
1557137_at	TMEM17	0.58	3.68	1.45
240279_at	240279_at	0.58	3.68	1.45
218445_at	H2AFY2	0.58	3.67	1.44
223494_at	MGEA5	0.58	3.66	1.44
211987_at	TOP2B	0.58	3.65	1.43
218678_at	NES	0.58	3.64	1.43
221519_at	FBXW4	0.58	3.65	1.43
206580_s_at	EFEMP2	0.58	3.62	1.41
241205_at	241205_at	0.58	3.61	1.41
238768_at	C2orf68	0.58	3.61	1.4
243224_at	LOC100506302	0.58	3.6	1.4
231725_at	PCDHB2	0.58	3.59	1.39
226346_at	MEX3A	0.58	3.55	1.36
237332_at	237332_at	0.58	3.54	1.36
206970_at	CNTN2	0.58	3.5	1.33
209208_at	MPDU1	0.58	3.5	1.33
228316_at	CLHC1	0.58	3.5	1.33
202617_s_at	MECP2	0.58	3.49	1.32
233022_at	TRPM3	0.58	3.49	1.32
237040_at	CWF19L2	0.58	3.5	1.32
236116_at	236116_at	0.58	3.47	1.31
215228_at	NHLH2	0.58	3.46	1.3
225668_at	FAM173B	0.58	3.45	1.3
242856_at	242856_at	0.58	3.45	1.3
201350_at	FLOT2	0.59	3.9	1.6
223610_at	SEMA5B	0.59	3.9	1.6
242766_at	242766_at	0.59	3.9	1.6
244370_at	KIAA2022	0.59	3.9	1.6
205830_at	CLGN	0.59	3.88	1.59
229317_at	KPNA5	0.59	3.89	1.59
1553269_at	ZNF718	0.59	3.87	1.58
1553634_a_at	FLJ40852	0.59	3.88	1.58
227468_at	CPT1C	0.59	3.87	1.58
229722_at	LOC100270804	0.59	3.87	1.58
207839_s_at	TMEM8B	0.59	3.85	1.57
220997_s_at	DIAPH3	0.59	3.85	1.57
231312_at	231312_at	0.59	3.86	1.57
1552381_at	SRSF12	0.59	3.84	1.56
229272_at	FNBP4	0.59	3.84	1.56
1554176_a_at	C3orf33	0.59	3.83	1.55
201245_s_at	OTUB1	0.59	3.83	1.55
227492_at	227492_at	0.59	3.82	1.55
227798_at	SMAD1	0.59	3.83	1.55
238533_at	EPHA7	0.59	3.82	1.55
1556736_at	LOC100129858	0.59	3.81	1.54
207550_at	MPL	0.59	3.81	1.54
223190_s_at	MLL5	0.59	3.82	1.54
231921_at	DCAF17	0.59	3.8	1.54
232881_at	GNAS-AS1	0.59	3.79	1.53
242472_x_at	FNBP4	0.59	3.8	1.53
203724_s_at	RUFY3	0.59	3.78	1.52
233515_at	233515_at	0.59	3.77	1.52
1007_s_at	1007_s_at	0.59	3.77	1.51
219010_at	C1orf106	0.59	3.74	1.49
205105_at	MAN2A1	0.59	3.71	1.47
215232_at	ARHGAP44	0.59	3.71	1.47
236664_at	AKT2	0.59	3.71	1.47
226590_at	ZNF618	0.59	3.7	1.46
201869_s_at	TBL1X	0.59	3.68	1.45
206613_s_at	TAF1A	0.59	3.68	1.45
224719_s_at	C12orf57	0.59	3.68	1.45
228333_at	ZEB2	0.59	3.68	1.45
235980_at	PIK3CA	0.59	3.68	1.45
32259_at	EZH1	0.59	3.68	1.45
215894_at	PTGDR	0.59	3.66	1.44
218569_s_at	KBTBD4	0.59	3.67	1.44
225957_at	CREBRF	0.59	3.66	1.44
238851_at	ANKRD13A	0.59	3.66	1.44
231975_s_at	MIER3	0.59	3.65	1.43
238109_at	238109_at	0.59	3.64	1.42
32069_at	N4BP1	0.59	3.64	1.42
218702_at	218702_at	0.59	3.61	1.41
216885_s_at	DCAF8	0.59	3.59	1.4
203319_s_at	ZNF148	0.59	3.59	1.39
230789_at	ZNF280B	0.59	3.58	1.39
210658_s_at	GGA2	0.59	3.56	1.37
222001_x_at	222001_x_at	0.59	3.55	1.37
222772_at	MYEF2	0.59	3.54	1.36
230687_at	SLC13A3	0.59	3.54	1.36
230095_at	230095_at	0.59	3.51	1.34
205501_at	PDE10A	0.59	3.51	1.33
235520_at	ZNF280C	0.59	3.5	1.33
1556487_a_at	MAATS1	0.59	3.48	1.32
223178_s_at	NT5DC1	0.59	3.47	1.31
242091_at	ZNF720	0.59	3.47	1.31
210572_at	PCDHA2	0.59	3.46	1.3
226687_at	PRPF40A	0.59	3.46	1.3
241801_at	PGAP1	0.59	3.45	1.3
213698_at	213698_at	0.6	3.86	1.58
223165_s_at	IP6K2	0.6	3.87	1.58
238174_at	238174_at	0.6	3.86	1.57
241826_x_at	ZNF738	0.6	3.85	1.57
206470_at	PLXNC1	0.6	3.83	1.55
209705_at	MTF2	0.6	3.83	1.55
228920_at	ZNF260	0.6	3.83	1.55
238509_at	CUL1	0.6	3.83	1.55
227406_at	GABPB1-AS1	0.6	3.81	1.54
229231_at	229231_at	0.6	3.81	1.54
232048_at	FAM76B	0.6	3.81	1.54
203271_s_at	UNC119	0.6	3.8	1.53
236693_at	LOC100130155	0.6	3.79	1.53
218570_at	218570_at	0.6	3.79	1.52
221428_s_at	TBL1XR1	0.6	3.78	1.52
222595_s_at	DIDO1	0.6	3.79	1.52
222633_at	TBL1XR1	0.6	3.79	1.52
1556597_a_at	LOC284513	0.6	3.76	1.51
235928_at	ZNF503-AS2	0.6	3.76	1.51
238836_at	238836_at	0.6	3.75	1.5
241911_at	CDKL3	0.6	3.73	1.49
206958_s_at	UPF3A	0.6	3.72	1.48
221825_at	ANGEL2	0.6	3.72	1.48
226441_at	MAP3K2	0.6	3.72	1.48
243213_at	STAT3	0.6	3.73	1.48
216645_at	TCF3	0.6	3.72	1.47
200919_at	PHC2	0.6	3.69	1.46
224220_x_at	TRPC4	0.6	3.69	1.46
228702_at	FLJ43663	0.6	3.69	1.46
243948_at	243948_at	0.6	3.69	1.46
212986_s_at	TLK2	0.6	3.67	1.45
213725_x_at	XYLT1	0.6	3.66	1.44
226155_at	FAM160B1	0.6	3.66	1.44
222540_s_at	RSF1	0.6	3.64	1.43
203409_at	DDB2	0.6	3.63	1.42
228880_at	NAT8L	0.6	3.63	1.42
230942_at	CMTM5	0.6	3.62	1.42
229966_at	EWSR1	0.6	3.61	1.41
230142_s_at	CIRBP	0.6	3.6	1.4
240146_at	240146_at	0.6	3.59	1.4
1555841_at	MSANTD3	0.6	3.58	1.39
212001_at	SUGP2	0.6	3.57	1.38
226989_at	RGMB	0.6	3.56	1.37
244132_x_at	ZNF518A	0.6	3.56	1.37
1570143_at	1570143_at	0.6	3.55	1.36
222610_s_at	S100PBP	0.6	3.53	1.35
237616_at	237616_at	0.6	3.53	1.35
243829_at	BRAF	0.6	3.53	1.35
201975_at	CLIP1	0.6	3.51	1.34
214323_s_at	UPF3A	0.6	3.5	1.33
217615_at	217615_at	0.6	3.5	1.33
227506_at	SLC16A9	0.6	3.5	1.33
230678_at	RGS5	0.6	3.5	1.33
235579_at	SCAF11	0.6	3.5	1.33
236916_at	236916_at	0.6	3.51	1.33
228510_at	ATAT1	0.6	3.49	1.32
230724_s_at	C11orf57	0.6	3.49	1.32
236795_at	236795_at	0.6	3.49	1.32
237469_at	TOP2A	0.6	3.48	1.32
201448_at	TIA1	0.6	3.47	1.31
229793_at	ASAH2B	0.6	3.47	1.31
213267_at	DOPEY1	0.6	3.46	1.3
228828_at	BZRAP1-AS1	0.6	3.45	1.3
242462_at	LINC00665	0.6	3.45	1.3
228326_at	WDR27	0.61	3.78	1.52
213339_at	TP73-AS1	0.61	3.75	1.5
217765_at	NRBP1	0.61	3.73	1.49
220321_s_at	CCDC121	0.61	3.74	1.49
227273_at	227273_at	0.61	3.73	1.49
242692_at	242692_at	0.61	3.73	1.49
205347_s_at	205347_s_at	0.61	3.71	1.47
207247_s_at	207247_s_at	0.61	3.71	1.47
205447_s_at	MAP3K12	0.61	3.7	1.46
218234_at	ING4	0.61	3.7	1.46
225178_at	TTC14	0.61	3.69	1.46
219798_s_at	MEPCE	0.61	3.68	1.45
228302_x_at	CAMK2N1	0.61	3.68	1.45
229243_at	229243_at	0.61	3.67	1.45
235015_at	ZDHHC9	0.61	3.68	1.45
206140_at	LHX2	0.61	3.66	1.44
212138_at	PDS5A	0.61	3.66	1.44
221626_at	ZNF506	0.61	3.66	1.44
225836_s_at	RHNO1	0.61	3.66	1.44
226102_at	226102_at	0.61	3.66	1.44
228719_at	ZSWIM7	0.61	3.67	1.44
234285_at	SYNGAP1	0.61	3.67	1.44
202980_s_at	SIAH1	0.61	3.65	1.43
214678_x_at	ZFX	0.61	3.65	1.43
220254_at	LRP12	0.61	3.65	1.43
223652_at	AS3MT	0.61	3.64	1.43
1553218_a_at	ZNF512	0.61	3.63	1.42
202555_s_at	MYLK	0.61	3.63	1.42
203016_s_at	SSX2IP	0.61	3.63	1.42
207223_s_at	PTBP3	0.61	3.63	1.42
1561597_x_at	1561597_x_at	0.61	3.61	1.41
202979_s_at	CREBZF	0.61	3.61	1.41
228185_at	ZNF25	0.61	3.62	1.41
228981_at	TMEM169	0.61	3.61	1.41
232884_s_at	ZNF853	0.61	3.61	1.41
238154_at	CEP70	0.61	3.61	1.41
244171_at	MKLN1	0.61	3.6	1.4
1569240_at	ZNF93	0.61	3.58	1.39
217976_s_at	DYNC1LI1	0.61	3.59	1.39
218309_at	CAMK2N1	0.61	3.59	1.39
228545_at	ZNF148	0.61	3.58	1.39
239339_at	239339_at	0.61	3.59	1.39
242919_at	ZNF253	0.61	3.59	1.39
1558700_s_at	ZNF260	0.61	3.57	1.38
210993_s_at	SMAD1	0.61	3.55	1.37
223311_s_at	MTA3	0.61	3.56	1.37
1556195_a_at	1556195_a_at	0.61	3.54	1.36
1557616_at	ZNF496	0.61	3.52	1.35
201447_at	TIA1	0.61	3.53	1.35
1558934_a_at	GTF2H5	0.61	3.52	1.34
232149_s_at	NSMAF	0.61	3.52	1.34
203506_s_at	MED12	0.61	3.51	1.33
213499_at	CLCN2	0.61	3.49	1.32
215509_s_at	BUB1	0.61	3.48	1.32
219726_at	NLGN3	0.61	3.49	1.32
213400_s_at	TBL1X	0.61	3.47	1.31
218629_at	SMO	0.61	3.47	1.31
242455_at	POU3F2	0.61	3.48	1.31
1563483_at	FAM91A2	0.61	3.46	1.3
237347_at	237347_at	0.61	3.46	1.3
209764_at	MGAT3	0.62	3.65	1.43
227332_at	PXN-AS1	0.62	3.65	1.43
226781_at	C7orf55	0.62	3.63	1.42
227728_at	PPM1A	0.62	3.64	1.42
230597_at	SLC7A3	0.62	3.63	1.42
1556176_at	TAF8	0.62	3.61	1.41
1559496_at	PPA2	0.62	3.62	1.41
211954_s_at	IPO5	0.62	3.62	1.41
219794_at	VPS53	0.62	3.62	1.41
227020_at	YPEL2	0.62	3.62	1.41
241206_at	241206_at	0.62	3.62	1.41
1557196_a_at	1557196_a_at	0.62	3.59	1.4
1565809_x_at	1565809_x_at	0.62	3.6	1.4
218490_s_at	ZNF302	0.62	3.61	1.4
241417_at	241417_at	0.62	3.6	1.4
244534_at	244534_at	0.62	3.6	1.4
1558807_at	ATAD2B	0.62	3.58	1.39
244873_s_at	244873_s_at	0.62	3.57	1.38
1555125_at	PAXBP1	0.62	3.55	1.37
203076_s_at	SMAD2	0.62	3.55	1.36
208079_s_at	AURKA	0.62	3.55	1.36
236953_s_at	NHLRC3	0.62	3.54	1.36
222276_at	METTL2B	0.62	3.53	1.35
222800_at	TRNAU1AP	0.62	3.51	1.34
223358_s_at	PDE7A	0.62	3.52	1.34
228225_at	PEX2	0.62	3.52	1.34
203318_s_at	ZNF148	0.62	3.5	1.33
219549_s_at	RTN3	0.62	3.5	1.33
220409_at	CAMSAP1	0.62	3.5	1.33
227603_at	227603_at	0.62	3.51	1.33
230087_at	PRIMA1	0.62	3.51	1.33
232125_at	232125_at	0.62	3.51	1.33
202220_at	KIAA0907	0.62	3.49	1.32
203069_at	SV2A	0.62	3.5	1.32
208829_at	TAPBP	0.62	3.49	1.32
213215_at	213215_at	0.62	3.49	1.32
219400_at	CNTNAP1	0.62	3.48	1.32
226399_at	DNAJB14	0.62	3.5	1.32
1559403_at	LOC100288198	0.62	3.47	1.31
212653_s_at	EHBP1	0.62	3.47	1.31
225159_s_at	ELK4	0.62	3.48	1.31
1570048_at	DNAJC24	0.62	3.46	1.3
218683_at	PTBP2	0.62	3.47	1.3
224710_at	224710_at	0.62	3.47	1.3
237665_at	237665_at	0.62	3.46	1.3
215985_at	215985_at	0.63	3.58	1.39
225939_at	EIF4E3	0.63	3.57	1.38
230616_at	LAMB2P1	0.63	3.57	1.38
200740_s_at	SUMO3	0.63	3.56	1.37
233950_at	CADPS	0.63	3.56	1.37
225752_at	NIPA1	0.63	3.54	1.36
227331_at	ZNF740	0.63	3.55	1.36
202051_s_at	ZMYM4	0.63	3.53	1.35
204732_s_at	TRIM23	0.63	3.52	1.35
217797_at	UFC1	0.63	3.53	1.35
209022_at	STAG2	0.63	3.52	1.34
212078_s_at	MLL	0.63	3.52	1.34
224876_at	C5orf24	0.63	3.52	1.34
226780_s_at	C7orf55	0.63	3.51	1.34
203875_at	SMARCA1	0.63	3.5	1.33
204838_s_at	MLH3	0.63	3.5	1.33
207118_s_at	207118_s_at	0.63	3.5	1.33
223318_s_at	ALKBH7	0.63	3.5	1.33
242065_x_at	IDI1	0.63	3.5	1.33
203793_x_at	PCGF2	0.63	3.49	1.32
226254_s_at	KIAA1430	0.63	3.48	1.32
235240_at	ATXN3	0.63	3.47	1.31
225240_s_at	MSI2	0.63	3.46	1.3
230556_at	IMMP1L	0.63	3.46	1.3
233685_at	233685_at	0.63	3.46	1.3
237689_at	237689_at	0.63	3.46	1.3
1562275_at	1562275_at	0.64	3.46	1.3
203343_at	UGDH	0.64	3.45	1.3
224417_at	224417_at	0.64	3.45	1.3
229903_x_at	RNPC3	0.64	3.46	1.3
228059_x_at	MRPS22	1.57	3.47	1.31
228877_at	RGL3	1.57	3.45	1.3
230051_at	PROSER2	1.57	3.46	1.3
213134_x_at	BTG3	1.58	3.54	1.35
228825_at	PTGR1	1.58	3.53	1.35
202165_at	PPP1R2	1.58	3.51	1.34
201489_at	PPIF	1.58	3.51	1.33
221510_s_at	GLS	1.58	3.51	1.33
207508_at	ATP5G3	1.58	3.49	1.32
208693_s_at	GARS	1.58	3.47	1.31
212223_at	IDS	1.58	3.48	1.31
200895_s_at	FKBP4	1.58	3.47	1.3
220865_s_at	PDSS1	1.59	3.57	1.38
204912_at	IL10RA	1.59	3.56	1.37
224606_at	KLF6	1.59	3.54	1.36
227634_at	STK32C	1.59	3.54	1.36
206258_at	ST8SIA5	1.59	3.51	1.34
210978_s_at	TAGLN2	1.59	3.52	1.34
212971_at	CARS	1.59	3.47	1.3
217127_at	CTH	1.59	3.46	1.3
224641_at	FYTTD1	1.6	3.58	1.39
238762_at	MTHFD2L	1.6	3.58	1.39
1556210_at	1556210_at	1.6	3.57	1.38
223214_s_at	ZHX1	1.6	3.57	1.38
239824_s_at	TMEM107	1.6	3.58	1.38
226446_at	HES6	1.6	3.56	1.37
210396_s_at	210396_s_at	1.6	3.53	1.35
237248_at	PDE11A	1.6	3.5	1.33
208399_s_at	EDN3	1.6	3.49	1.32
209465_x_at	PTN	1.6	3.49	1.32
40016_g_at	MAST4	1.6	3.49	1.32
204328_at	TMC6	1.6	3.48	1.31
238539_at	HPS3	1.6	3.46	1.3
212208_at	MED13L	1.61	3.61	1.41
212848_s_at	212848_s_at	1.61	3.6	1.4
220255_at	FANCE	1.61	3.59	1.4
213103_at	STARD13	1.61	3.59	1.39
227115_at	LOC100506870	1.61	3.59	1.39
224994_at	CAMK2D	1.61	3.57	1.38
226792_s_at	KIFC2	1.61	3.57	1.38
226803_at	CHMP4C	1.61	3.57	1.38
224654_at	DDX21	1.61	3.56	1.37
226553_at	TMPRSS2	1.61	3.55	1.36
225304_s_at	225304_s_at	1.61	3.53	1.35
242056_at	TRIM45	1.61	3.53	1.35
205590_at	RASGRP1	1.61	3.52	1.34
212048_s_at	YARS	1.61	3.46	1.3
219821_s_at	GFOD1	1.61	3.45	1.3
1555829_at	ESYT2	1.62	3.66	1.44
205750_at	BPHL	1.62	3.64	1.42
201648_at	JAK1	1.62	3.6	1.4
210186_s_at	FKBP1A	1.62	3.6	1.4
242245_at	242245_at	1.62	3.57	1.38
225968_at	PRICKLE2	1.62	3.55	1.37
226682_at	RORA	1.62	3.55	1.36
223989_s_at	REXO2	1.62	3.53	1.35
212053_at	PDXDC1	1.62	3.51	1.34
222159_at	222159_at	1.62	3.47	1.31
223079_s_at	GLS	1.62	3.48	1.31
201146_at	NFE2L2	1.62	3.46	1.3
218109_s_at	MFSD1	1.62	3.45	1.3
222376_at	222376_at	1.63	3.71	1.47
208663_s_at	208663_s_at	1.63	3.69	1.46
211343_s_at	COL13A1	1.63	3.69	1.46
215253_s_at	RCAN1	1.63	3.69	1.46
220714_at	PRDM14	1.63	3.7	1.46
205480_s_at	UGP2	1.63	3.67	1.45
227780_s_at	ECSCR	1.63	3.68	1.45
211474_s_at	SERPINB6	1.63	3.67	1.44
225520_at	MTHFD1L	1.63	3.67	1.44
226273_at	CLCN5	1.63	3.66	1.44
208905_at	CYCS	1.63	3.65	1.43
214823_at	ZNF204P	1.63	3.65	1.43
202880_s_at	CYTH1	1.63	3.63	1.42
244867_at	244867_at	1.63	3.63	1.42
217691_x_at	SLC16A3	1.63	3.6	1.4
1553991_s_at	VSIG10	1.63	3.59	1.39
212973_at	RPIA	1.63	3.59	1.39
221987_s_at	TSR1	1.63	3.55	1.37
227221_at	ZMAT3	1.63	3.56	1.37
226193_x_at	226193_x_at	1.63	3.54	1.35
208714_at	NDUFV1	1.63	3.5	1.33
222653_at	PNPO	1.63	3.48	1.32
222513_s_at	SORBS1	1.64	3.74	1.49
240433_x_at	CADM2	1.64	3.74	1.49
211963_s_at	ARPC5	1.64	3.7	1.47
204001_at	SNAPC3	1.64	3.68	1.45
200822_x_at	TPI1	1.64	3.66	1.44
201036_s_at	HADH	1.64	3.66	1.44
216184_s_at	RIMS1	1.64	3.67	1.44
202003_s_at	ACAA2	1.64	3.64	1.43
212828_at	SYNJ2	1.64	3.65	1.43
209181_s_at	209181_s_at	1.64	3.63	1.42
213948_x_at	CADM3	1.64	3.63	1.42
209466_x_at	PTN	1.64	3.55	1.36
1552256_a_at	SCARB1	1.64	3.53	1.35
201021_s_at	DSTN	1.64	3.52	1.34
232827_at	232827_at	1.64	3.51	1.34
209204_at	LMO4	1.64	3.49	1.32
222442_s_at	ARL8B	1.64	3.49	1.32
203928_x_at	MAPT	1.64	3.46	1.3
221667_s_at	HSPB8	1.64	3.46	1.3
201140_s_at	RAB5C	1.65	3.78	1.52
236565_s_at	LARP6	1.65	3.76	1.51
233255_s_at	BIVM	1.65	3.75	1.5
242442_x_at	TRMT10A	1.65	3.76	1.5
210705_s_at	TRIM5	1.65	3.72	1.48
209031_at	CADM1	1.65	3.7	1.47
201047_x_at	RAB6A	1.65	3.67	1.44
240152_at	240152_at	1.65	3.66	1.44
209444_at	RAP1GDS1	1.65	3.64	1.43
229506_at	PPM1L	1.65	3.64	1.43
1558964_at	FAT3	1.65	3.63	1.42
215081_at	KIAA1024	1.65	3.63	1.42
225970_at	DDHD1	1.65	3.61	1.41
209514_s_at	RAB27A	1.65	3.57	1.38
201288_at	ARHGDIB	1.65	3.55	1.36
219655_at	C7orf10	1.65	3.54	1.36
1570125_at	1570125_at	1.65	3.52	1.34
206662_at	GLRX	1.65	3.5	1.33
1558943_x_at	ZNF765	1.65	3.5	1.32
203020_at	RABGAP1L	1.65	3.48	1.32
204124_at	SLC34A2	1.65	3.49	1.32
222557_at	STMN3	1.65	3.49	1.32
204440_at	CD83	1.66	3.81	1.54
202545_at	PRKCD	1.66	3.8	1.53
205774_at	F12	1.66	3.77	1.51
235989_at	235989_at	1.66	3.77	1.51
218844_at	ACSF2	1.66	3.75	1.5
223628_at	TMEM191A	1.66	3.75	1.5
201906_s_at	CTDSPL	1.66	3.72	1.48
216526_x_at	HLA-C	1.66	3.72	1.48
218248_at	FAM111A	1.66	3.72	1.48
206385_s_at	ANK3	1.66	3.71	1.47
209180_at	RABGGTB	1.66	3.7	1.46
218404_at	SNX10	1.66	3.69	1.46
234351_x_at	TRPS1	1.66	3.69	1.46
226510_at	HEATR5A	1.66	3.67	1.44
227158_at	DTD2	1.66	3.66	1.44
231355_at	CACNG8	1.66	3.65	1.44
209473_at	ENTPD1	1.66	3.65	1.43
211421_s_at	RET	1.66	3.65	1.43
211029_x_at	FGF18	1.66	3.6	1.4
204135_at	FILIP1L	1.66	3.58	1.39
204612_at	PKIA	1.66	3.56	1.37
211287_x_at	CSF2RA	1.66	3.54	1.36
226600_at	TMTC3	1.66	3.53	1.35
218261_at	AP1M2	1.66	3.52	1.34
59697_at	RAB15	1.66	3.52	1.34
209036_s_at	MDH2	1.66	3.47	1.31
211984_at	211984_at	1.67	3.85	1.57
211960_s_at	RAB7A	1.67	3.82	1.55
219247_s_at	ZDHHC14	1.67	3.82	1.55
238445_x_at	MGAT5B	1.67	3.83	1.55
1557411_s_at	SLC25A43	1.67	3.81	1.54
200700_s_at	KDELR2	1.67	3.79	1.53
203167_at	TIMP2	1.67	3.8	1.53
209032_s_at	CADM1	1.67	3.79	1.53
228201_at	ARL13B	1.67	3.77	1.51
212314_at	SEL1L3	1.67	3.73	1.48
200692_s_at	HSPA9	1.67	3.71	1.47
218455_at	NFS1	1.67	3.7	1.46
202124_s_at	TRAK2	1.67	3.66	1.44
202236_s_at	SLC16A1	1.67	3.67	1.44
227534_at	AAED1	1.67	3.66	1.44
219688_at	BBS7	1.67	3.65	1.43
237015_at	237015_at	1.67	3.65	1.43
200655_s_at	200655_s_at	1.67	3.62	1.41
222279_at	HLA-F-AS1	1.67	3.61	1.41
202506_at	SSFA2	1.67	3.6	1.4
242477_at	TTC39B	1.67	3.55	1.37
237593_at	237593_at	1.67	3.55	1.36
217834_s_at	SYNCRIP	1.68	3.85	1.57
1562301_at	C8orf34	1.68	3.83	1.56
202125_s_at	TRAK2	1.68	3.82	1.55
207122_x_at	SULT1A2	1.68	3.83	1.55
226024_at	COMMD1	1.68	3.82	1.55
231982_at	C19orf77	1.68	3.82	1.54
227568_at	HECTD2	1.68	3.79	1.53
235952_at	235952_at	1.68	3.8	1.53
1553422_s_at	RBFOX1	1.68	3.78	1.52
228802_at	RBPMS2	1.68	3.78	1.52
218069_at	DCTPP1	1.68	3.77	1.51
210511_s_at	INHBA	1.68	3.75	1.5
211737_x_at	PTN	1.68	3.75	1.5
227026_at	MPHOSPH8	1.68	3.73	1.48
229893_at	FRMD3	1.68	3.72	1.48
1555962_at	B3GNT7	1.68	3.68	1.45
208961_s_at	KLF6	1.68	3.67	1.45
206687_s_at	PTPN6	1.68	3.67	1.44
1555679_a_at	RTN4IP1	1.68	3.65	1.43
202501_at	MAPRE2	1.68	3.64	1.43
204526_s_at	TBC1D8	1.68	3.63	1.42
211020_at	GCNT2	1.68	3.63	1.42
206528_at	TRPC6	1.68	3.52	1.34
236529_at	SRCRB4D	1.68	3.48	1.31
204342_at	SLC25A24	1.69	3.89	1.6
230025_at	GJD3	1.69	3.89	1.59
217743_s_at	TMEM30A	1.69	3.86	1.58
223171_at	DYM	1.69	3.85	1.57
223696_at	ARSD	1.69	3.84	1.56
226291_at	ALS2	1.69	3.85	1.56
238590_x_at	TMEM107	1.69	3.84	1.56
225036_at	TOMM5	1.69	3.83	1.55
204017_at	KDELR3	1.69	3.8	1.53
203336_s_at	ITGB1BP1	1.69	3.79	1.52
206197_at	NME5	1.69	3.79	1.52
206303_s_at	NUDT4	1.69	3.78	1.52
218194_at	REXO2	1.69	3.76	1.51
226542_at	226542_at	1.69	3.74	1.49
228461_at	SH3RF3	1.69	3.74	1.49
1556555_at	LOC100129461	1.69	3.72	1.48
212586_at	CAST	1.69	3.73	1.48
212144_at	SUN2	1.69	3.69	1.46
221008_s_at	AGXT2L1	1.69	3.69	1.46
241888_at	241888_at	1.69	3.7	1.46
224604_at	C4orf3	1.69	3.67	1.44
202081_at	IER2	1.69	3.64	1.43
212460_at	SPTSSA	1.69	3.65	1.43
226791_at	KIFC2	1.69	3.63	1.42
206033_s_at	DSC3	1.69	3.56	1.37
219987_at	ERVMER34-1	1.69	3.55	1.37
228759_at	CREB3L2	1.69	3.56	1.37
203800_s_at	MRPS14	1.69	3.51	1.34
223786_at	CHST6	1.69	3.49	1.32
222620_s_at	DNAJC1	1.69	3.48	1.31
201904_s_at	CTDSPL	1.7	3.93	1.62
219298_at	ECHDC3	1.7	3.86	1.58
226099_at	ELL2	1.7	3.87	1.58
214597_at	SSTR2	1.7	3.86	1.57
218856_at	TNFRSF21	1.7	3.86	1.57
201797_s_at	VARS	1.7	3.81	1.54
237116_at	LOC646903	1.7	3.76	1.5
232946_s_at	NADSYN1	1.7	3.7	1.46
205493_s_at	DPYSL4	1.7	3.68	1.45
235205_at	OXR1	1.7	3.69	1.45
238480_at	TTC39C	1.7	3.66	1.44
236325_at	KIAA1377	1.7	3.61	1.41
236048_at	LHFPL1	1.7	3.6	1.4
1556037_s_at	HHIP	1.7	3.59	1.39
201323_at	EBNA1BP2	1.7	3.59	1.39
219615_s_at	KCNK5	1.7	3.59	1.39
[truncated: 2,381 more rows]

## Sheet: 1000
1000 µM VPA
ID	symbol	fold change	-log(p-value)	-log(p-value) BY-adjusted
210302_s_at	MAB21L2	0.01	9.34	4.28
1554012_at	RSPO2	0.02	8.81	4.21
238878_at	ARX	0.02	7.56	3.85
219557_s_at	NRIP3	0.03	8.8	4.21
242193_at	LOC100130155	0.03	8.31	4.07
219197_s_at	SCUBE2	0.03	8.15	4
221950_at	EMX2	0.03	7.6	3.87
238661_at	LOC100130155	0.04	8.97	4.28
235795_at	PAX6	0.04	8.43	4.09
221086_s_at	FEZF2	0.04	7.65	3.89
222900_at	NRIP3	0.04	7.56	3.85
233327_at	UBE3D	0.05	8.7	4.19
218870_at	ARHGAP15	0.05	8.11	4
233972_s_at	FEZF2	0.05	7.81	3.96
228658_at	MIAT	0.05	7.72	3.91
237322_at	MIAT	0.06	8.46	4.09
205646_s_at	PAX6	0.06	8	4
230493_at	SHISA2	0.06	8.07	4
243929_at	243929_at	0.06	5.69	2.8
227168_at	MIAT	0.07	7.41	3.78
237435_at	237435_at	0.08	8.19	4
229085_at	LRRC3B	0.08	7.92	3.99
239903_at	TPBG	0.08	7.91	3.99
1554314_at	C6orf141	0.09	8.02	4
1558388_a_at	UG0898H09	0.09	8.04	4
204424_s_at	LMO3	0.09	8.02	4
1556378_a_at	LOC440896	0.09	6.37	3.17
222325_at	222325_at	0.09	5.11	2.44
242128_at	OTX2	0.1	7.38	3.76
220087_at	BCMO1	0.1	6.92	3.47
210303_at	MAB21L2	0.1	6.88	3.46
231731_at	OTX2	0.1	6.75	3.39
243672_at	SALL3	0.1	6.23	3.09
242054_s_at	SIX3	0.11	7.82	3.96
235004_at	RBM24	0.12	6.88	3.46
239556_at	LOC645513	0.12	6.36	3.16
1555801_s_at	ZNF385B	0.12	5.67	2.79
237449_at	SP8	0.12	5.11	2.44
1553447_at	AGBL1	0.13	6.95	3.49
1552520_at	TMEM74	0.13	6.9	3.47
206588_at	DAZL	0.13	6.62	3.32
1555800_at	ZNF385B	0.13	6.55	3.27
1552575_a_at	C6orf141	0.13	6.07	3
221029_s_at	WNT5B	0.13	6	2.96
230785_at	230785_at	0.13	5.01	2.38
1552521_a_at	TMEM74	0.14	7.48	3.82
239230_at	HES5	0.14	6.76	3.39
238755_at	RASSF10	0.14	6.7	3.37
1561101_at	JAKMIP2-AS1	0.14	6.19	3.07
1553202_at	STOX1	0.14	5.34	2.59
210493_s_at	MFAP3L	0.15	7.08	3.57
233202_at	CNTNAP3	0.15	6.7	3.37
209560_s_at	DLK1	0.15	6.55	3.27
236214_at	FAM71F1	0.15	5.09	2.43
243193_at	243193_at	0.15	4.48	2.03
237305_at	237305_at	0.15	4.2	1.85
202219_at	SLC6A8	0.16	6.75	3.39
239280_at	239280_at	0.16	6.72	3.38
233753_at	SCAF4	0.16	6.68	3.35
229435_at	GLIS3	0.16	6.56	3.28
231466_at	FAM71F1	0.16	5.99	2.96
211341_at	POU4F1	0.16	3.83	1.6
206940_s_at	POU4F1	0.16	3.4	1.31
204602_at	DKK1	0.17	7.14	3.6
231800_s_at	DMRT3	0.17	7.02	3.53
237885_at	SOX21-AS1	0.17	6.22	3.08
244045_at	244045_at	0.17	6.19	3.07
229782_at	RMST	0.17	5.62	2.76
1570335_at	1570335_at	0.17	4.61	2.12
244116_at	244116_at	0.18	6.84	3.44
230045_at	CNTN2	0.18	6.54	3.27
1561969_at	ZPLD1	0.18	6.53	3.26
212805_at	PRUNE2	0.18	6.52	3.26
217546_at	MT1M	0.18	6.03	2.97
232847_at	SALL3	0.18	5.2	2.49
244061_at	244061_at	0.18	4.5	2.04
1561895_at	1561895_at	0.18	4.36	1.95
1556911_at	1556911_at	0.19	7.09	3.57
229019_at	ZNF385B	0.19	7.01	3.53
1562848_at	IST1	0.19	6.53	3.26
213913_s_at	TBC1D30	0.19	6.54	3.26
204014_at	DUSP4	0.19	6.46	3.22
229441_at	PRSS23	0.19	6.19	3.07
231898_x_at	SOX2-OT	0.19	5.96	2.94
236202_at	236202_at	0.19	5.91	2.91
230258_at	GLIS3	0.19	5.88	2.9
229378_at	STOX1	0.19	5.62	2.76
232531_at	EMX2OS	0.19	5.51	2.69
232826_at	232826_at	0.19	5.42	2.64
1558387_at	UG0898H09	0.19	4.89	2.3
243416_at	243416_at	0.19	4.89	2.3
230147_at	F2RL2	0.2	6.7	3.37
1556257_at	LOC645513	0.2	6.31	3.13
240269_at	240269_at	0.2	6.04	2.98
232424_at	PRDM16	0.2	5.65	2.77
212427_at	KIAA0368	0.2	5.55	2.71
220519_s_at	LIM2	0.2	5.44	2.65
205699_at	MAP2K6	0.2	5.24	2.52
215483_at	AKAP9	0.2	4.73	2.2
1561195_at	1561195_at	0.2	4	1.72
1560738_at	1560738_at	0.21	6.73	3.38
203476_at	TPBG	0.21	6.62	3.32
212976_at	LRRC8B	0.21	6.06	2.99
230889_at	LOC645321	0.21	5.62	2.76
232606_at	ANK2	0.21	5.16	2.47
221245_s_at	FZD5	0.22	6.29	3.12
1560739_a_at	1560739_a_at	0.22	6.15	3.06
230764_at	230764_at	0.22	6.15	3.06
1564383_s_at	FLJ35934	0.22	5.99	2.95
208345_s_at	POU3F1	0.22	5.72	2.81
236832_at	ADCY10P1	0.22	5.7	2.8
213993_at	SPON1	0.22	5.58	2.73
1569241_a_at	ZNF93	0.22	5.3	2.56
1553411_s_at	SALL3	0.22	4.68	2.16
243691_at	243691_at	0.22	4.46	2.02
1570507_at	SCAF11	0.22	3.74	1.54
1553349_at	ARID2	0.22	3.53	1.4
238488_at	238488_at	0.23	6.64	3.33
240259_at	240259_at	0.23	6.53	3.26
220436_at	LOC441402	0.23	6.41	3.19
226384_at	PPAPDC1B	0.23	6.19	3.07
215108_x_at	TOX3	0.23	6.12	3.04
241962_at	241962_at	0.23	6.11	3.03
207443_at	NR2E1	0.23	6.03	2.97
242007_at	242007_at	0.23	5.99	2.96
214774_x_at	TOX3	0.23	5.97	2.95
1565595_at	1565595_at	0.23	5.89	2.91
226665_at	AHSA2	0.23	5.36	2.6
235555_at	235555_at	0.23	4.9	2.3
1569940_at	SLC6A16	0.23	4.57	2.09
1561341_at	1561341_at	0.23	3.8	1.58
243332_at	243332_at	0.23	3.75	1.54
204663_at	ME3	0.24	6.29	3.12
223121_s_at	SFRP2	0.24	6.26	3.1
206634_at	SIX3	0.24	6.22	3.08
216623_x_at	TOX3	0.24	6.01	2.96
232629_at	PROK2	0.24	5.84	2.88
242239_at	ARL5B-AS1	0.24	5.85	2.88
224772_at	NAV1	0.24	5.7	2.8
241834_at	241834_at	0.24	5.62	2.76
222058_at	RNF130	0.24	4.34	1.94
239545_at	239545_at	0.24	4.22	1.86
236322_at	236322_at	0.24	4.18	1.84
233977_at	GREB1L	0.24	4.07	1.76
1552822_at	TMX3	0.25	6.48	3.24
229302_at	TMEM178A	0.25	6.28	3.11
228792_at	228792_at	0.25	6.18	3.07
223122_s_at	SFRP2	0.25	6.17	3.06
213353_at	ABCA5	0.25	5.98	2.95
1557066_at	LUC7L	0.25	5.92	2.92
226279_at	PRSS23	0.25	5.85	2.88
241853_at	241853_at	0.25	5.85	2.88
1568983_a_at	1568983_a_at	0.25	5.82	2.87
214058_at	MYCL1	0.25	5.43	2.64
244383_at	244383_at	0.25	5.42	2.64
230773_at	ZNF385D	0.25	5.26	2.53
220663_at	IL1RAPL1	0.25	5.15	2.46
205442_at	MFAP3L	0.25	5.08	2.42
239049_at	239049_at	0.25	5.01	2.38
1565975_at	1565975_at	0.25	4.81	2.24
236253_at	ZNF546	0.25	4.8	2.24
1563975_at	RNF130	0.25	4.52	2.05
237472_at	SOX1	0.26	6.21	3.08
224242_at	GALP	0.26	5.98	2.95
202037_s_at	SFRP1	0.26	5.86	2.89
243707_at	243707_at	0.26	5.77	2.84
220360_at	THAP9	0.26	5.77	2.83
213912_at	TBC1D30	0.26	5.53	2.7
1554043_a_at	1554043_a_at	0.26	5.46	2.66
244133_at	USP49	0.26	5.22	2.51
238635_at	C5orf28	0.26	4.91	2.31
231061_at	231061_at	0.26	4.83	2.26
236494_x_at	236494_x_at	0.26	4.78	2.23
241692_at	241692_at	0.26	4.16	1.82
233257_at	233257_at	0.26	4.1	1.78
243546_at	243546_at	0.26	3.96	1.69
232453_at	232453_at	0.26	3.79	1.57
223468_s_at	RGMA	0.27	6.24	3.09
232280_at	SLC25A29	0.27	6.24	3.09
229569_at	229569_at	0.27	6.22	3.08
202708_s_at	HIST2H2BE	0.27	6.18	3.07
228081_at	CCNG2	0.27	6.19	3.07
224774_s_at	NAV1	0.27	6.16	3.06
210220_at	FZD2	0.27	6.11	3.03
206718_at	LMO1	0.27	6.09	3.02
206157_at	PTX3	0.27	5.99	2.96
202458_at	PRSS23	0.27	5.92	2.92
235635_at	ARHGAP5	0.27	5.75	2.83
202035_s_at	SFRP1	0.27	5.62	2.76
242253_at	PPP5D1	0.27	5.5	2.69
231088_at	MORF4L2-AS1	0.27	5.47	2.67
243880_at	GOSR2	0.27	5.43	2.64
238098_at	238098_at	0.27	5.29	2.55
235172_at	235172_at	0.27	5.25	2.53
243996_at	243996_at	0.27	5.17	2.48
1559391_s_at	1559391_s_at	0.27	5.01	2.37
212806_at	PRUNE2	0.27	4.91	2.31
228387_at	LOC100996511	0.27	4.89	2.3
225786_at	HNRNPU-AS1	0.27	4.7	2.17
244691_at	SETD5	0.27	4.7	2.17
1565703_at	SMAD4	0.27	4.65	2.14
230022_at	CLEC18A	0.27	4.36	1.95
1554638_at	ZFYVE16	0.27	3.78	1.56
210492_at	MFAP3L	0.28	6.17	3.06
237291_at	PRORSD1P	0.28	5.97	2.95
220717_at	ADAMTS20	0.28	5.77	2.84
230198_at	230198_at	0.28	5.67	2.78
204914_s_at	SOX11	0.28	5.6	2.75
238129_s_at	FZD2	0.28	5.6	2.74
231979_at	231979_at	0.28	5.56	2.72
224215_s_at	DLL1	0.28	5.49	2.68
1555568_at	GUSBP2	0.28	5.2	2.49
210037_s_at	NOS2	0.28	5.19	2.49
226419_s_at	FLJ44342	0.28	5.09	2.42
243483_at	TRPM8	0.28	4.94	2.33
238595_at	238595_at	0.28	4.84	2.26
241769_at	241769_at	0.28	4.77	2.22
210854_x_at	SLC6A8	0.28	4.73	2.2
202766_s_at	FBN1	0.28	4.65	2.14
238318_at	238318_at	0.28	4.49	2.03
232396_at	232396_at	0.28	4.33	1.93
232797_at	232797_at	0.28	3.77	1.56
1557945_at	TCTE3	0.28	3.7	1.52
1569180_at	1569180_at	0.28	3.55	1.42
1559149_at	1559149_at	0.28	3.43	1.33
213010_at	PRKCDBP	0.29	6.15	3.06
222963_s_at	IL1RAPL1	0.29	6.12	3.03
205659_at	HDAC9	0.29	6.05	2.99
231738_at	PCDHB7	0.29	5.95	2.94
224763_at	224763_at	0.29	5.86	2.89
232061_at	SDK2	0.29	5.77	2.84
203829_at	ELP4	0.29	5.74	2.82
227584_at	NAV1	0.29	5.68	2.79
206306_at	RYR3	0.29	5.57	2.72
214094_at	FUBP1	0.29	5.52	2.7
228529_at	NAA38	0.29	5.53	2.7
202036_s_at	SFRP1	0.29	5.49	2.68
210281_s_at	ZMYM2	0.29	5.29	2.55
228455_at	228455_at	0.29	5.14	2.46
239169_at	RDM1	0.29	5.12	2.45
232207_at	GUSBP4	0.29	5.04	2.4
236153_at	236153_at	0.29	4.97	2.35
237856_at	RAP1GDS1	0.29	4.94	2.33
223588_at	THAP2	0.29	4.84	2.26
235593_at	ZEB2	0.29	4.73	2.19
1556659_at	1556659_at	0.29	4.68	2.16
224508_at	MGC12916	0.29	4.34	1.94
210282_at	ZMYM2	0.29	4.31	1.92
227963_at	227963_at	0.29	4.24	1.87
220576_at	PGAP1	0.29	4.05	1.74
230776_at	RNF157-AS1	0.29	3.81	1.59
243243_at	GPC3	0.29	3.8	1.58
215268_at	KIAA0754	0.29	3.7	1.51
204455_at	204455_at	0.29	3.58	1.43
219820_at	SLC6A16	0.3	6.04	2.98
230395_at	230395_at	0.3	6.01	2.97
231899_at	ZC3H12C	0.3	5.97	2.95
235226_at	CDK19	0.3	5.95	2.93
224507_s_at	MGC12916	0.3	5.72	2.81
230185_at	THAP9	0.3	5.68	2.79
206209_s_at	CA4	0.3	5.63	2.76
206254_at	EGF	0.3	5.6	2.75
210962_s_at	AKAP9	0.3	5.58	2.73
227499_at	FZD3	0.3	5.57	2.73
213721_at	SOX2	0.3	5.49	2.68
204915_s_at	SOX11	0.3	5.43	2.64
213994_s_at	SPON1	0.3	5.42	2.64
1561158_at	1561158_at	0.3	5.31	2.57
226847_at	FST	0.3	5.17	2.47
213661_at	PAMR1	0.3	5.08	2.42
232794_at	LOC153682	0.3	4.57	2.09
238625_at	C1orf168	0.3	4.51	2.05
236314_at	EPM2AIP1	0.3	4.39	1.97
229815_at	TMEM161B-AS1	0.3	4.27	1.89
236059_at	LOC100130428	0.3	4.18	1.83
244655_at	LOC100507311	0.3	4.09	1.78
204015_s_at	DUSP4	0.31	6.01	2.96
230821_at	ZNF148	0.31	6	2.96
235274_at	235274_at	0.31	6	2.96
231449_at	231449_at	0.31	5.96	2.94
213197_at	ASTN1	0.31	5.94	2.93
1556488_s_at	MAATS1	0.31	5.92	2.92
201431_s_at	DPYSL3	0.31	5.91	2.91
226034_at	DUSP4	0.31	5.84	2.88
227449_at	EPHA4	0.31	5.82	2.87
226676_at	ZNF521	0.31	5.68	2.79
1562633_at	RMST	0.31	5.63	2.76
213241_at	PLXNC1	0.31	5.64	2.76
228017_s_at	NKAIN4	0.31	5.62	2.76
236555_at	TRAF3IP2-AS1	0.31	5.61	2.75
217028_at	CXCR4	0.31	5.53	2.7
230148_at	AHSA2	0.31	5.44	2.65
226677_at	ZNF521	0.31	5.43	2.64
213843_x_at	SLC6A8	0.31	5.36	2.6
226972_s_at	CCDC136	0.31	5.36	2.6
204982_at	GIT2	0.31	5.34	2.59
218541_s_at	C8orf4	0.31	5.26	2.54
225627_s_at	CACHD1	0.31	5.11	2.44
241535_at	LOC100292909	0.31	5.08	2.42
206349_at	LGI1	0.31	5.04	2.4
233139_at	233139_at	0.31	4.96	2.34
229672_at	UQCC	0.31	4.88	2.29
220390_at	AGBL2	0.31	4.77	2.22
230809_at	230809_at	0.31	4.76	2.22
238501_at	238501_at	0.31	4.61	2.12
1557828_a_at	C5orf28	0.31	4.59	2.1
228157_at	ZNF207	0.31	4.4	1.98
240143_at	240143_at	0.31	4.01	1.72
231252_at	KANSL1L	0.31	3.94	1.68
226971_at	CCDC136	0.31	3.53	1.4
229879_at	229879_at	0.32	5.93	2.92
210694_s_at	MID1	0.32	5.91	2.91
228948_at	EPHA4	0.32	5.9	2.91
1559510_at	LINC00630	0.32	5.89	2.9
225487_at	TMEM18	0.32	5.75	2.83
212549_at	STAT5B	0.32	5.73	2.82
215071_s_at	HIST1H2AC	0.32	5.73	2.82
230534_at	ZNF678	0.32	5.74	2.82
228885_at	MAMDC2	0.32	5.72	2.81
229374_at	EPHA4	0.32	5.72	2.81
203441_s_at	CDH2	0.32	5.7	2.8
229133_s_at	ZNF397	0.32	5.67	2.78
231953_at	BPTF	0.32	5.55	2.72
209436_at	SPON1	0.32	5.53	2.7
230664_at	H2BFXP	0.32	5.46	2.66
1569315_s_at	LOC100272228	0.32	5.45	2.65
207357_s_at	GALNT10	0.32	5.45	2.65
214409_at	RFPL3S	0.32	5.27	2.54
1560652_at	1560652_at	0.32	5.2	2.49
204948_s_at	FST	0.32	5.17	2.48
226334_s_at	AHSA2	0.32	5.1	2.43
208215_x_at	DRD4	0.32	5.06	2.41
232004_at	HNRNPR	0.32	4.89	2.3
244271_at	244271_at	0.32	4.89	2.3
242120_at	242120_at	0.32	4.77	2.22
1566152_a_at	1566152_a_at	0.32	4.71	2.18
236650_at	236650_at	0.32	4.67	2.15
242518_at	LOC100505648	0.32	4.67	2.15
214102_at	214102_at	0.32	4.53	2.06
239005_at	239005_at	0.32	4.43	1.99
223915_at	BCOR	0.32	4.35	1.94
239937_at	ZNF207	0.32	3.88	1.63
236251_at	236251_at	0.32	3.79	1.57
240545_at	LOC286382	0.32	3.39	1.3
206114_at	EPHA4	0.33	5.8	2.85
229452_at	TMEM88	0.33	5.78	2.84
238114_at	PCMTD1	0.33	5.78	2.84
212468_at	SPAG9	0.33	5.76	2.83
209437_s_at	SPON1	0.33	5.71	2.81
229184_at	CCNT2	0.33	5.72	2.81
225339_at	SPAG9	0.33	5.67	2.78
223569_at	PPAPDC1B	0.33	5.63	2.76
242708_at	242708_at	0.33	5.46	2.66
206843_at	CRYBA4	0.33	5.44	2.65
203562_at	FEZ1	0.33	5.42	2.64
235072_s_at	KIF13A	0.33	5.41	2.63
244014_x_at	244014_x_at	0.33	5.39	2.62
229661_at	SALL4	0.33	5.36	2.6
230067_at	FAM124A	0.33	5.19	2.49
1563614_at	MTBP	0.33	5.14	2.46
244418_at	244418_at	0.33	4.94	2.33
242201_at	PMS2P5	0.33	4.75	2.21
236105_at	ZBTB10	0.33	4.74	2.2
221901_at	KIAA1644	0.33	4.72	2.19
1569311_at	1569311_at	0.33	4.38	1.96
239886_at	239886_at	0.33	4.3	1.91
236697_at	236697_at	0.33	4.06	1.75
232523_at	MEGF10	0.33	4.04	1.74
241996_at	RUFY2	0.33	3.91	1.66
205143_at	NCAN	0.33	3.84	1.61
235190_at	235190_at	0.33	3.84	1.61
243865_x_at	243865_x_at	0.33	3.69	1.51
1569181_x_at	1569181_x_at	0.33	3.56	1.42
239243_at	ZNF638	0.33	3.43	1.33
201372_s_at	CUL3	0.34	5.71	2.81
238227_at	238227_at	0.34	5.73	2.81
1557118_a_at	INTS6-AS1	0.34	5.7	2.8
223472_at	WHSC1	0.34	5.68	2.79
227081_at	DNALI1	0.34	5.67	2.78
239082_at	FZD3	0.34	5.65	2.77
229417_at	229417_at	0.34	5.61	2.75
235556_at	CREBRF	0.34	5.57	2.72
220117_at	ZNF385D	0.34	5.54	2.7
227524_at	FZD3	0.34	5.5	2.69
242523_at	242523_at	0.34	5.48	2.67
1563899_at	LCTL	0.34	5.46	2.66
203440_at	CDH2	0.34	5.47	2.66
219464_at	CA14	0.34	5.41	2.63
220231_at	PPP1R17	0.34	5.27	2.54
236501_at	236501_at	0.34	5.26	2.53
204913_s_at	SOX11	0.34	5.23	2.52
214093_s_at	FUBP1	0.34	5.23	2.51
236500_at	236500_at	0.34	5.22	2.51
203798_s_at	VSNL1	0.34	5.21	2.5
210203_at	CNOT4	0.34	5.19	2.49
232989_s_at	CCDC136	0.34	5.17	2.48
236918_s_at	LRRC34	0.34	5.12	2.44
238472_at	FBXO9	0.34	5.12	2.44
233400_at	233400_at	0.34	5.07	2.42
243009_at	243009_at	0.34	5.08	2.42
226112_at	SGCB	0.34	5.07	2.41
226934_at	CPSF6	0.34	5.07	2.41
1555318_at	HIF3A	0.34	5.04	2.4
203797_at	VSNL1	0.34	5.04	2.4
206326_at	GRP	0.34	4.98	2.36
228494_at	PPP1R9A	0.34	4.92	2.31
65472_at	C2orf68	0.34	4.91	2.31
240006_at	240006_at	0.34	4.8	2.24
239884_at	CADPS	0.34	4.79	2.23
229086_at	C1orf213	0.34	4.56	2.08
1554769_at	ZNF785	0.34	4.35	1.95
215470_at	215470_at	0.34	4.36	1.95
239358_at	239358_at	0.34	4.3	1.91
1556088_at	RPAIN	0.34	4.22	1.86
1555074_a_at	KCNH5	0.34	4.21	1.85
207729_at	CDH9	0.34	4.04	1.74
233241_at	PLK1S1	0.34	3.96	1.69
1559490_at	LRCH3	0.34	3.92	1.66
1557065_at	YLPM1	0.34	3.76	1.55
1561198_at	LOC100506127	0.34	3.57	1.42
244427_at	KIF23	0.34	3.47	1.36
222759_at	SUV420H1	0.35	5.66	2.78
235456_at	235456_at	0.35	5.63	2.76
228038_at	SOX2	0.35	5.5	2.69
1557667_at	1557667_at	0.35	5.46	2.66
215599_at	215599_at	0.35	5.41	2.63
230928_at	230928_at	0.35	5.41	2.63
235422_at	235422_at	0.35	5.36	2.6
229351_at	229351_at	0.35	5.29	2.56
236292_at	RNF130	0.35	5.29	2.55
205206_at	KAL1	0.35	5.25	2.53
1552811_at	WFIKKN1	0.35	5.2	2.49
1565830_at	1565830_at	0.35	5.18	2.48
205505_at	GCNT1	0.35	5.11	2.44
212764_at	ZEB1	0.35	5.09	2.43
202283_at	SERPINF1	0.35	5.02	2.39
206891_at	ACTN3	0.35	5.01	2.38
230904_at	FSD1L	0.35	4.95	2.33
228465_at	228465_at	0.35	4.91	2.31
205041_s_at	205041_s_at	0.35	4.86	2.28
206731_at	CNKSR2	0.35	4.86	2.28
242024_at	242024_at	0.35	4.86	2.27
227368_at	227368_at	0.35	4.8	2.24
200962_at	RPL31	0.35	4.59	2.1
234105_at	234105_at	0.35	4.53	2.06
230293_at	MEAF6	0.35	4.46	2.01
231848_x_at	ZNF207	0.35	4.13	1.8
233083_at	MTHFD2L	0.35	3.85	1.61
242751_at	242751_at	0.35	3.75	1.54
234194_at	234194_at	0.35	3.62	1.46
238593_at	C11orf80	0.35	3.56	1.42
232911_at	ZFP14	0.36	5.62	2.76
230721_at	230721_at	0.36	5.56	2.72
236723_at	236723_at	0.36	5.57	2.72
242292_at	FAM226B	0.36	5.55	2.71
211919_s_at	CXCR4	0.36	5.53	2.7
223784_at	TMEM27	0.36	5.41	2.63
219029_at	C5orf28	0.36	5.39	2.62
228788_at	YPEL1	0.36	5.32	2.58
244490_at	LOC100996511	0.36	5.29	2.55
217594_at	ZCCHC11	0.36	5.14	2.46
231361_at	NLGN1	0.36	5.09	2.43
238902_at	238902_at	0.36	5.06	2.41
227412_at	PPP1R3E	0.36	5	2.37
215169_at	215169_at	0.36	4.97	2.35
236911_at	RIMKLB	0.36	4.95	2.34
239761_at	GCNT1	0.36	4.96	2.34
212177_at	PNISR	0.36	4.94	2.33
229315_at	229315_at	0.36	4.95	2.33
243745_at	243745_at	0.36	4.91	2.31
236917_at	LRRC34	0.36	4.83	2.26
241590_at	241590_at	0.36	4.83	2.26
241972_at	ZNF674-AS1	0.36	4.83	2.26
209220_at	GPC3	0.36	4.81	2.25
230569_at	KIAA1430	0.36	4.82	2.25
239863_at	239863_at	0.36	4.8	2.24
1560775_at	1560775_at	0.36	4.79	2.23
233963_at	H2BFXP	0.36	4.76	2.21
239682_at	239682_at	0.36	4.71	2.18
242176_at	MEF2A	0.36	4.71	2.18
236974_at	236974_at	0.36	4.66	2.15
232052_at	SETD5-AS1	0.36	4.57	2.09
1562497_at	1562497_at	0.36	4.46	2.01
238069_at	238069_at	0.36	4.43	1.99
236004_at	236004_at	0.36	4.39	1.97
214012_at	ERAP1	0.36	4.36	1.95
229141_at	229141_at	0.36	4.33	1.93
214731_at	214731_at	0.36	4.21	1.85
240174_at	240174_at	0.36	4.16	1.82
242894_at	242894_at	0.36	3.84	1.61
1569540_at	1569540_at	0.36	3.81	1.59
233832_at	233832_at	0.36	3.6	1.44
215012_at	ZNF451	0.36	3.56	1.42
217671_at	DSERG1	0.36	3.51	1.38
233039_at	233039_at	0.36	3.44	1.33
231484_at	231484_at	0.36	3.41	1.31
228584_at	SGCB	0.37	5.49	2.68
227505_at	227505_at	0.37	5.45	2.65
204153_s_at	MFNG	0.37	5.42	2.64
237859_at	237859_at	0.37	5.42	2.64
227059_at	GPC6	0.37	5.39	2.62
227162_at	ZBTB26	0.37	5.33	2.58
205132_at	ACTC1	0.37	5.22	2.51
228216_at	228216_at	0.37	5.19	2.49
203868_s_at	VCAM1	0.37	5.14	2.46
244156_at	244156_at	0.37	5.12	2.45
239649_at	239649_at	0.37	5.1	2.43
231470_at	LOC400680	0.37	4.94	2.33
227361_at	HS3ST3B1	0.37	4.87	2.28
236165_at	MSL3	0.37	4.86	2.28
227996_at	FARP1	0.37	4.83	2.26
219302_s_at	CNTNAP2	0.37	4.77	2.22
227074_at	LOC100131564	0.37	4.76	2.22
242305_at	LOC645513	0.37	4.6	2.11
202765_s_at	FBN1	0.37	4.56	2.09
210875_s_at	ZEB1	0.37	4.56	2.08
215259_s_at	CADM4	0.37	4.52	2.05
1559283_a_at	CNPY1	0.37	4.45	2.01
242343_x_at	242343_x_at	0.37	4.33	1.93
242986_at	NAV1	0.37	4.29	1.9
242829_x_at	242829_x_at	0.37	4.16	1.82
228393_s_at	ZNF302	0.37	4.12	1.79
211559_s_at	CCNG2	0.37	4.02	1.72
1557438_at	1557438_at	0.37	3.97	1.7
228392_at	ZNF302	0.37	3.95	1.68
1553400_a_at	CRHR1-IT1	0.37	3.83	1.6
238455_at	238455_at	0.37	3.84	1.6
243092_at	PAN3-AS1	0.37	3.83	1.6
239014_at	CCAR1	0.37	3.81	1.59
232837_at	KIF13A	0.37	3.77	1.56
1556989_at	1556989_at	0.37	3.75	1.54
239735_at	239735_at	0.37	3.56	1.42
236613_at	RBM25	0.37	3.53	1.4
238875_at	238875_at	0.37	3.47	1.35
209197_at	SYT11	0.38	5.43	2.64
216902_s_at	216902_s_at	0.38	5.44	2.64
236270_at	NFATC4	0.38	5.43	2.64
52837_at	KIAA1644	0.38	5.42	2.64
230939_at	LOC100996457	0.38	5.41	2.63
224765_at	MSL1	0.38	5.33	2.59
228185_at	ZNF25	0.38	5.33	2.59
238252_at	238252_at	0.38	5.31	2.57
235876_at	TMEM218	0.38	5.27	2.54
231142_at	231142_at	0.38	5.19	2.49
215307_at	ZNF529	0.38	5.18	2.48
212758_s_at	ZEB1	0.38	5.14	2.46
206960_at	LPAR4	0.38	5.13	2.45
227504_s_at	227504_s_at	0.38	5.13	2.45
239636_at	MCF2L	0.38	5.09	2.43
228927_at	ZNF397	0.38	5.07	2.42
232395_x_at	AGBL3	0.38	5.05	2.4
1558293_at	KIAA1107	0.38	4.98	2.35
239699_s_at	239699_s_at	0.38	4.92	2.31
1553099_at	TIGD1	0.38	4.81	2.25
231952_at	231952_at	0.38	4.65	2.14
232156_at	232156_at	0.38	4.65	2.14
241017_at	241017_at	0.38	4.56	2.08
1556160_a_at	1556160_a_at	0.38	4.47	2.02
221879_at	CALML4	0.38	4.4	1.98
239384_at	FLJ44342	0.38	4.4	1.98
238620_at	238620_at	0.38	4.39	1.97
242563_at	242563_at	0.38	4.37	1.95
214500_at	H2AFY	0.38	4.22	1.86
235540_at	GNRH1	0.38	4.17	1.83
224771_at	NAV1	0.38	4.16	1.82
221088_s_at	PPP1R9A	0.38	4.12	1.8
238951_at	238951_at	0.38	4.11	1.79
212875_s_at	C2CD2	0.38	4.06	1.75
239130_at	239130_at	0.38	3.96	1.69
230292_at	230292_at	0.38	3.69	1.51
224770_s_at	NAV1	0.38	3.68	1.5
237444_at	KIF13A	0.38	3.64	1.48
236502_at	236502_at	0.38	3.63	1.46
237075_at	237075_at	0.39	5.35	2.6
225975_at	PCDH18	0.39	5.35	2.59
240317_at	PCDHB4	0.39	5.34	2.59
244008_at	PARP8	0.39	5.35	2.59
1555388_s_at	SNX25	0.39	5.31	2.57
210409_at	MLLT4-AS1	0.39	5.3	2.57
1569129_s_at	C3orf38	0.39	5.3	2.56
228018_at	NKAIN4	0.39	5.26	2.54
238115_at	DNAJC18	0.39	5.27	2.54
215306_at	215306_at	0.39	5.25	2.53
218638_s_at	218638_s_at	0.39	5.25	2.53
235697_at	235697_at	0.39	5.25	2.53
239951_at	239951_at	0.39	5.25	2.53
244454_at	244454_at	0.39	5.2	2.49
235634_at	PURG	0.39	5.17	2.48
226096_at	FNDC5	0.39	5.16	2.47
226611_s_at	CENPV	0.39	5.16	2.47
236321_at	FAM200B	0.39	5.14	2.46
213145_at	FBXL14	0.39	5.12	2.45
242620_at	242620_at	0.39	5.1	2.43
224800_at	WDFY1	0.39	5.09	2.42
244110_at	MLL	0.39	5.07	2.42
239024_at	ZNF148	0.39	5.06	2.41
230519_at	FAM124A	0.39	5.04	2.4
1558922_at	1558922_at	0.39	4.97	2.35
224370_s_at	CAPS2	0.39	4.96	2.34
209806_at	HIST1H2BK	0.39	4.94	2.33
235318_at	FBN1	0.39	4.91	2.31
239278_at	239278_at	0.39	4.87	2.28
229571_at	229571_at	0.39	4.86	2.27
1559292_s_at	LINC00032	0.39	4.83	2.26
1561319_at	OTX2-AS1	0.39	4.83	2.26
229287_at	PCNX	0.39	4.84	2.26
1552327_at	ARMCX4	0.39	4.79	2.23
239715_at	239715_at	0.39	4.76	2.22
242358_at	LOC100506451	0.39	4.74	2.2
229491_at	SLC9B2	0.39	4.71	2.18
230906_at	GALNT10	0.39	4.67	2.16
222784_at	SMOC1	0.39	4.66	2.15
243010_at	MSI2	0.39	4.64	2.14
214250_at	NUMA1	0.39	4.63	2.13
238785_at	238785_at	0.39	4.63	2.13
213722_at	SOX2	0.39	4.57	2.09
221213_s_at	ZNF280D	0.39	4.51	2.05
229111_at	229111_at	0.39	4.5	2.04
1556414_at	LINC00515	0.39	4.44	2
235271_s_at	ZNF397	0.39	4.4	1.98
219871_at	FLJ13197	0.39	4.38	1.96
1562955_at	1562955_at	0.39	4.3	1.91
204310_s_at	NPR2	0.39	4.27	1.89
235959_at	235959_at	0.39	4.27	1.89
215592_at	215592_at	0.39	4.21	1.85
236408_at	236408_at	0.39	4.21	1.85
226316_at	RBM26	0.39	4	1.72
214633_at	SOX3	0.39	3.99	1.71
237301_at	237301_at	0.39	3.99	1.71
224325_at	FZD8	0.39	3.85	1.62
1552867_at	1552867_at	0.39	3.75	1.54
205121_at	SGCB	0.39	3.67	1.49
239552_at	VWDE	0.39	3.61	1.45
229866_at	STK32A	0.39	3.45	1.34
213170_at	GPX7	0.4	5.26	2.54
209726_at	CA11	0.4	5.24	2.52
225977_at	PCDH18	0.4	5.23	2.52
232576_at	232576_at	0.4	5.24	2.52
219314_s_at	ZNF219	0.4	5.19	2.49
239505_at	239505_at	0.4	5.13	2.45
242087_x_at	MFI2-AS1	0.4	5.1	2.43
226610_at	CENPV	0.4	5.06	2.41
1554507_at	NAALAD2	0.4	5.05	2.4
227708_at	EEF1A1	0.4	5.04	2.4
235184_at	AEBP2	0.4	5.05	2.4
202686_s_at	AXL	0.4	5.03	2.39
202769_at	CCNG2	0.4	5.03	2.39
212179_at	PNISR	0.4	5.02	2.39
220302_at	MAK	0.4	5	2.37
238081_at	WDFY3-AS2	0.4	5	2.37
1569290_s_at	GRIA3	0.4	4.96	2.34
219522_at	FJX1	0.4	4.96	2.34
204037_at	LPAR1	0.4	4.94	2.33
224574_at	224574_at	0.4	4.95	2.33
214790_at	SENP6	0.4	4.93	2.32
204671_s_at	ANKRD6	0.4	4.91	2.31
210630_s_at	RAD52	0.4	4.89	2.3
1560859_at	1560859_at	0.4	4.84	2.26
229016_s_at	TRERF1	0.4	4.83	2.26
231312_at	231312_at	0.4	4.83	2.26
1552296_at	BEST4	0.4	4.79	2.23
1554743_x_at	PMS1	0.4	4.77	2.22
216218_s_at	PLCL2	0.4	4.76	2.22
243264_s_at	243264_s_at	0.4	4.76	2.22
242586_at	FSD1L	0.4	4.74	2.2
203729_at	EMP3	0.4	4.72	2.19
244360_at	FBXL17	0.4	4.7	2.17
210880_s_at	EFS	0.4	4.64	2.14
235500_at	HNRNPC	0.4	4.64	2.14
223552_at	LRRC4	0.4	4.63	2.13
219383_at	PRR5L	0.4	4.54	2.07
235831_at	235831_at	0.4	4.39	1.97
213267_at	DOPEY1	0.4	4.28	1.9
236668_at	236668_at	0.4	4.26	1.89
214393_at	RND2	0.4	4.24	1.87
220546_at	MLL	0.4	4.24	1.87
235494_at	LSAMP	0.4	4.09	1.77
235315_at	TSC22D1	0.4	4.07	1.76
1554636_at	1554636_at	0.4	3.91	1.65
1553292_s_at	SGK494	0.4	3.88	1.63
1560906_at	1560906_at	0.4	3.74	1.54
242576_x_at	242576_x_at	0.4	3.72	1.53
1560274_at	WTAP	0.4	3.64	1.48
219232_s_at	EGLN3	0.4	3.61	1.45
234103_at	KCNT2	0.4	3.6	1.44
1554248_at	ZNF638	0.4	3.54	1.41
239129_at	239129_at	0.4	3.38	1.3
204759_at	RCBTB2	0.41	5.18	2.48
209201_x_at	CXCR4	0.41	5.09	2.43
226392_at	RASA2	0.41	5.1	2.43
1554479_a_at	CARD8	0.41	5.07	2.42
213776_at	LOC157562	0.41	5.08	2.42
213283_s_at	SALL2	0.41	5	2.37
224804_s_at	FAM219B	0.41	4.94	2.33
243629_x_at	MFI2-AS1	0.41	4.92	2.31
235304_at	LOC100507486	0.41	4.88	2.29
232412_at	FBXL20	0.41	4.82	2.25
213856_at	CD47	0.41	4.81	2.24
212176_at	PNISR	0.41	4.76	2.21
228326_at	WDR27	0.41	4.75	2.21
1554328_at	STXBP4	0.41	4.72	2.19
1554609_at	LOC100287896	0.41	4.7	2.17
1556338_at	1556338_at	0.41	4.67	2.15
242470_at	EID2B	0.41	4.65	2.14
1558115_at	RECK	0.41	4.63	2.13
221012_s_at	TRIM8	0.41	4.61	2.11
228412_at	LOC643072	0.41	4.61	2.11
1556187_at	ZNF555	0.41	4.56	2.09
1556035_s_at	ZNF207	0.41	4.53	2.06
210381_s_at	CCKBR	0.41	4.49	2.04
241851_x_at	LOC100130429	0.41	4.42	1.99
218113_at	TMEM2	0.41	4.4	1.98
219945_at	DDX25	0.41	4.4	1.98
230818_at	230818_at	0.41	4.4	1.98
241818_at	241818_at	0.41	4.37	1.96
203845_at	KAT2B	0.41	4.28	1.9
1557402_at	1557402_at	0.41	4.27	1.89
207345_at	FST	0.41	4.25	1.88
236124_at	LOC153546	0.41	4.22	1.86
232998_at	TIGD4	0.41	4.21	1.85
229454_at	BCLAF1	0.41	4.08	1.77
211006_s_at	KCNB1	0.41	3.95	1.68
236196_at	236196_at	0.41	3.94	1.68
239621_at	239621_at	0.41	3.66	1.49
1557166_at	PDCD4	0.41	3.65	1.48
215717_s_at	FBN2	0.41	3.65	1.48
226412_at	PNISR	0.41	3.63	1.47
229765_at	ZNF207	0.41	3.49	1.37
222214_at	222214_at	0.41	3.45	1.34
239679_at	239679_at	0.41	3.41	1.31
212991_at	FBXO9	0.42	5.14	2.46
225159_s_at	ELK4	0.42	5.13	2.45
227610_at	TSPAN11	0.42	5.09	2.43
235846_at	235846_at	0.42	5.1	2.43
210222_s_at	RTN1	0.42	5.07	2.42
215029_at	215029_at	0.42	5.05	2.41
223568_s_at	PPAPDC1B	0.42	5.06	2.41
228174_at	SCAI	0.42	5.07	2.41
226588_at	CWC22	0.42	5.05	2.4
230380_at	THAP2	0.42	5.02	2.38
242272_at	ZNF785	0.42	5.01	2.38
236297_at	236297_at	0.42	5	2.37
220495_s_at	TXNDC15	0.42	4.99	2.36
235164_at	ZNF25	0.42	4.98	2.35
229321_s_at	229321_s_at	0.42	4.93	2.32
235124_at	LOC645212	0.42	4.88	2.29
1558474_at	1558474_at	0.42	4.84	2.26
1570014_at	1570014_at	0.42	4.83	2.26
230296_at	C16orf52	0.42	4.83	2.26
239443_at	PCDHB6	0.42	4.79	2.24
239843_at	RIT1	0.42	4.78	2.23
229246_at	FLJ44342	0.42	4.71	2.18
227943_at	227943_at	0.42	4.68	2.16
228826_at	BZRAP1-AS1	0.42	4.65	2.14
202770_s_at	CCNG2	0.42	4.59	2.1
224773_at	NAV1	0.42	4.47	2.02
219683_at	FZD3	0.42	4.42	1.99
230477_at	PARD6G-AS1	0.42	4.42	1.99
233068_at	233068_at	0.42	4.38	1.96
236032_at	236032_at	0.42	4.37	1.96
233214_at	233214_at	0.42	4.36	1.95
1555560_at	UGGT2	0.42	4.3	1.91
206956_at	206956_at	0.42	4.28	1.9
227448_at	ARGLU1	0.42	4.28	1.9
223520_s_at	KIF13A	0.42	4.26	1.88
235664_at	235664_at	0.42	4.21	1.85
1552684_a_at	SENP8	0.42	4.17	1.83
237265_at	237265_at	0.42	4.17	1.83
1554780_a_at	PHTF2	0.42	4.16	1.82
241401_at	WDFY3-AS2	0.42	4.15	1.81
243049_at	243049_at	0.42	4.13	1.8
1562957_at	1562957_at	0.42	4.07	1.76
238612_at	238612_at	0.42	4.08	1.76
233113_at	ADAMTS9-AS2	0.42	4.06	1.75
241863_x_at	241863_x_at	0.42	4.02	1.73
233985_x_at	PPP1R9A	0.42	3.98	1.71
1565743_at	1565743_at	0.42	3.93	1.67
1564139_at	A2M-AS1	0.42	3.87	1.63
241627_x_at	ARHGEF40	0.42	3.83	1.6
214197_s_at	SETDB1	0.42	3.77	1.56
219415_at	TTYH1	0.42	3.7	1.51
215469_at	215469_at	0.42	3.67	1.49
240170_at	240170_at	0.42	3.62	1.46
209618_at	CTNND2	0.42	3.55	1.41
229206_at	229206_at	0.42	3.39	1.3
233187_s_at	233187_s_at	0.43	5.08	2.42
205120_s_at	SGCB	0.43	5.06	2.41
225735_at	ANKRD50	0.43	5.07	2.41
223794_at	ARMC4	0.43	5.02	2.38
232734_at	TTC23	0.43	5	2.37
215286_s_at	PHTF2	0.43	4.97	2.35
225507_at	PNISR	0.43	4.98	2.35
219506_at	C1orf54	0.43	4.96	2.34
221878_at	C2orf68	0.43	4.91	2.31
212851_at	DCUN1D4	0.43	4.89	2.3
210867_at	CNOT4	0.43	4.88	2.29
220751_s_at	C5orf4	0.43	4.85	2.27
232632_at	232632_at	0.43	4.86	2.27
223132_s_at	TRIM8	0.43	4.84	2.26
228765_at	GTF2IRD2	0.43	4.83	2.26
236219_at	SLC35G1	0.43	4.84	2.26
227351_at	C16orf52	0.43	4.82	2.25
244872_at	RBBP4	0.43	4.79	2.24
225486_at	ARID2	0.43	4.78	2.23
1561906_at	1561906_at	0.43	4.69	2.16
225062_at	LOC389831	0.43	4.68	2.16
1561687_a_at	ZNF382	0.43	4.67	2.15
204121_at	GADD45G	0.43	4.66	2.15
205571_at	LIPT1	0.43	4.66	2.15
230079_at	ST7L	0.43	4.66	2.15
225806_at	AJUBA	0.43	4.59	2.1
232600_at	232600_at	0.43	4.59	2.1
232914_s_at	SYTL2	0.43	4.59	2.1
233530_at	SDCBP2-AS1	0.43	4.58	2.1
235829_at	CAHM	0.43	4.56	2.08
1557363_a_at	PHIP	0.43	4.53	2.06
230154_at	WAC	0.43	4.53	2.06
220887_at	CCDC177	0.43	4.51	2.05
240926_at	LRCH3	0.43	4.52	2.05
226512_at	ZMYM2	0.43	4.5	2.04
209883_at	GLT25D2	0.43	4.48	2.03
235939_at	235939_at	0.43	4.46	2.02
244389_at	TLK1	0.43	4.44	2.01
212978_at	LRRC8B	0.43	4.42	1.99
224767_at	224767_at	0.43	4.4	1.98
217593_at	ZSCAN18	0.43	4.32	1.93
235547_at	N4BP2L2	0.43	4.33	1.93
231569_at	TMEM31	0.43	4.26	1.89
1559524_at	1559524_at	0.43	4.25	1.88
223494_at	MGEA5	0.43	4.25	1.88
240101_at	240101_at	0.43	4.26	1.88
220770_s_at	C5orf54	0.43	4.2	1.85
221768_at	221768_at	0.43	4.17	1.83
205647_at	RAD52	0.43	4.14	1.81
236343_at	236343_at	0.43	4.14	1.81
228023_x_at	228023_x_at	0.43	4.13	1.8
222306_at	222306_at	0.43	4.02	1.73
1565620_at	AGAP4	0.43	4.01	1.72
217653_x_at	217653_x_at	0.43	4.02	1.72
232784_at	232784_at	0.43	3.99	1.71
235288_at	235288_at	0.43	3.99	1.71
243336_at	LOC100132292	0.43	3.97	1.69
244242_at	244242_at	0.43	3.96	1.69
231471_at	231471_at	0.43	3.94	1.68
242210_at	ZNF24	0.43	3.95	1.68
223843_at	SCARA3	0.43	3.94	1.67
231964_at	BICD1	0.43	3.91	1.66
243612_at	NSD1	0.43	3.89	1.64
225046_at	LOC389831	0.43	3.86	1.62
205251_at	PER2	0.43	3.83	1.6
241453_at	PTK2	0.43	3.83	1.6
232823_at	232823_at	0.43	3.78	1.57
214016_s_at	SFPQ	0.43	3.66	1.49
220296_at	GALNT10	0.43	3.66	1.49
241829_at	FAM124A	0.43	3.59	1.44
236316_at	FAM3C	0.43	3.56	1.42
1561760_s_at	LOC645513	0.43	3.55	1.41
1553750_a_at	FAM76B	0.43	3.5	1.38
229706_at	TCERG1	0.43	3.48	1.36
223802_s_at	RBBP6	0.43	3.38	1.3
232696_at	232696_at	0.43	3.38	1.3
226722_at	FAM20C	0.44	4.96	2.34
228296_at	YPEL1	0.44	4.92	2.32
240445_at	240445_at	0.44	4.93	2.32
1554108_at	1554108_at	0.44	4.91	2.31
222819_at	CTPS2	0.44	4.92	2.31
205839_s_at	BZRAP1	0.44	4.86	2.28
231967_at	PHF20L1	0.44	4.87	2.28
204400_at	EFS	0.44	4.85	2.27
209705_at	MTF2	0.44	4.83	2.26
206053_at	ZNF510	0.44	4.81	2.25
224219_s_at	TRPC4	0.44	4.82	2.25
227948_at	FGD4	0.44	4.82	2.25
210110_x_at	HNRNPH3	0.44	4.81	2.24
227979_at	RBM4	0.44	4.79	2.24
231325_at	UNC5D	0.44	4.8	2.24
212855_at	DCUN1D4	0.44	4.79	2.23
219342_at	CASD1	0.44	4.78	2.23
1553764_a_at	AJUBA	0.44	4.76	2.21
202136_at	ZMYND11	0.44	4.75	2.21
224172_at	224172_at	0.44	4.72	2.19
222434_at	ENAH	0.44	4.63	2.13
235960_at	FXR1	0.44	4.62	2.12
244517_x_at	244517_x_at	0.44	4.55	2.08
58780_s_at	ARHGEF40	0.44	4.51	2.05
225839_at	RBM33	0.44	4.4	1.98
241790_at	241790_at	0.44	4.31	1.92
228032_s_at	DENND1B	0.44	4.28	1.9
241774_at	FLJ31306	0.44	4.24	1.87
204088_at	P2RX4	0.44	4.2	1.85
230942_at	CMTM5	0.44	4.17	1.83
238121_at	GK5	0.44	4.16	1.82
209395_at	CHI3L1	0.44	4.14	1.81
230076_at	PITPNM3	0.44	4.13	1.8
235654_at	TMEM218	0.44	4.11	1.79
1559856_s_at	MLL	0.44	4.1	1.78
1557059_at	LOC254128	0.44	4.05	1.75
242900_at	ALG10B	0.44	3.98	1.7
222350_at	222350_at	0.44	3.95	1.68
244450_at	244450_at	0.44	3.9	1.65
1556339_a_at	1556339_a_at	0.44	3.83	1.6
240713_s_at	240713_s_at	0.44	3.74	1.54
223717_s_at	ACRBP	0.44	3.73	1.53
220021_at	TMC7	0.44	3.68	1.5
226164_x_at	RIMKLB	0.44	3.66	1.49
230056_at	BPTF	0.44	3.67	1.49
233730_at	FAM135A	0.44	3.66	1.49
222380_s_at	PDCD6	0.44	3.65	1.48
1559535_s_at	LOC100996419	0.44	3.57	1.42
1557081_at	RBM25	0.44	3.52	1.39
240146_at	240146_at	0.44	3.39	1.3
235473_at	235473_at	0.45	4.89	2.3
213309_at	PLCL2	0.45	4.86	2.28
225595_at	CREBZF	0.45	4.86	2.28
228349_at	KIAA1958	0.45	4.87	2.28
235283_at	INTS6	0.45	4.86	2.28
227982_at	SEPSECS	0.45	4.85	2.27
215731_s_at	MPHOSPH9	0.45	4.84	2.26
1559763_at	ZC3H12C	0.45	4.82	2.25
227769_at	GPR27	0.45	4.81	2.25
244198_at	RANBP17	0.45	4.81	2.25
243617_at	ZNF827	0.45	4.8	2.24
224938_at	NUFIP2	0.45	4.79	2.23
235640_at	235640_at	0.45	4.78	2.23
242096_at	242096_at	0.45	4.79	2.23
210588_x_at	HNRNPH3	0.45	4.77	2.22
225272_at	SAT2	0.45	4.76	2.21
242974_at	CD47	0.45	4.75	2.21
219505_at	CECR1	0.45	4.74	2.2
205109_s_at	ARHGEF4	0.45	4.72	2.19
218325_s_at	DIDO1	0.45	4.73	2.19
211955_at	IPO5	0.45	4.68	2.16
226156_at	AKT2	0.45	4.68	2.16
227408_s_at	SNX25	0.45	4.67	2.16
229317_at	KPNA5	0.45	4.67	2.16
1558102_at	1558102_at	0.45	4.66	2.15
230559_x_at	FGD4	0.45	4.63	2.13
64408_s_at	CALML4	0.45	4.62	2.13
203485_at	RTN1	0.45	4.61	2.11
243347_at	243347_at	0.45	4.6	2.11
238983_at	NSUN7	0.45	4.59	2.1
214997_at	SCAI	0.45	4.57	2.09
236164_at	FLJ10038	0.45	4.55	2.08
227502_at	227502_at	0.45	4.55	2.07
227339_at	RGMB	0.45	4.53	2.06
209285_s_at	FAM208A	0.45	4.51	2.05
224525_s_at	OLA1	0.45	4.47	2.02
204469_at	PTPRZ1	0.45	4.46	2.01
209403_at	209403_at	0.45	4.45	2.01
1556062_at	RPP30	0.45	4.4	1.98
226192_at	AR	0.45	4.41	1.98
205481_at	ADORA1	0.45	4.39	1.97
1554348_s_at	CDKN2AIPNL	0.45	4.31	1.92
213326_at	VAMP1	0.45	4.32	1.92
225496_s_at	SYTL2	0.45	4.32	1.92
239390_at	GTDC1	0.45	4.3	1.91
212905_at	CSTF2T	0.45	4.27	1.89
235268_at	235268_at	0.45	4.26	1.89
221264_s_at	TARDBP	0.45	4.25	1.88
222273_at	PAPOLG	0.45	4.25	1.88
222016_s_at	ZSCAN31	0.45	4.22	1.86
242418_at	C2orf27A	0.45	4.18	1.83
219174_at	IFT74	0.45	4.15	1.82
1554686_at	STAU2	0.45	4.13	1.8
231954_at	DKFZP434I0714	0.45	4.13	1.8
1558778_s_at	MKL2	0.45	4.1	1.79
236520_at	SDCBP2-AS1	0.45	4.09	1.77
243368_at	243368_at	0.45	4.08	1.77
227192_at	PRRT2	0.45	4.07	1.76
232710_at	232710_at	0.45	4.06	1.75
230129_at	PSTK	0.45	4	1.72
236092_at	236092_at	0.45	3.98	1.7
227575_s_at	NRDE2	0.45	3.96	1.69
242766_at	242766_at	0.45	3.94	1.68
235428_at	LOC100507316	0.45	3.9	1.65
233309_at	233309_at	0.45	3.89	1.64
243322_at	243322_at	0.45	3.89	1.64
236664_at	AKT2	0.45	3.87	1.63
235902_at	235902_at	0.45	3.84	1.61
210631_at	NF1	0.45	3.8	1.58
215554_at	GPLD1	0.45	3.73	1.53
232758_s_at	232758_s_at	0.45	3.62	1.46
231540_at	LOC100130691	0.45	3.53	1.4
236916_at	236916_at	0.45	3.53	1.4
230963_at	EMX2OS	0.45	3.44	1.33
207127_s_at	HNRNPH3	0.46	4.78	2.22
208036_at	OPN1SW	0.46	4.76	2.22
232454_at	232454_at	0.46	4.77	2.22
1557383_a_at	1557383_a_at	0.46	4.75	2.21
226563_at	SMAD2	0.46	4.75	2.21
214202_at	214202_at	0.46	4.73	2.19
225886_at	DDX5	0.46	4.71	2.18
230589_at	TRAF3IP2-AS1	0.46	4.71	2.18
231864_at	ZNF33A	0.46	4.66	2.15
1556964_s_at	1556964_s_at	0.46	4.65	2.14
200815_s_at	PAFAH1B1	0.46	4.65	2.14
205893_at	NLGN1	0.46	4.65	2.14
225706_at	GLCCI1	0.46	4.65	2.14
224755_at	TM9SF3	0.46	4.62	2.13
235224_s_at	CAND1	0.46	4.6	2.11
232105_at	232105_at	0.46	4.59	2.1
241825_at	TYW5	0.46	4.58	2.09
1553696_s_at	ZNF569	0.46	4.56	2.08
231110_at	231110_at	0.46	4.56	2.08
215812_s_at	215812_s_at	0.46	4.5	2.04
1562053_at	1562053_at	0.46	4.46	2.02
215102_at	DPY19L1P1	0.46	4.46	2.02
226458_at	226458_at	0.46	4.45	2.01
228999_at	CHD2	0.46	4.45	2.01
219603_s_at	ZNF226	0.46	4.42	1.99
234326_at	234326_at	0.46	4.4	1.98
1558719_s_at	RPAIN	0.46	4.36	1.95
220474_at	SLC25A21	0.46	4.32	1.92
225700_at	GLCCI1	0.46	4.29	1.91
1557044_at	LINC00665	0.46	4.27	1.89
1566783_at	1566783_at	0.46	4.27	1.89
210069_at	210069_at	0.46	4.21	1.85
1559964_at	FLJ38717	0.46	4.18	1.84
222847_s_at	EGLN3	0.46	4.17	1.83
239725_at	PGAP1	0.46	4.16	1.82
212062_at	ATP9A	0.46	4.12	1.8
1566191_at	SUZ12	0.46	4.11	1.79
210567_s_at	SKP2	0.46	4.01	1.72
203902_at	HEPH	0.46	3.98	1.7
215024_at	CCZ1B	0.46	3.91	1.65
226441_at	MAP3K2	0.46	3.9	1.65
220223_at	ATAD5	0.46	3.86	1.62
228983_at	228983_at	0.46	3.86	1.62
239537_at	ST8SIA2	0.46	3.85	1.61
1557630_s_at	1557630_s_at	0.46	3.83	1.6
219632_s_at	219632_s_at	0.46	3.84	1.6
222217_s_at	SLC27A3	0.46	3.82	1.6
235526_at	235526_at	0.46	3.81	1.59
210306_at	L3MBTL1	0.46	3.79	1.57
238119_at	238119_at	0.46	3.52	1.4
244679_at	244679_at	0.46	3.53	1.4
229272_at	FNBP4	0.46	3.49	1.37
227835_at	LOC389831	0.47	4.74	2.2
207417_s_at	207417_s_at	0.47	4.73	2.19
1569150_x_at	PDLIM7	0.47	4.67	2.15
1556195_a_at	1556195_a_at	0.47	4.65	2.14
1558103_a_at	1558103_a_at	0.47	4.64	2.14
221761_at	ADSS	0.47	4.64	2.14
221911_at	ETV1	0.47	4.65	2.14
236236_at	WNK3	0.47	4.61	2.11
238761_at	ELK4	0.47	4.6	2.11
237448_at	237448_at	0.47	4.58	2.1
238456_at	LOC100289230	0.47	4.58	2.1
223348_x_at	MUM1	0.47	4.56	2.08
217627_at	ZNF573	0.47	4.53	2.06
244222_at	244222_at	0.47	4.51	2.05
205288_at	CDC14A	0.47	4.48	2.03
244444_at	PKD1L2	0.47	4.48	2.03
232282_at	WNK3	0.47	4.47	2.02
235520_at	ZNF280C	0.47	4.47	2.02
205083_at	AOX1	0.47	4.45	2.01
225191_at	CIRBP	0.47	4.44	2.01
202304_at	FNDC3A	0.47	4.43	2
211057_at	ROR1	0.47	4.42	1.99
218972_at	TTC17	0.47	4.4	1.98
221290_s_at	MUM1	0.47	4.41	1.98
212853_at	DCUN1D4	0.47	4.38	1.97
220817_at	TRPC4	0.47	4.39	1.97
226713_at	CCDC50	0.47	4.38	1.97
209153_s_at	TCF3	0.47	4.34	1.94
223162_s_at	KIAA1147	0.47	4.34	1.94
228287_at	ING5	0.47	4.35	1.94
235780_at	PRKACB	0.47	4.35	1.94
238154_at	CEP70	0.47	4.34	1.93
204078_at	LEPREL4	0.47	4.31	1.92
223985_at	FSD1L	0.47	4.31	1.92
239034_at	CXorf24	0.47	4.29	1.91
219696_at	DENND1B	0.47	4.27	1.89
239050_s_at	239050_s_at	0.47	4.27	1.89
226931_at	TMTC1	0.47	4.25	1.88
1569106_s_at	SETD5	0.47	4.19	1.84
1559161_at	1559161_at	0.47	4.17	1.83
228941_at	ALG10B	0.47	4.11	1.79
230183_at	EXT1	0.47	4.1	1.78
224843_at	SLAIN2	0.47	4.06	1.75
215198_s_at	CALD1	0.47	4.03	1.73
237333_at	RBBP4	0.47	4.01	1.72
238076_at	GATAD2B	0.47	4.01	1.72
234871_at	GPR98	0.47	3.99	1.71
228329_at	DAB1	0.47	3.96	1.69
229090_at	ZEB1-AS1	0.47	3.94	1.68
214098_at	KIAA1107	0.47	3.93	1.67
228742_at	228742_at	0.47	3.85	1.61
1554770_x_at	ZNF785	0.47	3.82	1.59
243739_at	243739_at	0.47	3.81	1.59
239184_at	239184_at	0.47	3.78	1.57
213213_at	DIDO1	0.47	3.77	1.56
213808_at	ADAM23	0.47	3.74	1.54
240652_at	240652_at	0.47	3.73	1.53
228720_at	SORCS2	0.47	3.69	1.51
233870_at	NAV1	0.47	3.66	1.49
240062_at	FAM3C	0.47	3.67	1.49
1560654_at	FLJ37201	0.47	3.65	1.48
226834_at	226834_at	0.47	3.61	1.45
235716_at	235716_at	0.47	3.6	1.45
234157_at	234157_at	0.47	3.59	1.44
235611_at	SREK1	0.47	3.54	1.41
215175_at	PCNX	0.47	3.54	1.4
219779_at	ZFHX4	0.47	3.54	1.4
207492_at	NGLY1	0.47	3.51	1.39
236428_at	236428_at	0.47	3.45	1.34
241262_at	241262_at	0.47	3.46	1.34
226444_at	226444_at	0.47	3.42	1.32
1552506_at	CRB2	0.48	4.66	2.14
1569069_s_at	TDRD3	0.48	4.62	2.12
222239_s_at	INTS6	0.48	4.61	2.12
216034_at	ZNF280A	0.48	4.57	2.09
222541_at	RSF1	0.48	4.57	2.09
227934_at	KPNA5	0.48	4.55	2.08
239411_at	239411_at	0.48	4.56	2.08
220549_at	220549_at	0.48	4.54	2.07
221965_at	MPHOSPH9	0.48	4.5	2.04
212997_s_at	TLK2	0.48	4.48	2.03
201825_s_at	SCCPDH	0.48	4.47	2.02
201313_at	ENO2	0.48	4.44	2.01
206404_at	FGF9	0.48	4.45	2.01
232094_at	KATNBL1	0.48	4.45	2.01
241911_at	CDKL3	0.48	4.45	2.01
1569312_at	1569312_at	0.48	4.43	2
1552789_at	SEC62	0.48	4.4	1.98
229464_at	MYEF2	0.48	4.4	1.98
230573_at	SGK2	0.48	4.4	1.98
210843_s_at	MFAP3L	0.48	4.35	1.94
243292_at	FAM132A	0.48	4.35	1.94
214060_at	214060_at	0.48	4.33	1.93
218422_s_at	RBM26	0.48	4.34	1.93
218945_at	METTL22	0.48	4.31	1.92
226908_at	LRIG3	0.48	4.31	1.92
228693_at	CCDC50	0.48	4.27	1.89
207169_x_at	207169_x_at	0.48	4.25	1.88
210729_at	NPY2R	0.48	4.24	1.88
227809_at	ZC3H6	0.48	4.23	1.87
238012_at	DPP7	0.48	4.23	1.87
226317_at	PPP4R2	0.48	4.22	1.86
227421_at	YBEY	0.48	4.18	1.84
212792_at	DPY19L1	0.48	4.17	1.83
223161_at	KIAA1147	0.48	4.15	1.82
243054_at	243054_at	0.48	4.16	1.82
223041_at	CD99L2	0.48	4.14	1.81
230245_s_at	LOC283663	0.48	4.15	1.81
232125_at	232125_at	0.48	4.15	1.81
237062_at	237062_at	0.48	4.08	1.77
235725_at	SMAD4	0.48	4.07	1.76
227285_at	C1orf51	0.48	4.06	1.75
226158_at	KLHL24	0.48	3.89	1.64
231978_at	TPCN2	0.48	3.86	1.62
225491_at	SLC1A2	0.48	3.84	1.61
235580_at	ZNF141	0.48	3.82	1.59
226210_s_at	MEG3	0.48	3.81	1.58
232216_at	YME1L1	0.48	3.78	1.57
1552323_s_at	FAM122C	0.48	3.76	1.55
207103_at	KCND2	0.48	3.74	1.54
209582_s_at	CD200	0.48	3.73	1.53
1559102_at	1559102_at	0.48	3.68	1.5
225633_at	DPY19L3	0.48	3.62	1.46
238956_at	EFNA2	0.48	3.54	1.4
227921_at	LOC100507312	0.48	3.46	1.35
202986_at	ARNT2	0.48	3.44	1.34
207234_at	RFX3	0.48	3.45	1.34
236961_at	236961_at	0.48	3.45	1.34
215433_at	DPY19L1	0.48	3.43	1.33
1553743_at	1553743_at	0.48	3.4	1.31
215281_x_at	POGZ	0.48	3.4	1.31
222313_at	222313_at	0.48	3.41	1.31
227533_at	227533_at	0.49	4.61	2.12
202089_s_at	SLC39A6	0.49	4.56	2.08
218370_s_at	S100PBP	0.49	4.54	2.07
225731_at	ANKRD50	0.49	4.55	2.07
236909_at	CCDC173	0.49	4.54	2.07
239339_at	239339_at	0.49	4.52	2.06
1556051_a_at	BICD1	0.49	4.52	2.05
219300_s_at	CNTNAP2	0.49	4.48	2.03
1557193_at	1557193_at	0.49	4.46	2.02
227154_at	IGSF21	0.49	4.46	2.02
230277_at	LOC100289187	0.49	4.46	2.02
238824_at	238824_at	0.49	4.43	1.99
232884_s_at	ZNF853	0.49	4.41	1.98
240224_at	240224_at	0.49	4.41	1.98
201295_s_at	WSB1	0.49	4.38	1.97
223095_at	MARVELD1	0.49	4.38	1.97
225230_at	DRAM2	0.49	4.36	1.95
226426_at	ADNP	0.49	4.33	1.93
211310_at	EZH1	0.49	4.32	1.92
227082_at	227082_at	0.49	4.32	1.92
233559_s_at	WDFY1	0.49	4.31	1.92
244049_at	244049_at	0.49	4.31	1.92
207219_at	ZFP69B	0.49	4.3	1.91
212554_at	CAP2	0.49	4.3	1.91
227630_at	PPP2R5E	0.49	4.3	1.91
1557283_a_at	ZNF519	0.49	4.28	1.9
217865_at	RNF130	0.49	4.28	1.9
225444_at	UBN2	0.49	4.28	1.9
241699_at	241699_at	0.49	4.28	1.9
1555842_at	CYTH2	0.49	4.26	1.89
205584_at	ALG13	0.49	4.27	1.89
232881_at	GNAS-AS1	0.49	4.26	1.89
225503_at	DHRSX	0.49	4.25	1.88
227031_at	SNX13	0.49	4.25	1.88
229793_at	ASAH2B	0.49	4.26	1.88
227837_at	227837_at	0.49	4.22	1.86
235309_at	RPS15A	0.49	4.22	1.86
1554182_at	1554182_at	0.49	4.14	1.81
204739_at	CENPC1	0.49	4.14	1.81
1559534_at	LOC100996419	0.49	4.11	1.79
229017_s_at	DSTYK	0.49	4.11	1.79
229722_at	LOC100270804	0.49	4.09	1.78
241376_at	241376_at	0.49	4.08	1.77
1564746_at	SLC9B2	0.49	4.03	1.73
205501_at	PDE10A	0.49	4.02	1.73
208089_s_at	TDRD3	0.49	4.03	1.73
230668_at	NKAIN4	0.49	4.01	1.72
230724_s_at	C11orf57	0.49	4.01	1.72
228218_at	LSAMP	0.49	3.97	1.7
241793_at	MSS51	0.49	3.98	1.7
1560834_a_at	RMST	0.49	3.96	1.69
223119_s_at	USP47	0.49	3.94	1.68
227525_at	GLCCI1	0.49	3.94	1.68
236780_at	236780_at	0.49	3.93	1.67
222595_s_at	DIDO1	0.49	3.91	1.66
223730_at	GPC6	0.49	3.88	1.64
238633_at	EPC1	0.49	3.82	1.59
225490_at	ARID2	0.49	3.79	1.58
48031_r_at	C5orf4	0.49	3.8	1.58
215412_x_at	215412_x_at	0.49	3.79	1.57
200923_at	LGALS3BP	0.49	3.74	1.54
244294_at	GTF2H5	0.49	3.73	1.54
226322_at	TMTC1	0.49	3.71	1.52
227866_at	227866_at	0.49	3.71	1.52
230072_at	TBC1D15	0.49	3.65	1.48
206706_at	NTF3	0.49	3.63	1.46
240908_at	240908_at	0.49	3.54	1.41
1569149_at	PDLIM7	0.49	3.51	1.39
233359_at	233359_at	0.49	3.47	1.36
1557889_at	1557889_at	0.49	3.45	1.34
1555363_s_at	LINC00663	0.49	3.44	1.33
1565436_s_at	MLL	0.49	3.44	1.33
213156_at	213156_at	0.49	3.4	1.31
222133_s_at	PHF20L1	0.49	3.41	1.31
207183_at	GPR19	0.5	4.51	2.05
213413_at	STON1	0.5	4.5	2.04
226150_at	PPAPDC1B	0.5	4.5	2.04
225074_at	RAB2B	0.5	4.49	2.03
228613_at	RAB11FIP3	0.5	4.49	2.03
244419_at	FRZB	0.5	4.48	2.03
1552879_a_at	ATOH7	0.5	4.47	2.02
217729_s_at	AES	0.5	4.45	2.01
242590_at	242590_at	0.5	4.46	2.01
237918_at	237918_at	0.5	4.43	2
235679_at	235679_at	0.5	4.42	1.99
208990_s_at	HNRNPH3	0.5	4.4	1.98
210540_s_at	B4GALT4	0.5	4.4	1.98
215232_at	ARHGAP44	0.5	4.4	1.98
228519_x_at	CIRBP	0.5	4.41	1.98
235681_at	235681_at	0.5	4.39	1.97
239165_at	239165_at	0.5	4.37	1.95
203912_s_at	DNASE1L1	0.5	4.34	1.94
204838_s_at	MLH3	0.5	4.35	1.94
207186_s_at	207186_s_at	0.5	4.34	1.94
222001_x_at	222001_x_at	0.5	4.35	1.94
230782_at	SORD	0.5	4.35	1.94
222931_s_at	THNSL1	0.5	4.33	1.93
213555_at	RWDD2A	0.5	4.3	1.91
232999_at	232999_at	0.5	4.29	1.91
206862_at	ZNF254	0.5	4.28	1.9
233515_at	233515_at	0.5	4.29	1.9
1554099_a_at	SPIN3	0.5	4.26	1.89
1569128_at	C3orf38	0.5	4.27	1.89
200986_at	SERPING1	0.5	4.27	1.89
230403_at	RFX3	0.5	4.27	1.89
201449_at	TIA1	0.5	4.25	1.88
202137_s_at	ZMYND11	0.5	4.25	1.88
222656_at	UBE2W	0.5	4.24	1.88
1558906_a_at	LOC100505783	0.5	4.24	1.87
203724_s_at	RUFY3	0.5	4.23	1.87
203846_at	TRIM32	0.5	4.2	1.85
229891_x_at	KIAA1704	0.5	4.2	1.85
239253_at	239253_at	0.5	4.21	1.85
48825_at	ING4	0.5	4.21	1.85
222772_at	MYEF2	0.5	4.19	1.84
225957_at	CREBRF	0.5	4.19	1.84
225193_at	KIAA1967	0.5	4.18	1.83
223642_at	ZIC2	0.5	4.16	1.82
218980_at	FHOD3	0.5	4.13	1.8
202088_at	SLC39A6	0.5	4.11	1.79
226250_at	226250_at	0.5	4.11	1.79
235074_at	SPRED1	0.5	4.05	1.75
230209_at	ZXDC	0.5	4.04	1.74
235890_at	TBL1XR1	0.5	4.04	1.74
239536_at	239536_at	0.5	4.02	1.72
1558692_at	C1orf85	0.5	3.99	1.71
204036_at	LPAR1	0.5	3.97	1.7
232796_at	232796_at	0.5	3.97	1.7
203384_s_at	GOLGA1	0.5	3.97	1.69
230687_at	SLC13A3	0.5	3.96	1.69
232051_at	CCDC102A	0.5	3.93	1.67
210006_at	ABHD14A	0.5	3.91	1.66
227751_at	PDCD5	0.5	3.9	1.65
1558154_at	1558154_at	0.5	3.89	1.64
232107_at	232107_at	0.5	3.89	1.64
236076_at	LOC257396	0.5	3.85	1.62
244319_at	244319_at	0.5	3.83	1.6
206696_at	GPR143	0.5	3.81	1.59
227870_at	IGDCC4	0.5	3.82	1.59
242807_at	FSD1L	0.5	3.82	1.59
242847_at	C11orf30	0.5	3.81	1.59
224823_at	MYLK	0.5	3.79	1.58
227512_at	MEX3A	0.5	3.78	1.57
239160_at	239160_at	0.5	3.78	1.57
215523_at	ZNF391	0.5	3.71	1.52
228358_at	SOX12	0.5	3.69	1.51
1553726_s_at	C6orf170	0.5	3.68	1.5
235782_at	235782_at	0.5	3.62	1.46
238492_at	238492_at	0.5	3.59	1.44
215786_at	215786_at	0.5	3.54	1.41
240579_at	NBAS	0.5	3.54	1.4
215386_at	215386_at	0.5	3.52	1.39
238852_at	PRRX1	0.5	3.5	1.38
235501_at	235501_at	0.5	3.45	1.34
236241_at	MED31	0.5	3.41	1.32
229540_at	RBPJ	0.5	3.39	1.3
205181_at	ZSCAN9	0.51	4.45	2.01
223581_at	ZNF577	0.51	4.41	1.98
231230_at	KCNK10	0.51	4.4	1.98
212677_s_at	CEP68	0.51	4.39	1.97
227728_at	PPM1A	0.51	4.39	1.97
237936_at	237936_at	0.51	4.39	1.97
205167_s_at	CDC25C	0.51	4.37	1.96
210871_x_at	SSX2IP	0.51	4.38	1.96
234192_s_at	GKAP1	0.51	4.37	1.96
206613_s_at	TAF1A	0.51	4.36	1.95
218819_at	INTS6	0.51	4.37	1.95
221428_s_at	TBL1XR1	0.51	4.36	1.95
209431_s_at	PATZ1	0.51	4.34	1.94
225396_at	RBBP4	0.51	4.34	1.94
228333_at	ZEB2	0.51	4.35	1.94
202274_at	ACTG2	0.51	4.34	1.93
1552347_at	CRYZL1	0.51	4.32	1.92
1556389_at	CNPY3	0.51	4.32	1.92
1557003_at	TTC23L	0.51	4.31	1.92
239644_at	239644_at	0.51	4.32	1.92
1556551_s_at	SLC39A6	0.51	4.3	1.91
218376_s_at	MICAL1	0.51	4.29	1.91
231090_s_at	ARID2	0.51	4.28	1.9
1557145_at	STK38	0.51	4.22	1.86
235826_at	235826_at	0.51	4.22	1.86
228545_at	ZNF148	0.51	4.21	1.85
238497_at	TMEM136	0.51	4.21	1.85
1554771_at	1554771_at	0.51	4.19	1.84
227428_at	GABPA	0.51	4.19	1.84
227585_at	ATAD1	0.51	4.17	1.83
242819_at	242819_at	0.51	4.17	1.83
206852_at	EPHA7	0.51	4.14	1.81
225856_at	CLOCK	0.51	4.1	1.78
1553227_s_at	BRWD1	0.51	4.09	1.77
202112_at	VWF	0.51	4.07	1.76
225956_at	CREBRF	0.51	4.07	1.76
227605_at	AIMP1	0.51	4.07	1.76
229078_s_at	KIAA1704	0.51	4.06	1.75
235082_at	PCNX	0.51	4.06	1.75
230815_at	LOC389765	0.51	4.04	1.74
238146_at	238146_at	0.51	4.04	1.74
1556033_at	1556033_at	0.51	4.03	1.73
237245_at	237245_at	0.51	4.03	1.73
1555882_at	SPIN3	0.51	4.01	1.72
219831_at	CDKL3	0.51	4	1.72
1557147_a_at	1557147_a_at	0.51	3.98	1.7
203409_at	DDB2	0.51	3.98	1.7
215491_at	MYCL1	0.51	3.98	1.7
220727_at	KCNK10	0.51	3.97	1.7
235240_at	ATXN3	0.51	3.96	1.69
204417_at	GALC	0.51	3.93	1.67
223930_at	223930_at	0.51	3.93	1.67
228046_at	ZNF827	0.51	3.93	1.67
207822_at	FGFR1	0.51	3.92	1.66
225921_at	NIN	0.51	3.92	1.66
235111_at	LSAMP	0.51	3.92	1.66
236337_at	SYCP2L	0.51	3.92	1.66
243189_at	NRF1	0.51	3.92	1.66
206695_x_at	ZNF43	0.51	3.89	1.64
239734_at	239734_at	0.51	3.89	1.64
225855_at	EPB41L5	0.51	3.83	1.6
232351_at	232351_at	0.51	3.83	1.6
235053_at	235053_at	0.51	3.82	1.59
1558143_a_at	BCL2L11	0.51	3.8	1.58
239504_at	239504_at	0.51	3.8	1.58
220497_at	ZNF214	0.51	3.77	1.56
226719_at	DERL2	0.51	3.78	1.56
235419_at	235419_at	0.51	3.76	1.55
203080_s_at	BAZ2B	0.51	3.74	1.54
1569681_at	1569681_at	0.51	3.73	1.53
221621_at	221621_at	0.51	3.71	1.52
221880_s_at	FAM174B	0.51	3.71	1.52
219233_s_at	GSDMB	0.51	3.66	1.49
214835_s_at	SUCLG2	0.51	3.63	1.47
221276_s_at	SYNC	0.51	3.6	1.44
1552518_s_at	MTBP	0.51	3.57	1.42
1552739_s_at	ST7L	0.51	3.55	1.41
244218_at	244218_at	0.51	3.52	1.39
212606_at	WDFY3	0.51	3.49	1.37
214239_x_at	214239_x_at	0.51	3.48	1.37
228342_s_at	ALPK3	0.51	3.47	1.36
226362_at	226362_at	0.51	3.46	1.35
1570143_at	1570143_at	0.51	3.45	1.34
210070_s_at	210070_s_at	0.51	3.44	1.34
208079_s_at	AURKA	0.52	4.32	1.93
228920_at	ZNF260	0.52	4.32	1.93
1557616_at	ZNF496	0.52	4.32	1.92
242834_at	242834_at	0.52	4.31	1.92
224939_at	NUFIP2	0.52	4.29	1.9
235063_at	C20orf196	0.52	4.29	1.9
201245_s_at	OTUB1	0.52	4.27	1.89
223013_at	TBL1XR1	0.52	4.27	1.89
213557_at	213557_at	0.52	4.25	1.88
222807_at	C11orf30	0.52	4.25	1.88
223854_at	223854_at	0.52	4.25	1.88
218824_at	PNMAL1	0.52	4.24	1.87
209583_s_at	CD200	0.52	4.22	1.86
219543_at	PBLD	0.52	4.23	1.86
221272_s_at	C1orf21	0.52	4.22	1.86
228980_at	228980_at	0.52	4.22	1.86
204862_s_at	NME3	0.52	4.21	1.85
207437_at	NOVA1	0.52	4.21	1.85
243618_s_at	ZNF827	0.52	4.21	1.85
228395_at	228395_at	0.52	4.19	1.84
206136_at	FZD5	0.52	4.17	1.83
228981_at	TMEM169	0.52	4.16	1.82
229903_x_at	RNPC3	0.52	4.16	1.82
232571_at	232571_at	0.52	4.16	1.82
236030_at	RCOR2	0.52	4.14	1.81
238768_at	C2orf68	0.52	4.13	1.81
226529_at	TMEM106B	0.52	4.13	1.8
231960_at	BRWD1	0.52	4.12	1.8
213852_at	213852_at	0.52	4.11	1.79
215505_s_at	STRN3	0.52	4.11	1.79
240184_at	SYNPR-AS1	0.52	4.12	1.79
229071_at	C17orf100	0.52	4.08	1.76
203019_x_at	SSX2IP	0.52	4.06	1.75
236340_at	236340_at	0.52	4.05	1.75
1556039_s_at	GPR173	0.52	4.04	1.74
229429_x_at	229429_x_at	0.52	4.04	1.74
204672_s_at	ANKRD6	0.52	4.03	1.73
215228_at	NHLH2	0.52	4.02	1.73
235345_at	RUFY2	0.52	4.02	1.73
203651_at	ZFYVE16	0.52	4.01	1.72
226457_at	226457_at	0.52	4	1.71
243350_at	243350_at	0.52	3.96	1.69
219400_at	CNTNAP1	0.52	3.94	1.68
230871_at	DHX30	0.52	3.95	1.68
205698_s_at	MAP2K6	0.52	3.93	1.67
243502_at	GJC1	0.52	3.9	1.65
229411_at	PNCK	0.52	3.88	1.63
214192_at	NUP88	0.52	3.86	1.62
218879_s_at	MTHFSD	0.52	3.86	1.62
1559544_s_at	LINC00441	0.52	3.84	1.61
222667_s_at	ASH1L	0.52	3.81	1.59
225477_s_at	NR2C2	0.52	3.81	1.59
226764_at	ZNF827	0.52	3.82	1.59
231789_at	PCDHB15	0.52	3.8	1.58
228211_at	ERCC6L2	0.52	3.79	1.57
216836_s_at	ERBB2	0.52	3.76	1.55
1556322_a_at	1556322_a_at	0.52	3.74	1.54
1557167_at	HCG11	0.52	3.74	1.54
208779_x_at	208779_x_at	0.52	3.75	1.54
230831_at	FRMD5	0.52	3.73	1.54
236315_at	236315_at	0.52	3.74	1.54
215246_at	LARP7	0.52	3.71	1.52
219353_at	NHLRC2	0.52	3.72	1.52
231261_at	CATSPERG	0.52	3.7	1.51
220818_s_at	TRPC4	0.52	3.66	1.49
209815_at	PTCH1	0.52	3.6	1.45
244327_at	244327_at	0.52	3.61	1.45
244682_at	CAMSAP1	0.52	3.6	1.45
237332_at	237332_at	0.52	3.59	1.44
240588_at	240588_at	0.52	3.57	1.43
243655_x_at	243655_x_at	0.52	3.57	1.43
215145_s_at	CNTNAP2	0.52	3.53	1.4
1557300_s_at	1557300_s_at	0.52	3.52	1.39
212542_s_at	PHIP	0.52	3.5	1.38
244547_at	SGK494	0.52	3.49	1.37
226842_at	FBXL20	0.52	3.48	1.36
232647_at	PROCA1	0.52	3.47	1.36
214121_x_at	PDLIM7	0.52	3.45	1.34
219726_at	NLGN3	0.52	3.43	1.33
206003_at	CEP135	0.52	3.41	1.32
232319_at	232319_at	0.52	3.42	1.32
216908_x_at	RRN3P1	0.52	3.4	1.31
1560346_at	1560346_at	0.53	4.24	1.88
242607_at	242607_at	0.53	4.25	1.88
217216_x_at	MLH3	0.53	4.24	1.87
229312_s_at	GKAP1	0.53	4.23	1.87
230715_at	ZNF518B	0.53	4.24	1.87
1558369_at	MPHOSPH9	0.53	4.21	1.85
203249_at	EZH1	0.53	4.2	1.85
205510_s_at	FLJ10038	0.53	4.2	1.85
226408_at	TEAD2	0.53	4.21	1.85
237161_at	LOC100506059	0.53	4.18	1.84
210892_s_at	GTF2I	0.53	4.18	1.83
215258_at	CADM4	0.53	4.18	1.83
226254_s_at	KIAA1430	0.53	4.18	1.83
230789_at	ZNF280B	0.53	4.17	1.83
230865_at	LIX1	0.53	4.17	1.83
1555460_a_at	SLC39A6	0.53	4.13	1.8
226399_at	DNAJB14	0.53	4.11	1.79
229572_at	ATP6V0A2	0.53	4.11	1.79
236194_at	236194_at	0.53	4.12	1.79
243439_at	ZNF418	0.53	4.11	1.79
212726_at	PHF2	0.53	4.08	1.77
226134_s_at	226134_s_at	0.53	4.08	1.76
1564190_x_at	ZNF519	0.53	4.06	1.75
223824_at	RNLS	0.53	4.06	1.75
218179_s_at	TRAPPC11	0.53	4.05	1.74
227434_at	WBSCR17	0.53	4.04	1.74
201826_s_at	SCCPDH	0.53	4.02	1.73
209589_s_at	EPHB2	0.53	4.02	1.73
227754_at	227754_at	0.53	4.02	1.73
228275_at	LOC100505687	0.53	4.02	1.73
235980_at	PIK3CA	0.53	4.02	1.73
241417_at	241417_at	0.53	4.03	1.73
242919_at	ZNF253	0.53	4.03	1.73
222008_at	COL9A1	0.53	4.01	1.72
223190_s_at	MLL5	0.53	4	1.72
232533_at	METTL8	0.53	4	1.72
205408_at	MLLT10	0.53	4	1.71
226644_at	MIB2	0.53	3.98	1.7
222626_at	RBM26	0.53	3.96	1.69
241372_at	ZC3H6	0.53	3.95	1.68
229211_at	DUSP28	0.53	3.93	1.67
226528_at	MTX3	0.53	3.92	1.66
227578_at	TMPO-AS1	0.53	3.89	1.64
212321_at	SGPL1	0.53	3.87	1.63
202180_s_at	MVP	0.53	3.86	1.62
1555520_at	PTCH1	0.53	3.84	1.61
1568868_at	CYP27C1	0.53	3.83	1.6
226884_at	LRRN1	0.53	3.83	1.6
239872_at	239872_at	0.53	3.83	1.6
243829_at	BRAF	0.53	3.83	1.6
213469_at	PGAP1	0.53	3.82	1.59
221261_x_at	221261_x_at	0.53	3.81	1.59
227332_at	PXN-AS1	0.53	3.81	1.59
235612_at	235612_at	0.53	3.82	1.59
239752_at	239752_at	0.53	3.78	1.57
1557117_at	INTS6-AS1	0.53	3.78	1.56
203882_at	IRF9	0.53	3.78	1.56
234990_at	CBX5	0.53	3.77	1.56
229468_at	229468_at	0.53	3.75	1.54
235142_at	ZBTB8A	0.53	3.75	1.54
243553_x_at	TRAF3IP2-AS1	0.53	3.74	1.54
239955_at	239955_at	0.53	3.69	1.5
214177_s_at	PBXIP1	0.53	3.67	1.49
235719_at	CYP4V2	0.53	3.67	1.49
215297_at	LOC441204	0.53	3.64	1.48
208719_s_at	DDX17	0.53	3.64	1.47
222916_s_at	HDLBP	0.53	3.63	1.47
223818_s_at	RSF1	0.53	3.62	1.46
225048_at	PHF10	0.53	3.61	1.45
1555860_x_at	SETD5-AS1	0.53	3.59	1.44
223313_s_at	223313_s_at	0.53	3.58	1.44
230988_at	ADD2	0.53	3.59	1.44
228448_at	MAP6	0.53	3.58	1.43
212000_at	SUGP2	0.53	3.56	1.42
219301_s_at	CNTNAP2	0.53	3.52	1.4
208536_s_at	BCL2L11	0.53	3.5	1.38
226846_at	PHYHD1	0.53	3.48	1.37
228905_at	PCM1	0.53	3.45	1.34
209588_at	EPHB2	0.53	3.44	1.33
225238_at	MSI2	0.53	3.44	1.33
240172_at	ERGIC2	0.53	3.42	1.32
214894_x_at	MACF1	0.53	3.41	1.31
1555448_at	AP5M1	0.53	3.39	1.3
212566_at	MAP4	0.53	3.38	1.3
220254_at	LRP12	0.54	4.18	1.84
212675_s_at	CEP68	0.54	4.17	1.83
222540_s_at	RSF1	0.54	4.18	1.83
228968_at	ZNF449	0.54	4.17	1.83
230235_at	MCTS1	0.54	4.17	1.83
237040_at	CWF19L2	0.54	4.17	1.83
226155_at	FAM160B1	0.54	4.16	1.82
205830_at	CLGN	0.54	4.14	1.81
213803_at	213803_at	0.54	4.15	1.81
231921_at	DCAF17	0.54	4.15	1.81
235533_at	COX19	0.54	4.14	1.81
235596_at	235596_at	0.54	4.14	1.81
235830_at	235830_at	0.54	4.14	1.81
218570_at	218570_at	0.54	4.12	1.8
219817_at	MAPKAPK5-AS1	0.54	4.12	1.8
225677_at	BCAP29	0.54	4.12	1.8
225458_at	PP7080	0.54	4.12	1.79
239265_at	SLC35G1	0.54	4.09	1.78
205340_at	ZBTB24	0.54	4.08	1.77
224784_at	MLLT6	0.54	4.07	1.76
1554206_at	TMLHE	0.54	4.06	1.75
1559528_at	LOC100129917	0.54	4.06	1.75
215057_at	LOC100272228	0.54	4.06	1.75
223849_s_at	MOV10	0.54	4.06	1.75
225845_at	ZBTB44	0.54	4.06	1.75
235051_at	CCDC50	0.54	4.04	1.74
243055_at	243055_at	0.54	4.05	1.74
1554614_a_at	PTBP2	0.54	4.03	1.73
205372_at	PLAG1	0.54	4.03	1.73
211596_s_at	LRIG1	0.54	4.03	1.73
238787_at	DENND1B	0.54	4.01	1.72
212651_at	RHOBTB1	0.54	3.99	1.71
226820_at	ZNF362	0.54	4	1.71
236146_at	SYNCRIP	0.54	3.99	1.71
241384_x_at	GK5	0.54	3.98	1.71
40446_at	PHF1	0.54	4	1.71
229408_at	HDAC5	0.54	3.97	1.7
227947_at	PHACTR2	0.54	3.97	1.69
220977_x_at	EPB41L5	0.54	3.94	1.68
222293_at	CADM4	0.54	3.94	1.68
229695_at	229695_at	0.54	3.95	1.68
232323_s_at	TTC17	0.54	3.95	1.68
227531_at	CLOCK	0.54	3.93	1.67
1554424_at	FIP1L1	0.54	3.9	1.65
206580_s_at	EFEMP2	0.54	3.9	1.65
208914_at	GGA2	0.54	3.9	1.65
235045_at	RBM7	0.54	3.91	1.65
222610_s_at	S100PBP	0.54	3.88	1.63
218515_at	PAXBP1	0.54	3.87	1.62
240419_at	SLC6A15	0.54	3.84	1.61
1569527_at	1569527_at	0.54	3.8	1.58
227593_at	FLJ37453	0.54	3.8	1.58
235308_at	ZBTB20	0.54	3.79	1.57
226838_at	TTC32	0.54	3.77	1.56
240547_at	240547_at	0.54	3.77	1.56
218125_s_at	CCDC25	0.54	3.74	1.54
229544_at	229544_at	0.54	3.75	1.54
213074_at	PHIP	0.54	3.72	1.53
210563_x_at	CFLAR	0.54	3.69	1.5
229433_at	RBM26	0.54	3.67	1.49
244424_at	LOC439938	0.54	3.67	1.49
232256_s_at	LOC401321	0.54	3.65	1.48
202250_s_at	DCAF8	0.54	3.59	1.44
221988_at	SMIM7	0.54	3.58	1.44
229244_at	LSAMP	0.54	3.58	1.44
213218_at	ZSCAN26	0.54	3.57	1.43
218683_at	PTBP2	0.54	3.58	1.43
231878_at	PAGR1	0.54	3.58	1.43
236229_at	236229_at	0.54	3.58	1.43
241434_at	241434_at	0.54	3.57	1.43
241991_at	241991_at	0.54	3.58	1.43
220716_at	GNL3LP1	0.54	3.52	1.4
233685_at	233685_at	0.54	3.53	1.4
238229_at	TMEM67	0.54	3.49	1.37
229009_at	SIX5	0.54	3.43	1.33
223997_at	FNIP1	0.54	3.42	1.32
225745_at	LRP6	0.54	3.42	1.32
226346_at	MEX3A	0.54	3.42	1.32
238323_at	TEAD2	0.54	3.41	1.32
201506_at	TGFBI	0.54	3.4	1.31
224849_at	TTC17	0.55	4.12	1.79
228225_at	PEX2	0.55	4.11	1.79
1558700_s_at	ZNF260	0.55	4.09	1.77
211954_s_at	IPO5	0.55	4.07	1.76
1556021_at	GPR180	0.55	4.06	1.75
204639_at	ADA	0.55	4.03	1.74
239158_at	239158_at	0.55	4.04	1.74
209911_x_at	HIST1H2BD	0.55	4.03	1.73
214116_at	BTD	0.55	4.02	1.73
228560_at	228560_at	0.55	4.03	1.73
228778_at	MCPH1	0.55	4.03	1.73
231101_at	231101_at	0.55	4.03	1.73
231975_s_at	MIER3	0.55	4.03	1.73
202979_s_at	CREBZF	0.55	4.02	1.72
212194_s_at	TM9SF4	0.55	4.01	1.72
228234_at	228234_at	0.55	4.01	1.72
228961_at	MIER3	0.55	4.02	1.72
229549_at	CALU	0.55	3.99	1.71
229153_at	SLC7A6OS	0.55	3.98	1.7
1558097_at	1558097_at	0.55	3.96	1.69
204092_s_at	AURKA	0.55	3.96	1.69
229346_at	NES	0.55	3.96	1.69
227276_at	PLXDC2	0.55	3.93	1.67
212498_at	MARCH6	0.55	3.92	1.66
220997_s_at	DIAPH3	0.55	3.91	1.65
230979_at	230979_at	0.55	3.91	1.65
210475_at	POU3F1	0.55	3.87	1.63
1557137_at	TMEM17	0.55	3.86	1.62
218421_at	CERK	0.55	3.85	1.62
226148_at	ZBTB44	0.55	3.86	1.62
238509_at	CUL1	0.55	3.86	1.62
227468_at	CPT1C	0.55	3.83	1.6
201448_at	TIA1	0.55	3.82	1.59
212138_at	PDS5A	0.55	3.81	1.59
51228_at	RBM12B	0.55	3.78	1.57
202876_s_at	PBX2	0.55	3.77	1.56
203264_s_at	ARHGEF9	0.55	3.77	1.56
212190_at	SERPINE2	0.55	3.77	1.56
1556042_s_at	LOC338799	0.55	3.76	1.55
1560853_x_at	ZNF826P	0.55	3.76	1.55
204743_at	TAGLN3	0.55	3.74	1.54
219689_at	SEMA3G	0.55	3.75	1.54
231725_at	PCDHB2	0.55	3.75	1.54
219171_s_at	ZNF236	0.55	3.71	1.52
236517_at	MEGF10	0.55	3.7	1.52
227509_x_at	227509_x_at	0.55	3.69	1.51
220450_at	220450_at	0.55	3.68	1.5
235443_at	LOC100131067	0.55	3.68	1.5
222633_at	TBL1XR1	0.55	3.67	1.49
228328_at	KLHL28	0.55	3.66	1.49
1553957_at	ZNF564	0.55	3.65	1.48
212036_s_at	PNN	0.55	3.65	1.48
219843_at	IPP	0.55	3.65	1.48
229645_at	FAM69C	0.55	3.65	1.48
230896_at	BEND4	0.55	3.64	1.48
243112_at	LOC100996424	0.55	3.65	1.48
202920_at	ANK2	0.55	3.64	1.47
209525_at	HDGFRP3	0.55	3.64	1.47
231251_at	WIPF2	0.55	3.63	1.47
236619_at	236619_at	0.55	3.63	1.47
1557325_at	1557325_at	0.55	3.61	1.46
220667_at	USP49	0.55	3.6	1.45
206343_s_at	NRG1	0.55	3.59	1.44
230738_at	230738_at	0.55	3.59	1.44
1558310_s_at	LOC100132356	0.55	3.57	1.43
214746_s_at	ZNF467	0.55	3.58	1.43
230482_at	ST6GALNAC5	0.55	3.58	1.43
1568603_at	CADPS	0.55	3.56	1.42
241754_at	SCAI	0.55	3.56	1.42
226310_at	RICTOR	0.55	3.55	1.41
228880_at	NAT8L	0.55	3.54	1.41
201010_s_at	TXNIP	0.55	3.53	1.4
235913_at	ZNF880	0.55	3.52	1.39
1557797_a_at	1557797_a_at	0.55	3.51	1.38
217805_at	ILF3	0.55	3.47	1.36
242812_at	HCG18	0.55	3.48	1.36
226429_at	KIAA1704	0.55	3.46	1.34
210056_at	RND1	0.55	3.43	1.33
241337_at	241337_at	0.55	3.41	1.32
243976_at	243976_at	0.55	3.42	1.32
208579_x_at	208579_x_at	0.55	3.4	1.31
208859_s_at	ATRX	0.55	3.4	1.31
217100_s_at	UBXN7	0.56	4.02	1.73
239637_at	RAB18	0.56	4.02	1.73
216885_s_at	DCAF8	0.56	4.01	1.72
231012_at	SLC35G1	0.56	4.02	1.72
216705_s_at	ADA	0.56	3.99	1.71
236197_at	236197_at	0.56	3.99	1.71
219635_at	ZNF606	0.56	3.98	1.7
225903_at	PIGU	0.56	3.98	1.7
215947_s_at	215947_s_at	0.56	3.96	1.69
223652_at	AS3MT	0.56	3.96	1.69
224521_s_at	CCDC77	0.56	3.97	1.69
234676_s_at	N6AMT1	0.56	3.96	1.69
204706_at	INPP5E	0.56	3.94	1.68
211998_at	211998_at	0.56	3.95	1.68
212170_at	RBM12	0.56	3.95	1.68
226798_at	BCL2L13	0.56	3.95	1.68
224220_x_at	TRPC4	0.56	3.93	1.67
235532_at	235532_at	0.56	3.93	1.67
217765_at	NRBP1	0.56	3.92	1.66
225237_s_at	MSI2	0.56	3.91	1.66
203319_s_at	ZNF148	0.56	3.9	1.65
225240_s_at	MSI2	0.56	3.91	1.65
220987_s_at	220987_s_at	0.56	3.89	1.64
1561829_at	1561829_at	0.56	3.88	1.63
212534_at	ZNF24	0.56	3.87	1.63
213698_at	213698_at	0.56	3.88	1.63
213743_at	CCNT2	0.56	3.87	1.63
213916_at	213916_at	0.56	3.87	1.63
217519_at	217519_at	0.56	3.87	1.63
224766_at	224766_at	0.56	3.88	1.63
239207_at	KDM5C	0.56	3.88	1.63
239295_at	SRSF12	0.56	3.88	1.63
224852_at	TTC17	0.56	3.86	1.62
227407_at	TAPT1	0.56	3.86	1.62
231022_at	OCLN	0.56	3.86	1.62
64432_at	MAPKAPK5-AS1	0.56	3.85	1.62
1557196_a_at	1557196_a_at	0.56	3.85	1.61
219094_at	ARMC8	0.56	3.82	1.6
228702_at	FLJ43663	0.56	3.82	1.6
218877_s_at	TRMT11	0.56	3.81	1.59
220326_s_at	ARHGEF40	0.56	3.8	1.58
1553247_a_at	ZNF709	0.56	3.78	1.57
217554_at	217554_at	0.56	3.79	1.57
224897_at	WDR26	0.56	3.79	1.57
229787_s_at	229787_s_at	0.56	3.79	1.57
201707_at	PEX19	0.56	3.76	1.55
1553407_at	MACF1	0.56	3.74	1.54
243671_at	243671_at	0.56	3.73	1.54
238989_at	C1GALT1C1	0.56	3.72	1.53
235845_at	SP5	0.56	3.72	1.52
205583_s_at	ALG13	0.56	3.7	1.51
238659_at	KIAA0141	0.56	3.69	1.51
1557169_x_at	HCG11	0.56	3.68	1.5
239128_at	TMEM221	0.56	3.68	1.5
221569_at	AHI1	0.56	3.67	1.49
206959_s_at	UPF3A	0.56	3.65	1.48
209023_s_at	STAG2	0.56	3.64	1.48
224719_s_at	C12orf57	0.56	3.65	1.48
234073_at	SDK2	0.56	3.65	1.48
235603_at	HNRNPU	0.56	3.65	1.48
218569_s_at	KBTBD4	0.56	3.61	1.45
223169_s_at	RHOU	0.56	3.61	1.45
215766_at	GSTA1	0.56	3.6	1.44
32259_at	EZH1	0.56	3.58	1.43
215772_x_at	SUCLG2	0.56	3.55	1.42
238631_at	238631_at	0.56	3.56	1.42
1556117_at	LOC79015	0.56	3.55	1.41
240355_at	240355_at	0.56	3.54	1.41
1569713_at	SEC24B-AS1	0.56	3.53	1.4
212899_at	CDK19	0.56	3.52	1.4
220321_s_at	CCDC121	0.56	3.54	1.4
226119_at	PCMTD1	0.56	3.53	1.4
226252_at	226252_at	0.56	3.53	1.4
236327_at	236327_at	0.56	3.53	1.4
1561597_x_at	1561597_x_at	0.56	3.47	1.35
202241_at	TRIB1	0.56	3.45	1.34
219910_at	FICD	0.56	3.44	1.34
225954_s_at	MIDN	0.56	3.43	1.33
1558116_x_at	RECK	0.56	3.42	1.32
237663_at	237663_at	0.56	3.42	1.32
228655_at	228655_at	0.56	3.41	1.31
239151_at	LOC399753	0.56	3.4	1.31
226455_at	CREB3L4	0.57	3.93	1.67
238681_at	GDPD1	0.57	3.94	1.67
232048_at	FAM76B	0.57	3.92	1.66
232679_at	232679_at	0.57	3.91	1.66
223318_s_at	ALKBH7	0.57	3.9	1.65
238468_at	TNRC6B	0.57	3.9	1.65
1554037_a_at	ZBTB24	0.57	3.89	1.64
203318_s_at	ZNF148	0.57	3.89	1.64
219800_s_at	THNSL1	0.57	3.89	1.64
223155_at	HDHD2	0.57	3.87	1.63
228248_at	RICTOR	0.57	3.88	1.63
207550_at	MPL	0.57	3.86	1.62
224691_at	UHMK1	0.57	3.84	1.61
228345_at	CHIC1	0.57	3.84	1.61
208119_s_at	ZNF93	0.57	3.81	1.59
213574_s_at	213574_s_at	0.57	3.81	1.59
217833_at	SYNCRIP	0.57	3.82	1.59
225228_at	DRAM2	0.57	3.81	1.59
227288_at	SREK1IP1	0.57	3.82	1.59
236798_at	LOC100505687	0.57	3.82	1.59
226483_at	TMEM68	0.57	3.8	1.58
1557260_a_at	ZNF382	0.57	3.78	1.57
209005_at	FBXL5	0.57	3.79	1.57
202778_s_at	ZMYM2	0.57	3.77	1.56
215667_x_at	215667_x_at	0.57	3.78	1.56
211987_at	TOP2B	0.57	3.76	1.55
228603_at	ACTR3	0.57	3.76	1.55
235727_at	KLHL28	0.57	3.76	1.55
240076_at	240076_at	0.57	3.76	1.55
215627_at	215627_at	0.57	3.74	1.54
235105_at	235105_at	0.57	3.74	1.54
202982_s_at	202982_s_at	0.57	3.73	1.53
206958_s_at	UPF3A	0.57	3.73	1.53
212551_at	CAP2	0.57	3.72	1.53
226102_at	226102_at	0.57	3.73	1.53
238917_s_at	DENND5B	0.57	3.73	1.53
201447_at	TIA1	0.57	3.71	1.52
212459_x_at	SUCLG2	0.57	3.71	1.52
230166_at	KIAA1958	0.57	3.71	1.52
240309_at	240309_at	0.57	3.7	1.52
206846_s_at	HDAC6	0.57	3.69	1.51
228070_at	PPP2R5E	0.57	3.7	1.51
228398_at	SENP8	0.57	3.69	1.51
235189_at	NARG2	0.57	3.69	1.51
237247_at	USP51	0.57	3.69	1.51
207264_at	KDELR3	0.57	3.69	1.5
223610_at	SEMA5B	0.57	3.68	1.5
227745_at	LOC100507018	0.57	3.68	1.5
240357_at	240357_at	0.57	3.68	1.5
31799_at	31799_at	0.57	3.69	1.5
204950_at	CARD8	0.57	3.66	1.49
213551_x_at	213551_x_at	0.57	3.67	1.49
219012_s_at	C11orf30	0.57	3.67	1.49
235721_at	DTX3	0.57	3.66	1.49
240117_at	FBN3	0.57	3.66	1.49
243526_at	WDR86	0.57	3.66	1.49
229360_at	ZNF280B	0.57	3.65	1.48
232909_s_at	232909_s_at	0.57	3.65	1.48
234985_at	LDLRAD3	0.57	3.65	1.48
235684_s_at	SESN3	0.57	3.66	1.48
217615_at	217615_at	0.57	3.64	1.47
218453_s_at	TMEM242	0.57	3.62	1.46
219685_at	TMEM35	0.57	3.62	1.46
205447_s_at	MAP3K12	0.57	3.61	1.45
213893_x_at	213893_x_at	0.57	3.61	1.45
226821_at	226821_at	0.57	3.6	1.45
227638_at	EPG5	0.57	3.6	1.45
243259_at	ATXN7	0.57	3.6	1.45
204291_at	ZNF518A	0.57	3.6	1.44
233667_at	233667_at	0.57	3.58	1.44
1553167_a_at	SEPSECS	0.57	3.57	1.43
208677_s_at	BSG	0.57	3.58	1.43
226927_at	C12orf73	0.57	3.58	1.43
238444_at	ZNF618	0.57	3.56	1.42
214323_s_at	UPF3A	0.57	3.54	1.41
217122_s_at	217122_s_at	0.57	3.54	1.41
224990_at	SMIM14	0.57	3.55	1.41
205682_x_at	APOM	0.57	3.53	1.4
225834_at	225834_at	0.57	3.51	1.39
230786_at	ZCCHC8	0.57	3.52	1.39
1562953_s_at	WDFY3-AS2	0.57	3.5	1.38
201709_s_at	NIPSNAP1	0.57	3.51	1.38
236609_at	PMS1	0.57	3.5	1.38
225445_at	UBN2	0.57	3.48	1.36
235484_at	PTAR1	0.57	3.47	1.36
242647_at	USP34	0.57	3.47	1.36
1007_s_at	1007_s_at	0.57	3.46	1.35
211444_at	211444_at	0.57	3.45	1.34
208633_s_at	MACF1	0.57	3.44	1.33
217596_at	UPF3A	0.57	3.44	1.33
243790_at	ZNF585A	0.57	3.44	1.33
212232_at	FNBP4	0.57	3.41	1.32
215128_at	215128_at	0.57	3.42	1.32
229609_at	LOC728190	0.57	3.41	1.32
1569022_a_at	PIK3C2A	0.57	3.41	1.31
228816_at	228816_at	0.57	3.4	1.31
229066_at	229066_at	0.57	3.41	1.31
235893_at	235893_at	0.57	3.4	1.31
239754_at	239754_at	0.57	3.39	1.3
206445_s_at	PRMT1	0.58	3.84	1.61
206237_s_at	NRG1	0.58	3.81	1.59
210304_at	PDE6B	0.58	3.81	1.59
217976_s_at	DYNC1LI1	0.58	3.82	1.59
230069_at	SFXN1	0.58	3.82	1.59
203654_s_at	COIL	0.58	3.8	1.58
225352_at	SEC62	0.58	3.8	1.58
227496_at	227496_at	0.58	3.8	1.58
228029_at	228029_at	0.58	3.8	1.58
218166_s_at	RSF1	0.58	3.79	1.57
239133_at	CTDSPL2	0.58	3.78	1.57
209750_at	NR1D2	0.58	3.77	1.56
211375_s_at	ILF3	0.58	3.77	1.56
214757_at	PMS2L2	0.58	3.76	1.55
1557104_at	ZSCAN30	0.58	3.75	1.54
212078_s_at	MLL	0.58	3.74	1.54
213161_at	213161_at	0.58	3.74	1.54
221519_at	FBXW4	0.58	3.73	1.54
227713_at	KATNAL1	0.58	3.74	1.54
235015_at	ZDHHC9	0.58	3.74	1.54
222806_s_at	C11orf30	0.58	3.73	1.53
213301_x_at	TRIM24	0.58	3.71	1.52
220609_at	LOC202181	0.58	3.72	1.52
228670_at	TEP1	0.58	3.71	1.52
1554472_a_at	PHF20L1	0.58	3.7	1.51
207839_s_at	TMEM8B	0.58	3.7	1.51
213920_at	CUX2	0.58	3.68	1.5
236126_at	ACVR2B	0.58	3.68	1.5
241746_at	CUL7	0.58	3.68	1.5
1557046_x_at	LINC00665	0.58	3.66	1.49
213889_at	PIGL	0.58	3.66	1.49
219794_at	VPS53	0.58	3.67	1.49
238437_at	ZNF805	0.58	3.67	1.49
238781_at	SREK1	0.58	3.67	1.49
242750_at	MMAA	0.58	3.66	1.49
213693_s_at	MUC1	0.58	3.65	1.48
232102_at	METTL6	0.58	3.65	1.48
205178_s_at	RBBP6	0.58	3.63	1.47
207983_s_at	STAG2	0.58	3.63	1.47
236680_at	236680_at	0.58	3.64	1.47
203271_s_at	UNC119	0.58	3.61	1.45
226814_at	ADAMTS9	0.58	3.6	1.45
244786_at	SNHG10	0.58	3.61	1.45
205497_at	ZNF175	0.58	3.6	1.44
221595_at	RBM48	0.58	3.59	1.44
231112_at	SNRPE	0.58	3.59	1.44
241994_at	XDH	0.58	3.58	1.43
223596_at	SLC12A6	0.58	3.55	1.42
227940_at	LOC339803	0.58	3.56	1.42
238191_at	238191_at	0.58	3.56	1.42
214670_at	ZKSCAN1	0.58	3.55	1.41
222106_at	PRND	0.58	3.54	1.41
235344_at	PPM1A	0.58	3.55	1.41
1560509_at	1560509_at	0.58	3.53	1.4
223815_at	CEP95	0.58	3.54	1.4
209430_at	BTAF1	0.58	3.51	1.39
212001_at	SUGP2	0.58	3.51	1.39
218127_at	NFYB	0.58	3.51	1.39
230355_at	SEPT7P2	0.58	3.52	1.39
1555630_a_at	1555630_a_at	0.58	3.51	1.38
1559467_at	1559467_at	0.58	3.5	1.38
228482_at	228482_at	0.58	3.5	1.38
235672_at	MAP6	0.58	3.5	1.38
1552790_a_at	SEC62	0.58	3.48	1.37
225123_at	SESN3	0.58	3.49	1.37
228131_at	ERCC1	0.58	3.49	1.37
229630_s_at	WTAP	0.58	3.49	1.37
237369_at	237369_at	0.58	3.5	1.37
1558600_a_at	1558600_a_at	0.58	3.45	1.34
210714_at	R3HDM1	0.58	3.44	1.34
214996_at	214996_at	0.58	3.44	1.33
225742_at	MDM4	0.58	3.44	1.33
218066_at	SLC12A7	0.58	3.42	1.32
225668_at	FAM173B	0.58	3.42	1.32
230752_at	230752_at	0.58	3.42	1.32
244362_at	244362_at	0.58	3.42	1.32
212167_s_at	SMARCB1	0.58	3.4	1.31
233182_x_at	ATXN3	0.58	3.4	1.31
219798_s_at	MEPCE	0.59	3.79	1.57
219237_s_at	DNAJB14	0.59	3.77	1.56
[truncated: 3,134 more rows]
